# Supplementary material
Source: PubMed Central journal article supplement (PMC6644556)
Supplement: ao8b02155_si_001.pdf [file ao8b02155_si_001.pdf]

*Supporting Information*

*for*

**Nickel-Catalyzed Decarbonylative Alkylation of Aroyl Fluorides Assisted by  
Lewis-Acidic Organoboranes**

Yasuhiro Okuda,<sup>†</sup> Jie Xu, Takumi Ishida, Chen-an Wang, and Yasushi Nishihara\*

*Research Institute for Interdisciplinary Science, Okayama University, 3-1-1  
Tsushima-cho, Okayama 700-8530, Japan*

*<sup>†</sup> Present address: Department of Applied Chemistry and Biotechnology, Okayama University of  
Science, 1-1 Ridai-cho, Kita-ku, Okayama 700-0005, Japan*

Phone: +81-86-251-7855

Fax: +81-86-251-7855

E-mail: ynishiha@okayama-u.ac.jp

|                                                                                                      |                |
|------------------------------------------------------------------------------------------------------|----------------|
| 1. <i>General</i>                                                                                    | <i>S2-S7</i>   |
| 2. <i>Optimization of the Reaction Conditions</i>                                                    | <i>S8-S12</i>  |
| 3. <i>Copies of <sup>1</sup>H and <sup>13</sup>C{<sup>1</sup>H} NMR Charts for the New Compounds</i> | <i>S13-S58</i> |
| 4. <i>Copies of <sup>1</sup>H NMR Charts for the Known Compounds</i>                                 | <i>S59-S73</i> |
| 5. <i>References</i>                                                                                 | <i>S74</i>     |

## 1. General

High resolution mass spectra (HRMS) were obtained by fast atom bombardment (FAB) using a double focusing magnetic sector mass spectrometer.

**Representative Procedure for Decarbonylative Ethylation of 1a. Synthesis of 4-ethylbiphenyl (4aa).**<sup>1</sup> To a 20 mL Schlenk tube, were added Ni(cod)<sub>2</sub> (10 mol %, 3.4 mg, 0.0125 mmol), DPPE (10 mol %, 5.0 mg, 0.0125 mmol), and toluene (500  $\mu$ L) were added. After short minutes stirring, BEt<sub>3</sub> (2a) (1.0 M hexane solution, 125  $\mu$ L, 0.125 mmol) and biphenyl-4-carbonyl fluoride (1a) (25.0 mg, 0.125 mmol) were added, and resulting mixture was heated at 130 °C. After 24 h, the reaction was quenched with 1 M HCl solution, extracted with EtOAc, washed by brine, and dried over MgSO<sub>4</sub>. After the volatiles were removed under vacuum, the crude product was purified by column chromatography (hexane:Et<sub>2</sub>O = 10:1) to afford 4aa (17.7 mg, 0.0971 mmol) in 78% yield.

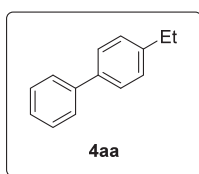

<sup>1</sup>H NMR (CDCl<sub>3</sub>, 600 MHz, rt):  $\delta$  1.29 (t,  $J$  = 7.8 Hz, 3H), 2.71 (q,  $J$  = 7.8 Hz, 2H), 7.29 (d,  $J$  = 7.8 Hz, 2H), 7.32-7.35 (m, 1H), 7.42-7.45 (m, 2H), 7.52-7.54 (m, 2H), 7.59-7.60 (m, 2H); <sup>13</sup>C{<sup>1</sup>H} NMR (CDCl<sub>3</sub>, 151 MHz, rt)  $\delta$  15.7, 28.7, 127.10, 127.16, 127.22, 128.4, 128.8, 138.8, 141.3, 143.5.

### 4-Ethylbenzonitrile (4ba).<sup>2</sup>

Yield was 68% (11.1 mg).

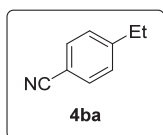

<sup>1</sup>H NMR (CDCl<sub>3</sub>, 600 MHz, rt):  $\delta$  1.25 (t,  $J$  = 7.8 Hz, 3H), 2.71 (q,  $J$  = 7.6 Hz, 2H), 7.29 (d,  $J$  = 9.0 Hz, 2H), 7.57 (d,  $J$  = 9.0 Hz, 2H); <sup>13</sup>C{<sup>1</sup>H} NMR (CDCl<sub>3</sub>, 151 MHz, rt)  $\delta$  15.2, 29.2, 109.6, 119.3, 128.8, 132.3, 149.9.

### Methyl 4-ethylbenzoate (4ca).<sup>2</sup>

Yield was 54% (11.0 mg).

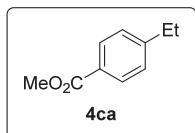

<sup>1</sup>H NMR (CDCl<sub>3</sub>, 600 MHz, rt):  $\delta$  1.25 (t,  $J$  = 7.8 Hz, 3H), 2.70 (q,  $J$  = 7.4 Hz, 2H), 3.90 (s, 3H), 7.26 (d,  $J$  = 8.4 Hz, 2H), 7.96 (d,  $J$  = 8.4 Hz, 2H); <sup>13</sup>C{<sup>1</sup>H} NMR (CDCl<sub>3</sub>, 151 MHz, rt)  $\delta$  15.4, 29.1, 52.1, 127.6, 128.0, 129.8, 149.9, 167.4.

### 1-Ethyl-4-(methylsulfonyl)benzene (4da).<sup>3</sup>

Yield was 51% (11.8 mg).

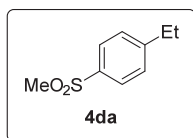

$^1\text{H}$  NMR ( $\text{CDCl}_3$ , 600 MHz, rt):  $\delta$  1.27 (t,  $J = 7.8$  Hz, 3H), 2.75 (q,  $J = 7.6$  Hz, 2H), 3.04 (s, 3H), 7.39 (d,  $J = 9.0$  Hz, 2H), 7.85 (d,  $J = 8.4$  Hz, 2H);  $^{13}\text{C}\{^1\text{H}\}$  NMR ( $\text{CDCl}_3$ , 151 MHz, rt)  $\delta$  15.3, 29.0, 44.8, 127.6, 129.0, 138.0, 150.9.

### 1-*n*-Butyl-4-ethylbenzene (4ea).<sup>4</sup>

Yield was 61% (12.4 mg).

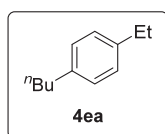

$^1\text{H}$  NMR ( $\text{CDCl}_3$ , 600 MHz, rt):  $\delta$  0.92 (t,  $J = 7.2$  Hz, 3H), 1.23 (t,  $J = 7.5$  Hz, 3H), 1.36 (sext,  $J = 7.4$  Hz, 2H), 1.55-1.63 (m, 2H), 2.58 (t,  $J = 7.8$  Hz, 2H), 2.62 (q,  $J = 7.6$  Hz, 2H), 7.09-7.12 (m, 4H);  $^{13}\text{C}\{^1\text{H}\}$  NMR ( $\text{CDCl}_3$ , 151 MHz, rt)  $\delta$  14.1, 15.8, 22.6, 28.6, 33.9, 35.4, 127.8, 128.5, 140.2, 141.5.

### 1-*n*-Butoxy-4-ethylbenzene (4fa).<sup>5</sup>

Yield was 52% (11.6 mg).

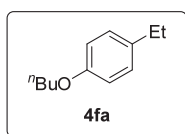

$^1\text{H}$  NMR ( $\text{CDCl}_3$ , 600 MHz, rt):  $\delta$  0.97 (t,  $J = 7.5$  Hz, 3H), 1.21 (t,  $J = 7.8$  Hz, 3H), 1.43-1.51 (m, 2H), 1.74-1.77 (m, 2H), 2.59 (q,  $J = 7.6$  Hz, 2H), 3.94 (t,  $J = 6.6$  Hz, 2H), 6.83 (d,  $J = 9.0$  Hz, 2H), 7.10 (d,  $J = 9.0$  Hz, 2H);  $^{13}\text{C}\{^1\text{H}\}$  NMR ( $\text{CDCl}_3$ , 151 MHz, rt)  $\delta$  14.0, 16.0, 19.4, 28.1, 31.6, 67.8, 114.5, 128.8, 136.3, 157.3.

### 3-Ethylbiphenyl (4ga).<sup>1</sup>

Yield was 71% (16.2 mg).

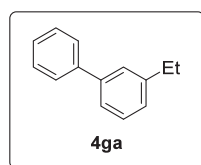

$^1\text{H}$  NMR ( $\text{CDCl}_3$ , 600 MHz, rt):  $\delta$  1.30 (t,  $J = 7.8$  Hz, 3H), 2.73 (q,  $J = 7.6$  Hz, 2H), 7.20 (d,  $J = 7.2$  Hz, 1H), 7.33-7.38 (m, 2H), 7.41-7.46 (m, 4H), 7.60 (dd,  $J = 8.4, 1.2$  Hz, 2H);  $^{13}\text{C}\{^1\text{H}\}$  NMR ( $\text{CDCl}_3$ , 151 MHz, rt)  $\delta$  15.8, 29.1, 124.7, 127.0, 127.28, 127.31, 127.35, 127.39, 128.83, 128.87, 128.89, 141.4, 141.6, 144.9.

### 2-Ethylbiphenyl (4ha).<sup>1</sup>

Yield was 36% (8.2 mg).

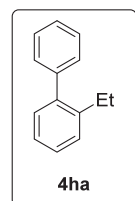

$^1\text{H}$  NMR ( $\text{CDCl}_3$ , 600 MHz, rt):  $\delta$  1.10 (t,  $J = 7.8$  Hz, 3H), 2.60 (q,  $J = 7.6$  Hz, 2H), 7.18-7.42 (m, 9H);  $^{13}\text{C}\{^1\text{H}\}$  NMR ( $\text{CDCl}_3$ , 151 MHz, rt)  $\delta$  15.8, 26.3, 125.7, 126.9, 127.3, 127.4, 127.6, 128.1, 128.7, 128.9, 129.4, 130.1, 141.75, 141.77.

### 5-Ethyl-1,2,3-trimethoxybenzene (4ia).<sup>6</sup>

Yield was 68% (16.6 mg).

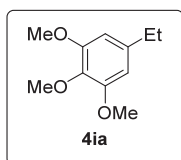

<sup>1</sup>H NMR (CDCl<sub>3</sub>, 600 MHz, rt):  $\delta$  1.24 (t,  $J$  = 7.5 Hz, 3H), 2.60 (q,  $J$  = 7.6 Hz, 2H), 3.82 (s, 3H), 3.86 (s, 6H), 6.42 (s, 2H); <sup>13</sup>C {<sup>1</sup>H} NMR (CDCl<sub>3</sub>, 151 MHz, rt)  $\delta$  15.8, 29.4, 56.2, 61.0, 104.8, 128.9, 136.0, 153.2.

### 6-Ethyl-1,4-benzodioxane (4ja).<sup>7</sup>

Yield was 69% (14.2 mg).

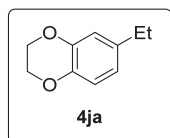

<sup>1</sup>H NMR (CDCl<sub>3</sub>, 600 MHz, rt):  $\delta$  1.20 (t,  $J$  = 7.8 Hz, 3H), 2.55 (q,  $J$  = 7.6 Hz, 2H), 4.24 (m, 4H), 6.67 (dd,  $J$  = 8.1, 2.1 Hz, 1H), 6.71 (d,  $J$  = 1.8 Hz, 1H), 6.78 (d,  $J$  = 7.8 Hz, 1H); <sup>13</sup>C {<sup>1</sup>H} NMR (CDCl<sub>3</sub>, 151 MHz, rt)  $\delta$  15.9, 28.3, 64.5, 64.6, 116.6,

117.1, 120.9, 137.8, 141.6, 143.4.

### 1-Ethyl-naphthalene (4ka).<sup>1</sup>

Yield was 70% (13.7 mg).

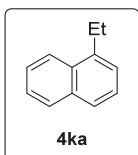

<sup>1</sup>H NMR (CDCl<sub>3</sub>, 600 MHz, rt):  $\delta$  1.39 (t,  $J$  = 7.5 Hz, 3H), 3.12 (q,  $J$  = 7.2 Hz, 2H), 7.34 (d,  $J$  = 6.6 Hz, 1H), 7.41 (t,  $J$  = 6.9 Hz, 1H), 7.46-7.53 (m, 2H), 7.71 (d,  $J$  = 8.4 Hz, 1H), 7.86 (d,  $J$  = 7.8 Hz, 1H), 8.06 (d,  $J$  = 8.4 Hz, 1H); <sup>13</sup>C {<sup>1</sup>H} NMR (CDCl<sub>3</sub>, 151 MHz, rt)  $\delta$  15.2, 26.0, 123.9, 125.0, 125.5, 125.8 (2C), 126.5, 128.9, 131.9, 133.9,

140.4.

### 2-Ethyl-naphthalene (4la).<sup>1</sup>

Yield was 74% (14.5 mg).

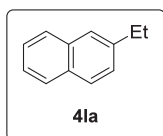

<sup>1</sup>H NMR (CDCl<sub>3</sub>, 600 MHz, rt):  $\delta$  1.33 (t,  $J$  = 7.5 Hz, 3H), 2.82 (q,  $J$  = 7.6 Hz, 2H), 7.35 (dd,  $J$  = 8.4, 1.8 Hz, 1H), 7.39-7.46 (m, 2H), 7.63 (s, 1H), 7.76-7.81 (m, 3H); <sup>13</sup>C {<sup>1</sup>H} NMR (CDCl<sub>3</sub>, 151 MHz, rt)  $\delta$  15.7, 29.2, 123.6, 125.1, 125.7, 126.0, 127.2,

127.5, 127.7, 127.9, 131.0, 133.8, 141.9.

### 9-Ethylanthracene (4ma).<sup>8</sup>

Yield was 56% (14.4 mg).

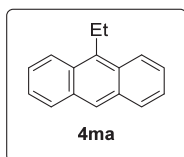

$^1\text{H}$  NMR ( $\text{CDCl}_3$ , 600 MHz, rt):  $\delta$  1.45 (t,  $J = 7.8$  Hz, 3H), 3.65 (q,  $J = 7.8$  Hz, 2H), 7.45-7.47 (m, 2H), 7.49-7.52 (m, 2H), 8.01 (d,  $J = 7.8$  Hz, 2H), 8.28 (d,  $J = 8.4$  Hz, 2H), 8.34 (s, 1H);  $^{13}\text{C}\{^1\text{H}\}$  NMR ( $\text{CDCl}_3$ , 151 MHz, rt)  $\delta$  15.7, 21.3, 124.5, 124.9, 125.5, 125.6, 129.3, 129.4, 131.8, 136.8.

### 1-Ethyl-9H-fluorene (4na).<sup>9</sup>

Yield was 78% (19.0 mg).

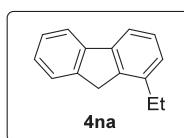

$^1\text{H}$  NMR ( $\text{CDCl}_3$ , 600 MHz, rt):  $\delta$  1.32 (t,  $J = 7.5$  Hz, 3H), 2.79 (q,  $J = 7.6$  Hz, 2H), 3.85 (s, 2H), 7.17 (d,  $J = 7.8$  Hz, 1H), 7.30 (td,  $J = 7.2, 1.2$  Hz, 1H), 7.34-7.38 (m, 2H), 7.56 (d,  $J = 7.2$  Hz, 1H), 7.65 (d,  $J = 7.2$  Hz, 1H), 7.78 (d,  $J = 7.8$  Hz, 1H);  $^{13}\text{C}\{^1\text{H}\}$  NMR ( $\text{CDCl}_3$ , 151 MHz, rt)  $\delta$  14.4, 26.4, 35.6, 117.6, 120.1, 125.1, 126.1, 126.7, 126.8, 127.4, 140.5, 141.5, 141.6, 142.2, 143.2.

### 2-Ethylbenzo[*b*]thiophene (4pa).<sup>10</sup>

Yield was 70% (14.1 mg).

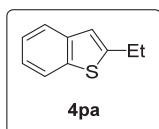

$^1\text{H}$  NMR ( $\text{CDCl}_3$ , 600 MHz, rt):  $\delta$  1.38 (t,  $J = 7.5$  Hz, 3H), 2.94 (qd,  $J = 7.6, 1.2$  Hz, 2H), 7.01 (d,  $J = 0.6$  Hz, 1H), 7.23-7.26 (m, 1H), 7.28-7.32 (m, 1H), 7.66 (d,  $J = 7.8$  Hz, 1H), 7.76 (dd,  $J = 7.8, 0.6$  Hz, 1H);  $^{13}\text{C}\{^1\text{H}\}$  NMR ( $\text{CDCl}_3$ , 151 MHz, rt)  $\delta$  15.6, 24.3, 119.8, 122.3, 122.8, 123.5, 124.2, 139.3, 140.4, 148.5.

### 2-Ethylbenzofuran (4qa).<sup>7</sup>

Yield was 28% (5.1 mg).

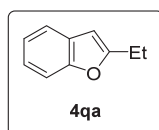

$^1\text{H}$  NMR ( $\text{CDCl}_3$ , 600 MHz, rt):  $\delta$  1.34 (t,  $J = 7.8$  Hz, 3H), 2.80 (qd,  $J = 7.5, 0.9$  Hz, 2H), 6.38 (d,  $J = 0.6$  Hz, 1H), 7.16-7.22 (m, 2H), 7.41 (dd,  $J = 7.8, 0.6$  Hz, 1H), 7.48 (dd,  $J = 6.3, 0.9$  Hz, 1H);  $^{13}\text{C}\{^1\text{H}\}$  NMR ( $\text{CDCl}_3$ , 151 MHz, rt)  $\delta$  12.0, 21.9, 101.1, 110.8, 120.3, 122.5, 123.2, 129.1, 154.8, 161.1.

### (*E*)- and (*Z*)-1,2-Diphenyl-1-butene (4ra).<sup>11</sup>(for (*E*)-isomer), <sup>12</sup>(for (*Z*)-isomer)

Yield was 66% (*E*:*Z* = 0.93:1) (17.2 mg).

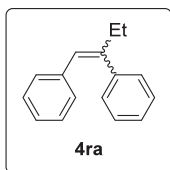

$^1\text{H}$  NMR ( $\text{CDCl}_3$ , 600 MHz, rt):  $\delta$  1.05-1.08 (m, (*E*) and (*Z*)), 2.51 (qd,  $J = 7.4$ , 1.5 Hz, (*Z*)), 2.75 (q,  $J = 7.6$  Hz, (*E*)), 6.43 (s, (*Z*)), 6.69 (s, (*E*)), 6.92 (d,  $J = 7.2$  Hz, (*Z*)), 7.04-7.10 (m, (*Z*)), 7.15 (d,  $J = 7.2$  Hz, (*Z*)), 7.24-7.48 (m, (*E*) and (*Z*));

$^{13}\text{C}\{^1\text{H}\}$  NMR ( $\text{CDCl}_3$ , 151 MHz, rt)  $\delta$  13.0 (*Z*), 13.6 (*E*), 23.4 (*E*), 33.7 (*Z*), 125.2 (*Z*), 126.2 (*Z*), 126.7 (*E*), 126.8 (*Z*), 126.9 (*E*), 127.3 (*E*), 127.7 (*Z*), 127.9 (*E*), 128.4 (*Z*), 128.5 (*E*), 128.6 (*E*), 128.7 (*Z*), 128.9 (*E*), 129.1 (*Z*), 137.7 (*Z*), 138.4 (*E*), 141.6 (*Z*), 142.8 (*E*), 144.6 (*E*), 145.1 (*Z*).

**Representative Procedure for Decarbonylative C(aryl)–F Bond Alkylation of 1a with Trimethylboroxine: Synthesis of 4-Methylbiphenyl (4ab).**<sup>13</sup> To a 20 mL Schlenk tube, were added  $\text{Ni}(\text{cod})_2$  (20 mol %, 6.9 mg, 0.025 mmol), DPPE (20 mol %, 10.0 mg, 0.025 mmol), and toluene (500  $\mu\text{L}$ ). Subsequently, CsF (38.0 mg, 0.25 mmol, 2 equiv),  $(\text{MeBO})_3$  (**2b**) (34.9  $\mu\text{L}$ , 0.25 mmol, 2 equiv), and biphenyl-4-carbonyl fluoride (**1a**) (25.0 mg, 0.125 mmol) were added, and the resulting mixture was heated at 130  $^\circ\text{C}$ . After 24 h, the reaction mixture was quenched with 1 M HCl, extracted with EtOAc, washed by brine, and dried over  $\text{MgSO}_4$ . After the volatiles were removed under vacuum, the crude product was purified by column chromatography (hexane:Et<sub>2</sub>O = 10:1) to afford **4ab** (10 mg, 0.061 mmol) in 49% yield.

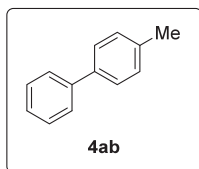

$^1\text{H}$  NMR ( $\text{CDCl}_3$ , 600 MHz, rt):  $\delta$  2.40 (s, 3H), 7.26 (d,  $J = 7.8$  Hz, 2H), 7.31-7.34 (m, 1H), 7.43 (t,  $J = 7.5$  Hz, 2H), 7.50 (d,  $J = 8.4$  Hz, 2H), 7.59 (dd,  $J = 8.4$ , 1.2 Hz, 2H);  $^{13}\text{C}\{^1\text{H}\}$  NMR ( $\text{CDCl}_3$ , 151 MHz, rt)  $\delta$  21.2, 127.12, 127.14, 127.3, 128.9, 129.6, 137.2, 138.5, 141.3.

**Representative Procedure for the Palladium-Catalyzed *ortho*-C–H Arylation of 2-Naphthoic Acid (5): Synthesis of 3-Phenyl-2-naphthoic Acid (6a).**<sup>14</sup> To an oven-dried 20 mL Schlenk tube, were added  $\text{Pd}(\text{OAc})_2$  (11.2 mg, 0.05 mmol, 5 mol %),  $\text{Ag}_2\text{CO}_3$  (358 mg, 1.3 mmol, 1.3 equiv), 2-naphthoic acid (**5**) (172 mg, 1.0 mmol), iodobenzene (336  $\mu\text{L}$ , 3.0 mmol, 3.0 equiv), and AcOH (100  $\mu\text{L}$ ) under an argon atmosphere. After the reaction mixture was stirred at 145  $^\circ\text{C}$  for 6 h, it was cooled to room temperature and quenched with 1 M HCl. The mixture was filtrated by Celite®, and extracted with  $\text{CH}_2\text{Cl}_2$ , washed with brine, and dried over  $\text{MgSO}_4$ . After the volatiles were evaporated, the crude mixture was purified by column chromatography ( $\text{CH}_2\text{Cl}_2$ :EtOAc = 10:1), and the high-boiling starting material 2-naphthoic acid (**5**) was removed by bulb-to-bulb distillation (2 mmHg, 200  $^\circ\text{C}$ ) afforded **6a** (154 mg, 0.62 mmol) in 62% yield.

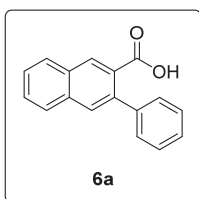

$^1\text{H}$  NMR ( $\text{CDCl}_3$ , 600 MHz, rt):  $\delta$  7.41-7.46 (m, 5H), 7.56 (td,  $J = 7.5$ , 1.2 Hz, 1H), 7.62 (td,  $J = 7.6$ , 1.4 Hz, 1H), 7.82 (s, 1H), 7.87 (d,  $J = 7.8$  Hz, 1H), 7.96 (d,  $J = 7.8$  Hz, 1H), 8.55 (s, 1H), The signal of carboxylic acid was not observed.;  $^{13}\text{C}\{^1\text{H}\}$  NMR ( $\text{CDCl}_3$ , 151 MHz, rt)  $\delta$  126.9, 127.3, 127.5, 127.8, 128.1, 128.78, 128.81, 128.9, 130.3, 131.5, 132.6, 134.8, 139.2, 141.2, 173.9.

### 3-(*p*-Tolyl)-2-naphthoic acid (6b).<sup>15</sup>

Yield was 49% (129 mg).

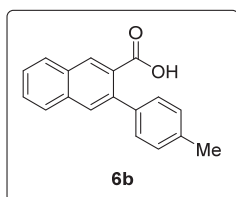

$^1\text{H}$  NMR ( $\text{CDCl}_3$ , 600 MHz, rt):  $\delta$  2.44 (s, 3H), 7.25 (d,  $J = 7.8$  Hz, 2H), 7.37 (d,  $J = 7.8$  Hz, 2H), 7.55 (td,  $J = 7.5$ , 1.2 Hz, 1H), 7.61 (td,  $J = 7.5$ , 1.2 Hz, 1H), 7.82 (s, 1H), 7.87 (d,  $J = 7.8$  Hz, 1H), 7.96 (d,  $J = 8.4$  Hz, 1H), 8.56 (s, 1H), The signal of carboxylic acid was not observed.;  $^{13}\text{C}\{^1\text{H}\}$  NMR ( $\text{CDCl}_3$ , 151 MHz, rt)  $\delta$  21.4, 126.8, 127.7, 127.9, 128.7, 128.8, 128.9, 129.0, 130.3, 131.5, 132.5, 134.9, 137.0, 138.3, 139.1, 173.9.

### 3-(*p*-Anisoyl)-2-naphthoic acid (6c).<sup>15</sup>

Yield was 45% (125 mg).

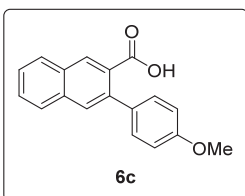

$^1\text{H}$  NMR ( $\text{CDCl}_3$ , 600 MHz, rt):  $\delta$  3.78 (s, 3H), 6.99 (d,  $J = 8.4$  Hz, 2H), 7.40 (d,  $J = 8.4$  Hz, 2H), 7.55 (td  $J = 7.5$ , 0.8 Hz, 1H), 7.61 (td,  $J = 7.6$ , 1.0 Hz, 1H), 7.81 (s, 1H), 7.86 (d,  $J = 8.4$  Hz, 1H), 7.95 (d,  $J = 8.4$  Hz, 1H), 8.56 (s, 1H), The signal of carboxylic acid was not observed.;  $^{13}\text{C}\{^1\text{H}\}$  NMR ( $\text{CDCl}_3$ , 151 MHz, rt)  $\delta$  55.3, 113.7, 126.8, 127.7, 127.8, 128.7, 128.9, 129.9, 130.2, 131.3, 132.5, 133.6, 134.9, 138.8, 159.0, 174.0.

### 3-(*p*-Trifluoromethylphenyl)-2-naphthoic acid (6d).<sup>15</sup>

Yield was 59% (187 mg).

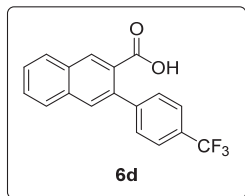

$^1\text{H}$  NMR ( $\text{CDCl}_3$ , 600 MHz, rt):  $\delta$  7.53 (d,  $J = 7.8$  Hz, 2H), 7.60 (td,  $J = 7.5$ , 1.2 Hz, 1H), 7.66 (td,  $J = 8.4$  Hz, 1.2 Hz, 1H), 7.68 (d,  $J = 7.8$  Hz, 2H), 7.78 (s, 1H), 7.88 (d,  $J = 7.8$  Hz, 1H), 7.99 (d,  $J = 8.4$  Hz, 1H), 8.64 (s, 1H), The signal of carboxylic acid was not observed.;  $^{13}\text{C}\{^1\text{H}\}$  NMR ( $\text{CDCl}_3$ , 151 MHz, rt)  $\delta$  124.5 (q,  $^1J_{\text{C-F}} = 272$  Hz), 125.0 (q,  $^2J_{\text{C-F}} = 4$  Hz), 126.7, 127.5, 128.0, 129.1, 129.2, 129.3, 129.5, 130.7, 131.9, 133.3, 134.9, 138.1, 145.2, 172.6.;  $^{19}\text{F}\{^1\text{H}\}$  NMR ( $\text{CDCl}_3$ , 564 MHz, rt)  $\delta$  -62.3.

## 2. Optimization of the Reaction Conditions

**Table S1.** Screening of ligand and reaction temperature

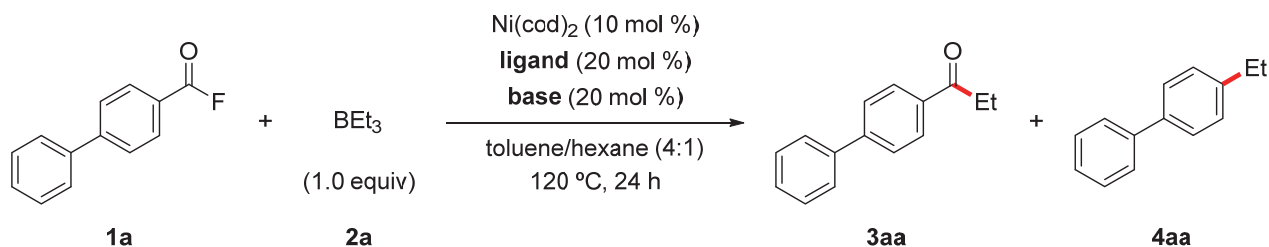

| Entry             | ligand                             | base     | NMR yield (%) |                      |
|-------------------|------------------------------------|----------|---------------|----------------------|
|                   |                                    |          | 3aa           | 4aa                  |
| 1                 | none                               | none     | 0             | 0                    |
| 2                 | $\text{PPh}_3$                     | none     | 0             | 21                   |
| 3                 | $\text{PCy}_3$                     | none     | 22            | 26                   |
| 4                 | $\text{P}(\text{C}_6\text{F}_5)_3$ | none     | 0             | 0                    |
| 5                 | $\text{P}(\text{mesityl})_3$       | none     | 0             | 0                    |
| 6 <sup>a</sup>    | DPPM                               | none     | 0             | 36                   |
| 7 <sup>a</sup>    | DPPE                               | none     | 0             | 83 (78) <sup>b</sup> |
| 8 <sup>a</sup>    | DPPP                               | none     | 0             | 28                   |
| 9 <sup>a</sup>    | DPPB                               | none     | 0             | 25                   |
| 10 <sup>a</sup>   | DCPE                               | none     | trace         | 38                   |
| 11 <sup>a</sup>   | DPPBz                              | none     | 0             | 45                   |
| 12 <sup>a</sup>   | DPPF                               | none     | 0             | 38                   |
| 13 <sup>a</sup>   | Xantphos                           | none     | 0             | 16                   |
| 14                | Xphos                              | none     | 0             | 18                   |
| 15 <sup>a</sup>   | dtbpy                              | none     | 12            | 23                   |
| 16                | $\text{IPr}\cdot\text{HCl}$        | pyridine | 27            | trace                |
| 17                | $\text{ICy}\cdot\text{HCl}$        | pyridine | 27            | trace                |
| 18 <sup>a,c</sup> | DPPE                               | none     | 0             | 85 (85) <sup>b</sup> |
| 19 <sup>a,d</sup> | DPPE                               | none     | 0             | 77 (73) <sup>b</sup> |
| 20 <sup>a,e</sup> | DPPE                               | none     | 0             | 28                   |

DCPE = 1,2-bis(diclohexylphosphino)ethane, DPPBz =

1,2-bis(diphenylphosphino)benzene,  $\text{IPr}\cdot\text{HCl}$  =

1,3-bis(2,6-diisopropylphenyl)imidazolium chloride,  $\text{ICy}\cdot\text{HCl}$

= 1,3-dicyclohexylimidazolium chloride

<sup>a</sup> 10 mol % of ligand was used. <sup>b</sup> An isolated yield. <sup>c</sup> Run

at 130 °C for 24 h. <sup>d</sup> Run at 140 °C for 24 h. <sup>e</sup> Run at 110

°C for 24 h.



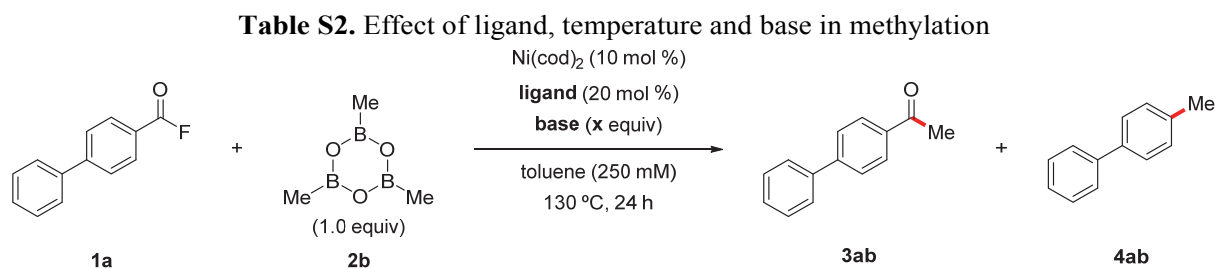

| Entry             | ligand                            | base                                     | NMR yield (%) |                     |
|-------------------|-----------------------------------|------------------------------------------|---------------|---------------------|
|                   |                                   |                                          | 3aa           | 4ab                 |
| 1                 | none                              | CsF (1 equiv)                            | 0             | 1                   |
| 2                 | PPh <sub>3</sub>                  | CsF (1 equiv)                            | 0             | 4                   |
| 3                 | PCy <sub>3</sub>                  | CsF (1 equiv)                            | 0             | 13                  |
| 4                 | P(C <sub>6</sub> F <sub>5</sub> ) | CsF (1 equiv)                            | 0             | 0                   |
| 5                 | P(mesit)                          | CsF (1 equiv)                            | 0             | 0                   |
| 6 <sup>a</sup>    | DPPM                              | CsF (1 equiv)                            | 6             | 15                  |
| 7 <sup>a</sup>    | DPPE                              | CsF (1 equiv)                            | trace         | 30                  |
| 8 <sup>a</sup>    | DPPP                              | CsF (1 equiv)                            | 3             | 9                   |
| 9 <sup>a</sup>    | DPPB                              | CsF (1 equiv)                            | 3             | <3                  |
| 10 <sup>a</sup>   | DCPE                              | CsF (1 equiv)                            | 4             | 20                  |
| 11 <sup>a</sup>   | DPPBz                             | CsF (1 equiv)                            | trace         | 29                  |
| 12 <sup>a</sup>   | DPPF                              | CsF (1 equiv)                            | trace         | 4                   |
| 13 <sup>a</sup>   | Xantph                            | CsF (1 equiv)                            | 2             | 7                   |
| 14                | Xphos                             | CsF (1 equiv)                            | 3             | <9                  |
| 15 <sup>a</sup>   | dtbpy                             | CsF (1 equiv)                            | 6             | 29                  |
| 16                | IPr•HCl                           | CsF (1 equiv) + pyridine                 | 2             | 2                   |
| 17                | ICy•HC                            | CsF (1 equiv) + pyridine                 | 3             | 2                   |
| 18 <sup>a,b</sup> | DPPE                              | CsF (1 equiv)                            | trace         | 30                  |
| 19 <sup>a,c</sup> | DPPE                              | CsF (2 equiv)                            | trace         | 50(49) <sup>d</sup> |
| 20 <sup>a,c</sup> | DPPE                              | TBAF in THF (1.0 M, 2)                   | 0             | trace               |
| 21 <sup>a,c</sup> | DPPE                              | KF (2 equiv)                             | 0             | 32                  |
| 22 <sup>a,c</sup> | DPPE                              | KOH (2 equiv)                            | 0             | 21                  |
| 23 <sup>a,c</sup> | DPPE                              | K <sub>2</sub> CO <sub>3</sub> (2 equiv) | 0             | 21                  |
| 24 <sup>a,c</sup> | DPPE                              | K <sub>3</sub> PO <sub>4</sub> (2 equiv) | 0             | 18                  |
| 25 <sup>a,c</sup> | DPPE                              | pyridine (2 equiv)                       | 0             | 9                   |
| 26 <sup>a,c</sup> | DPPE                              | NEt <sub>3</sub> (2 equiv)               | 0             | 22                  |

DCPE = 1,2-bis(diclohexylphosphino)ethane, DPPBz = 1,2-bis(diphenylphosphino)benzene, IPr•HCl = 1,3-bis(2,6-diisopropylphenyl)imidazolium chloride, ICy•HCl = 1,3-dicyclohexylimidazolium chloride

<sup>a</sup> 10 mol % of ligand was used. <sup>b</sup> Ni(cod)<sub>2</sub> (20 mol %), DPPE (20 mol %). <sup>c</sup> Ni(cod)<sub>2</sub> (20 mol %), DPPE (20 mol %), (MeBO)<sub>3</sub> (2 equiv). <sup>d</sup> An isolated yield.

**Table S3.** Effect of organometallic reagents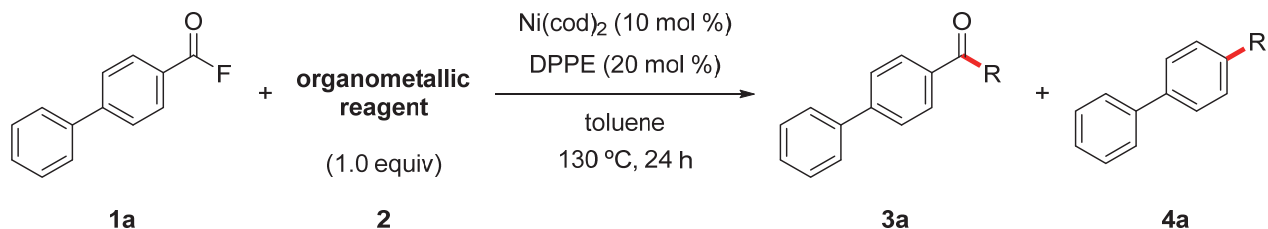

| Entry          | organometallic reagent                                | NMR yield (%) |                      |
|----------------|-------------------------------------------------------|---------------|----------------------|
|                |                                                       | 3a            | 4a                   |
| 1              | SnMe <sub>4</sub>                                     | 0             | 0                    |
| 2              | SiMe <sub>4</sub>                                     | 0             | 0                    |
| 3              | (MeBO) <sub>3</sub> ( <b>2b</b> )                     | 0             | 2                    |
| 4 <sup>a</sup> | (MeBO) <sub>3</sub> ( <b>2b</b> )                     | 3             | 20                   |
| 5 <sup>b</sup> | (MeBO) <sub>3</sub> ( <b>2b</b> )                     | trace         | 30                   |
| 6 <sup>c</sup> | (MeBO) <sub>3</sub> ( <b>2b</b> )                     | 0             | 50 (49) <sup>d</sup> |
| 7              | <sup>n</sup> BuB(OH) <sub>2</sub>                     | 0             | 0                    |
| 8 <sup>a</sup> | <sup>n</sup> BuB(OH) <sub>2</sub>                     | 0             | 0                    |
| 9              | <sup>n</sup> C <sub>10</sub> H <sub>21</sub> -(9-BBN) | 0             | 0                    |

<sup>a</sup> CsF (3 equiv). <sup>b</sup> CsF (1 equiv). <sup>c</sup> Ni(cod)<sub>2</sub> (20 mol %), DPPE (20 mol %), **2b** (2 equiv), CsF (2 equiv). <sup>d</sup> An isolated yield.

**Table S4.** Effect of nickel precatalyst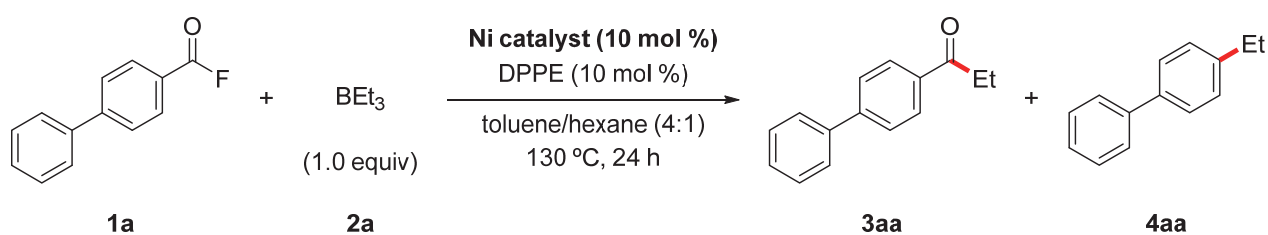

| Entry            | Ni catalyst                             | NMR yield (%) |     |
|------------------|-----------------------------------------|---------------|-----|
|                  |                                         | 3aa           | 4aa |
| 1                | NiCl <sub>2</sub>                       | 0             | 0   |
| 2                | Ni(OAc) <sub>2</sub> •4H <sub>2</sub> O | 0             | 80  |
| 3 <sup>a,b</sup> | Ni(OAc) <sub>2</sub>                    | 0             | 30  |

<sup>a</sup> BEt<sub>3</sub> (**2a**) (1.2 equiv). <sup>b</sup> Ni(OAc)<sub>2</sub>•4H<sub>2</sub>O was heated with a heatgun under reduced pressure for 1-2 minutes before the reaction.

**Table S5.** Scope of acid derivatives

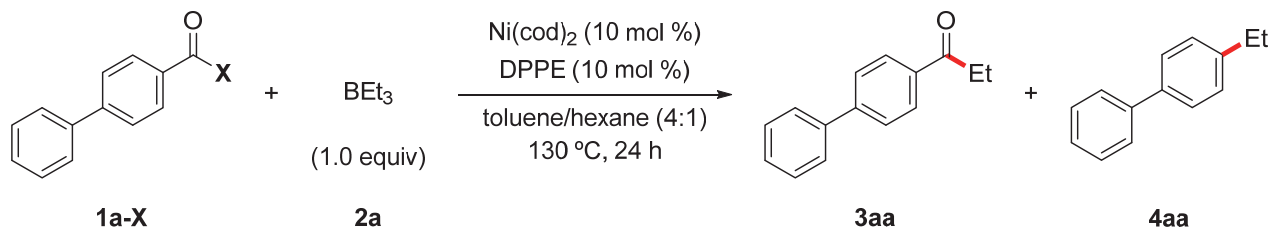

| Entry          | X              | NMR yield (%) |            |
|----------------|----------------|---------------|------------|
|                |                | <b>3aa</b>    | <b>4aa</b> |
| 1              | Cl (distilled) | 0             | 0          |
| 2              | OPh            | 0             | 0          |
| 3 <sup>a</sup> | SPh            | 0             | 0          |

<sup>a</sup> Decarbonylation of thioester through a C–S bond cleavage and following reductive elimination was only occurred.

### A Stoichiometric Reaction without a Nickel Catalyst

To an NMR tube, were added biphenyl-4-carbonyl fluoride (**1a**) (10.0 mg, 0.05 mmol), BEt<sub>3</sub> (**2a**) (1.0 M hexane solution, 50  $\mu$ L, 0.05 mmol) in toluene-*d*<sub>8</sub> (1 mL) under an argon atmosphere. After the solution mixture was heated at 130 °C for 24 h, <sup>11</sup>B{<sup>1</sup>H} and <sup>19</sup>F{<sup>1</sup>H} NMR were measured. The result clearly indicates that the preactivation of **1a** with **2a** did not occur under the standard conditions.

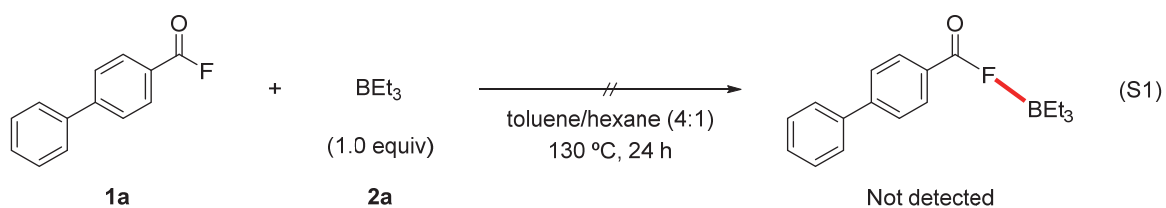

### Reaction with B<sup>n</sup>Bu<sub>3</sub>: Scope of Trialkylboranes

Decarbonylative alkylation with commercially available B<sup>n</sup>Bu<sub>3</sub> (**2c**) in THF solution was conducted. Unfortunately, the target 4-*n*-butylbiphenyl (**4ac**) was not detected at all. Based on this result, we assumed that Lewis acidity of B<sup>n</sup>Bu<sub>3</sub> would be drastically decreased by the formation of trialkylborane–THF complex.

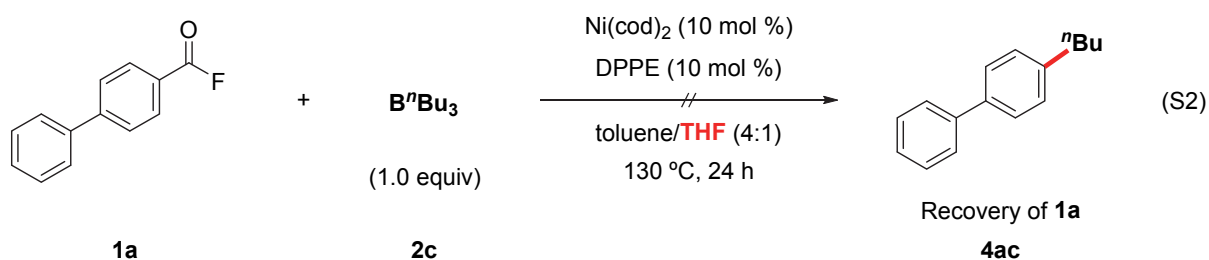



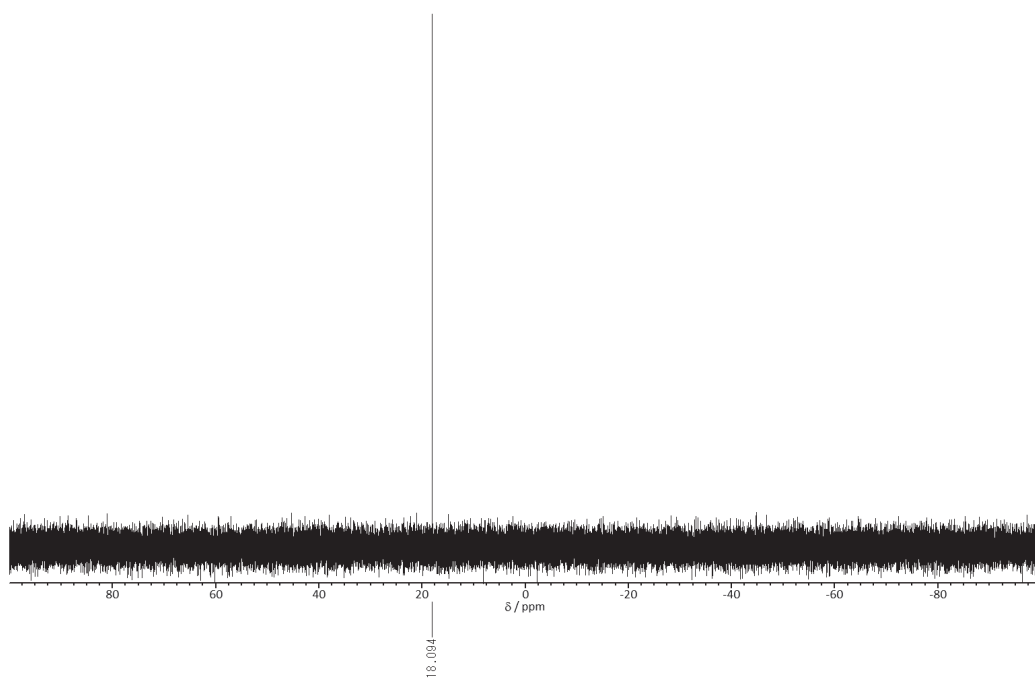

**Figure S1.**  $^1\text{H}$ ,  $^{13}\text{C}\{^1\text{H}\}$  and  $^{19}\text{F}\{^1\text{H}\}$  NMR spectra of compound **1a** (in  $\text{CDCl}_3$ , rt)

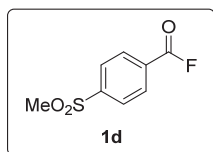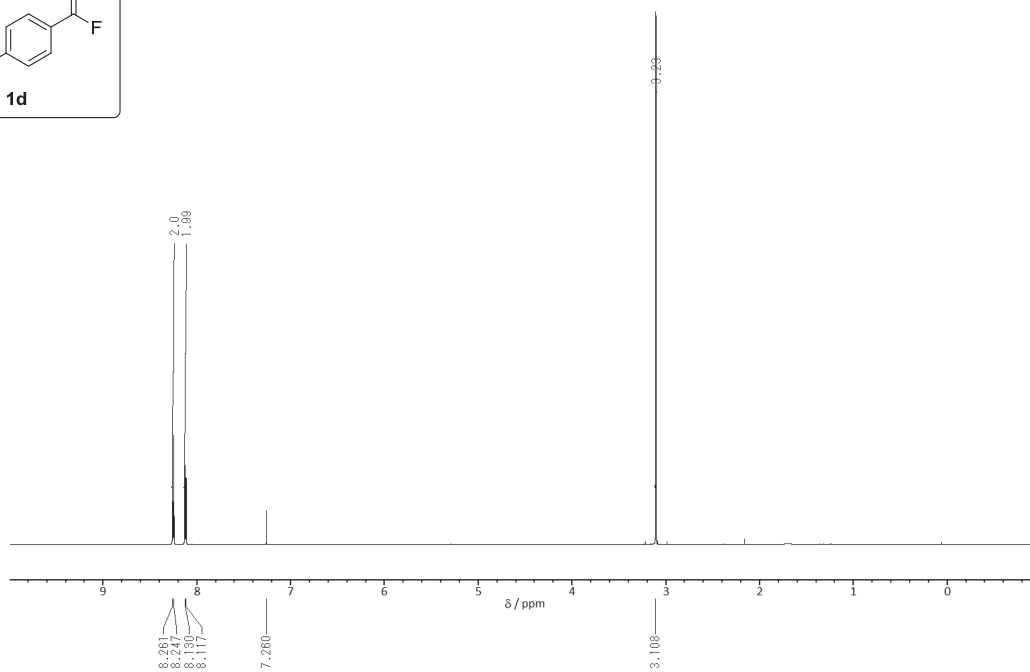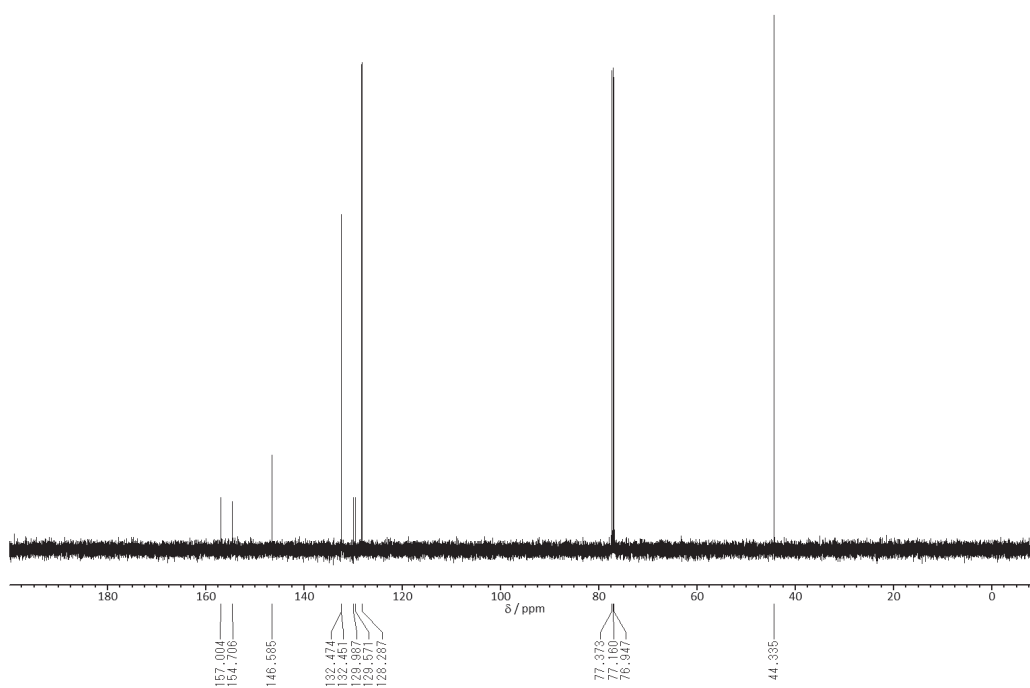

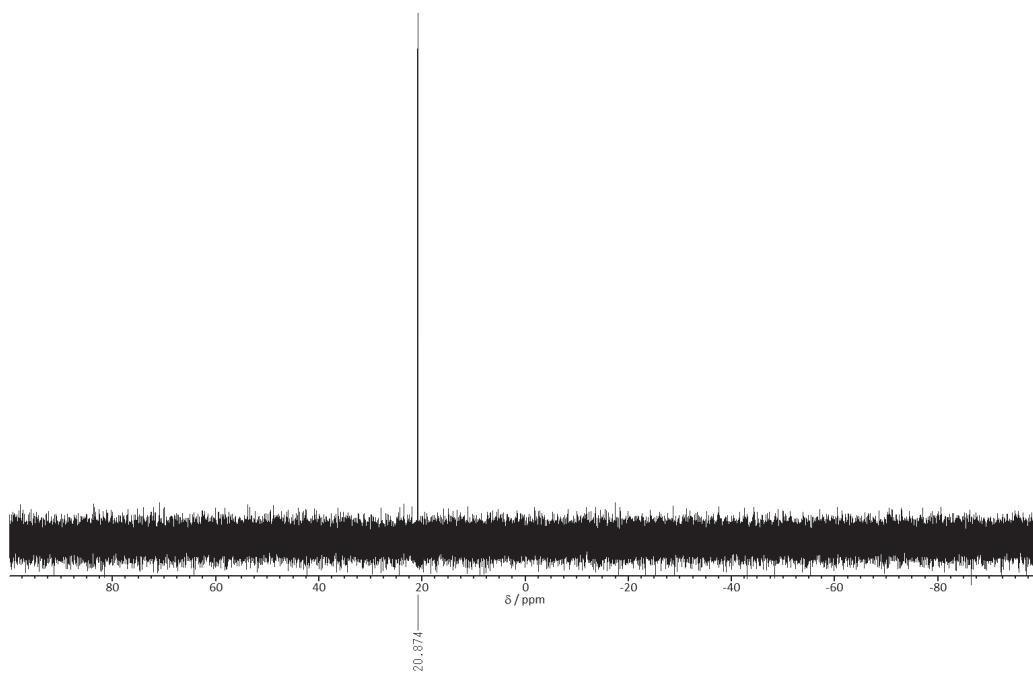

**Figure S2.**  $^1\text{H}$ ,  $^{13}\text{C}\{^1\text{H}\}$  and  $^{19}\text{F}\{^1\text{H}\}$  NMR spectra of compound **1d** (in  $\text{CDCl}_3$ , rt)



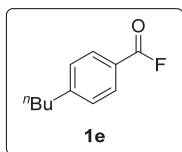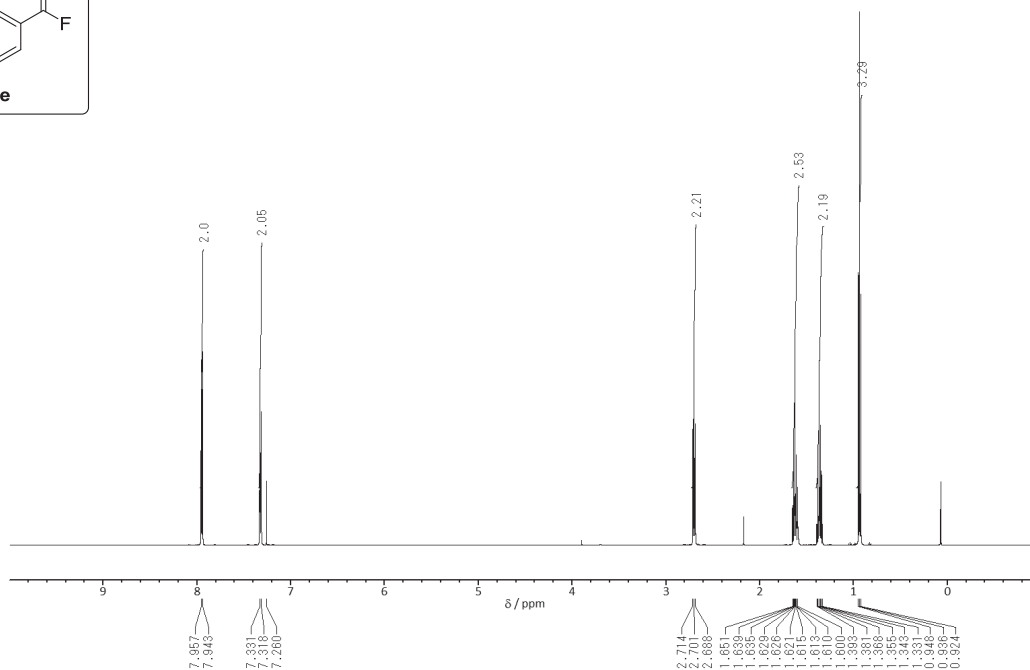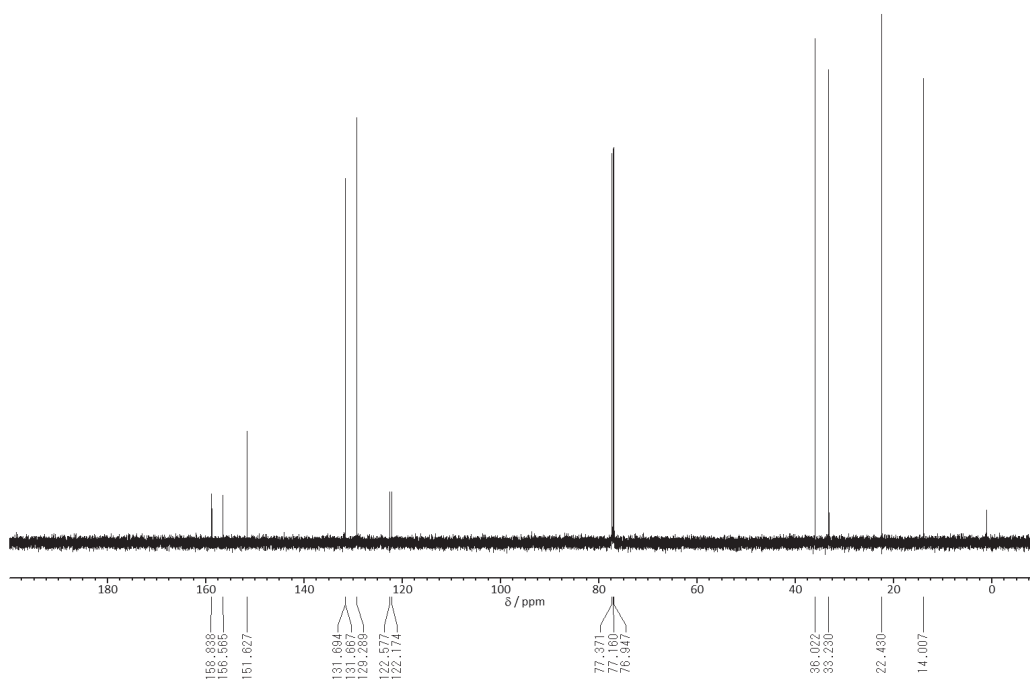

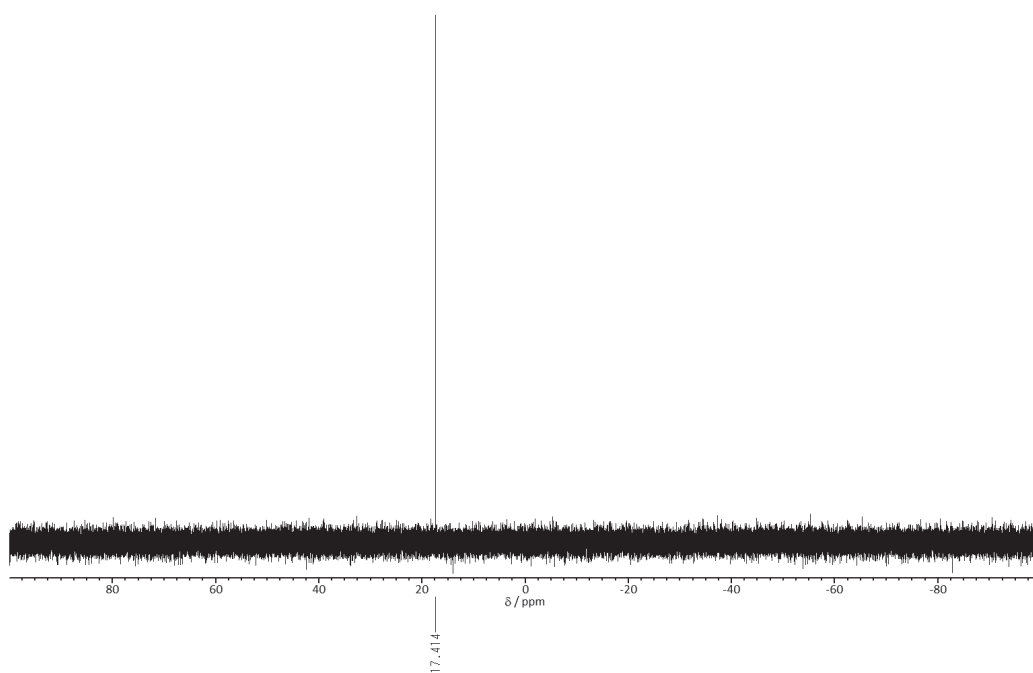

**Figure S3.**  $^1\text{H}$ ,  $^{13}\text{C}\{^1\text{H}\}$  and  $^{19}\text{F}\{^1\text{H}\}$  NMR spectra of compound **1e** (in  $\text{CDCl}_3$ , rt)

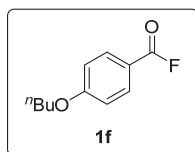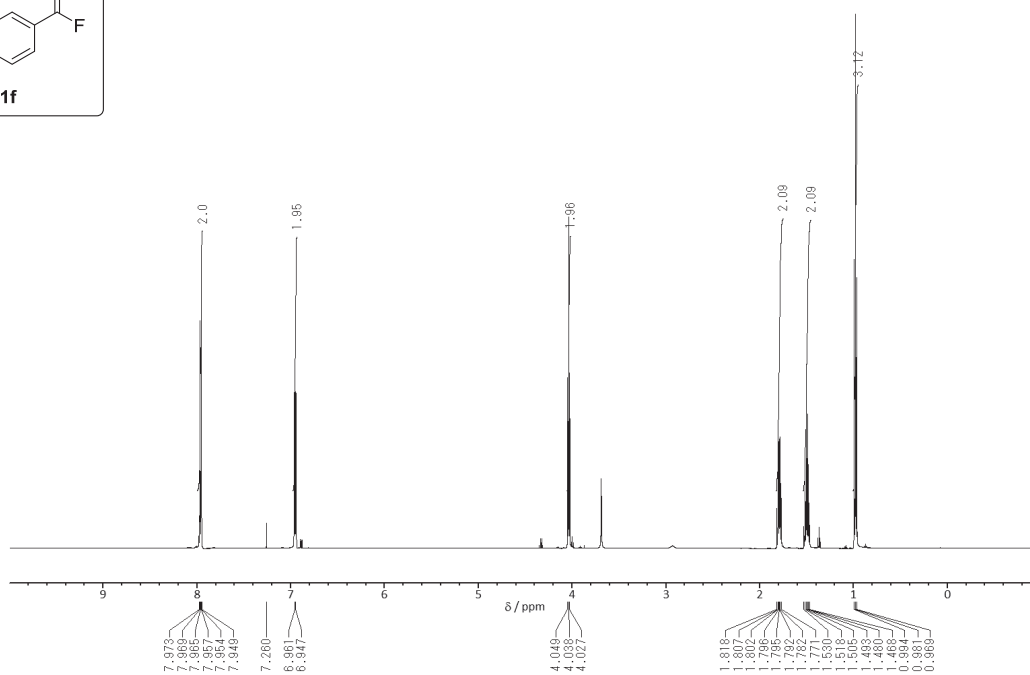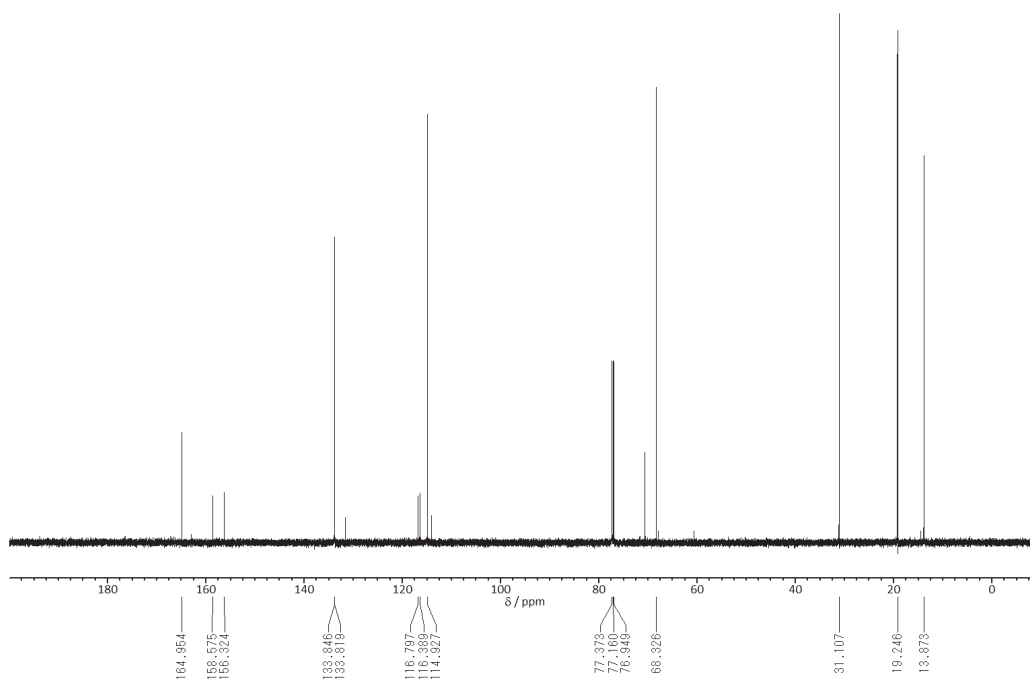

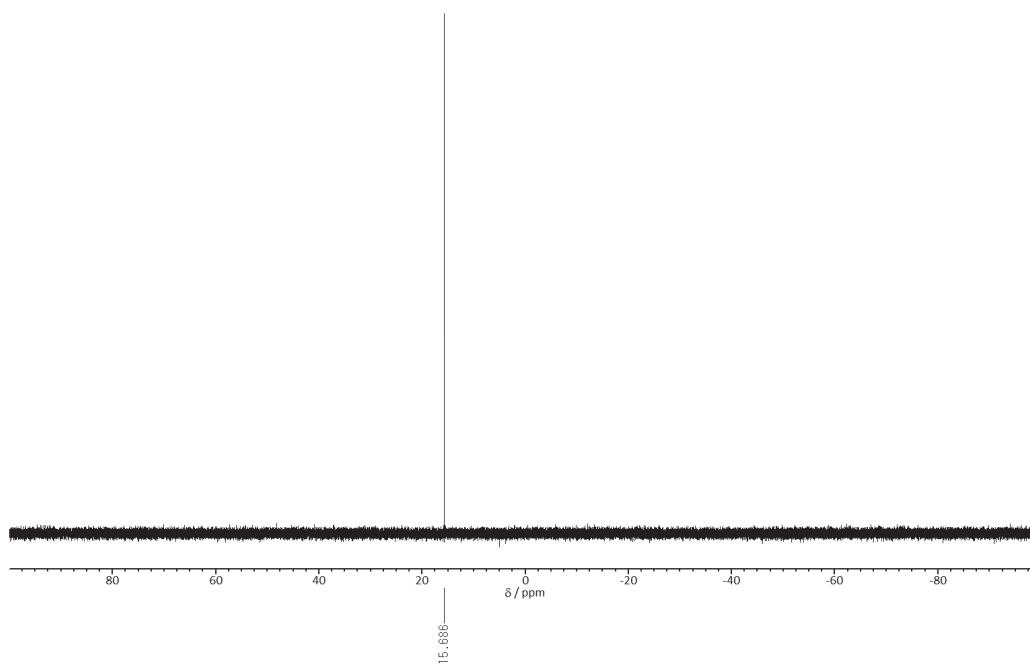

**Figure S4.**  $^1\text{H}$ ,  $^{13}\text{C}\{^1\text{H}\}$  and  $^{19}\text{F}\{^1\text{H}\}$  NMR spectra of compound **1f** (in  $\text{CDCl}_3$ , rt)

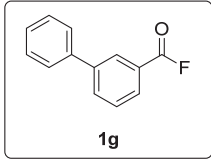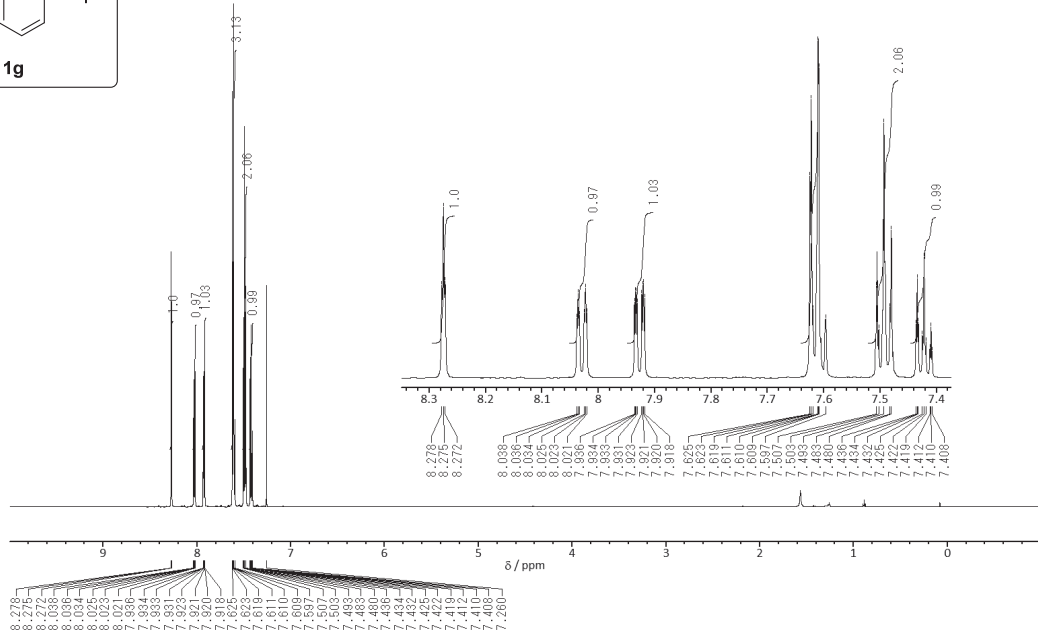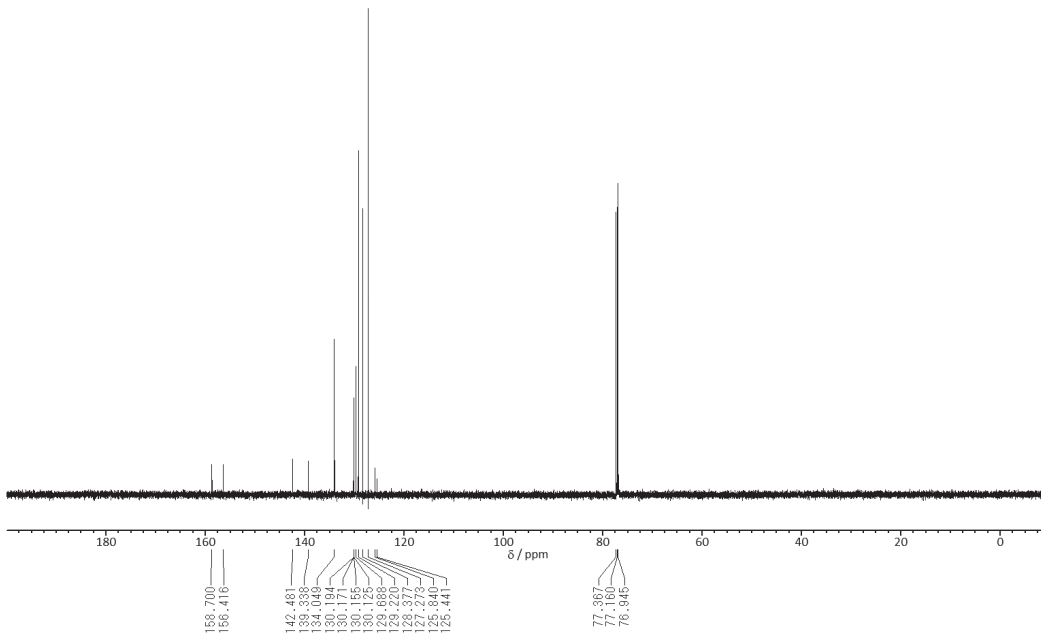

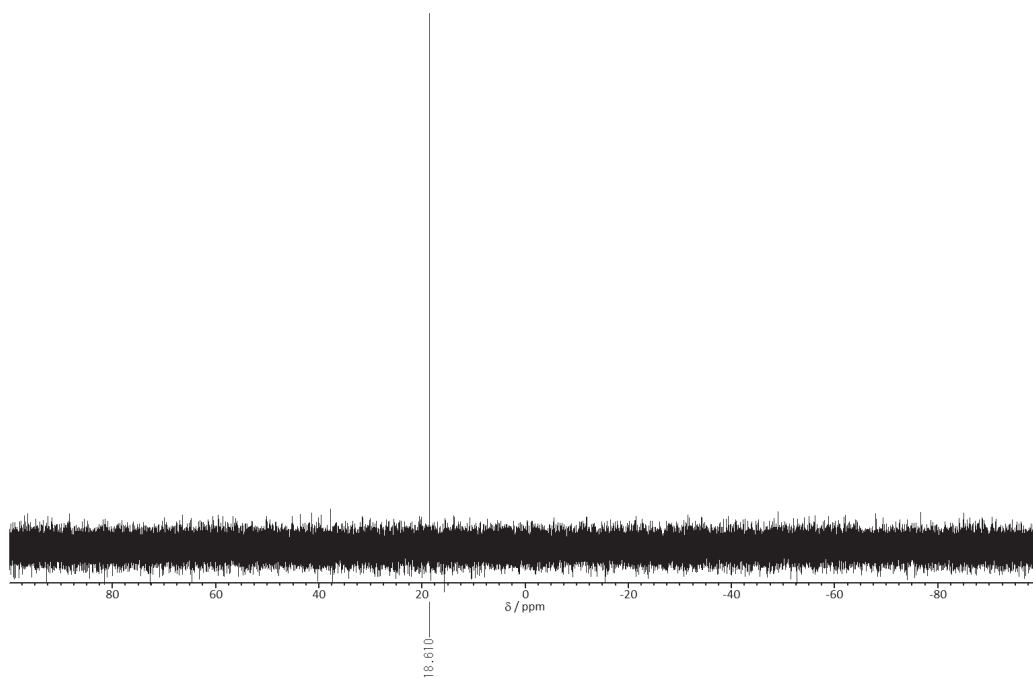

**Figure S5.**  $^1\text{H}$ ,  $^{13}\text{C}\{^1\text{H}\}$  and  $^{19}\text{F}\{^1\text{H}\}$  NMR spectra of compound **1g** (in  $\text{CDCl}_3$ , rt)

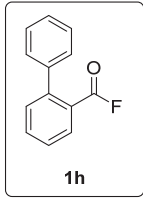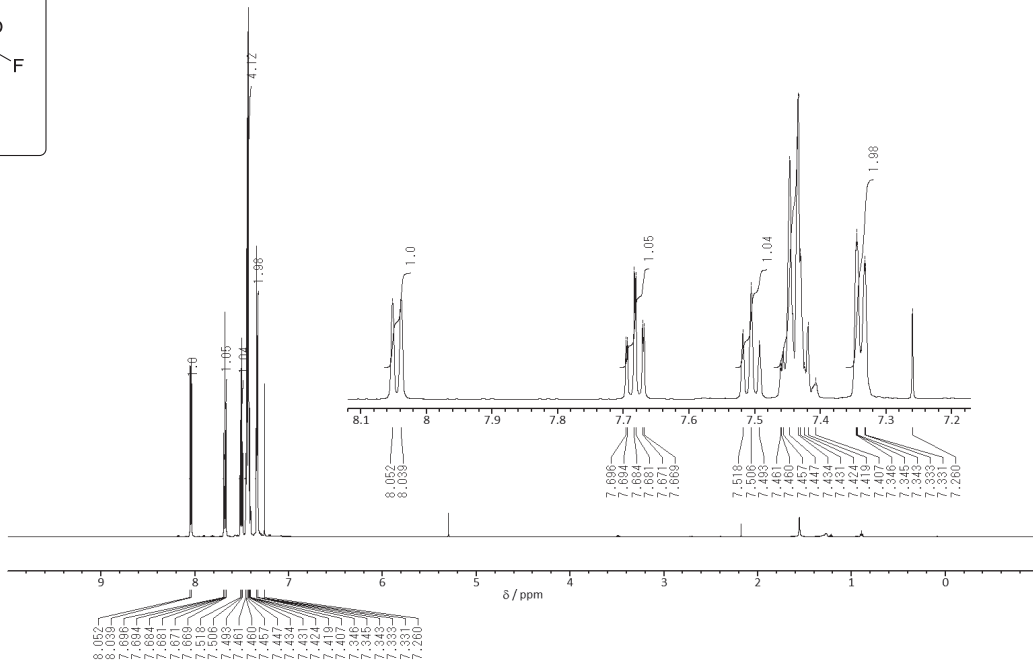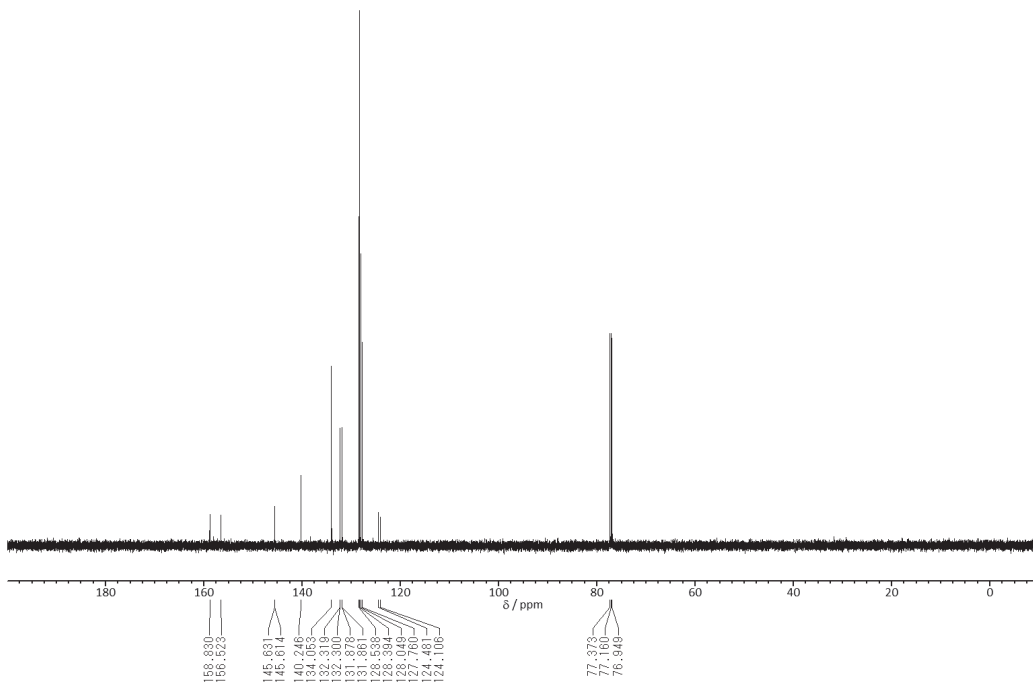

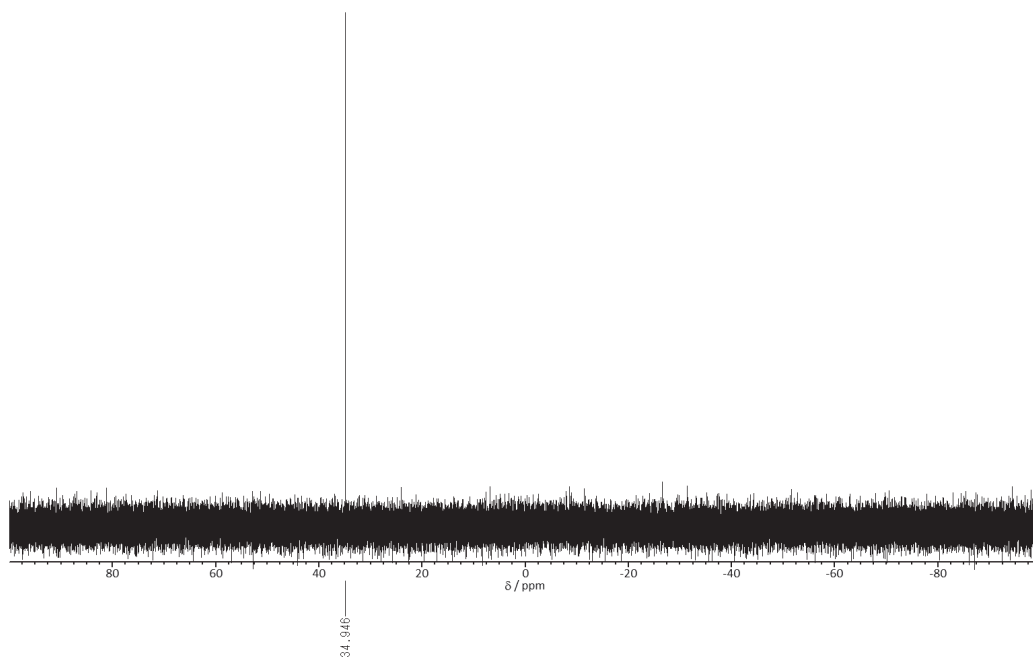

**Figure S6.**  $^1\text{H}$ ,  $^{13}\text{C}\{^1\text{H}\}$  and  $^{19}\text{F}\{^1\text{H}\}$  NMR spectra of compound **1h** (in  $\text{CDCl}_3$ , rt)



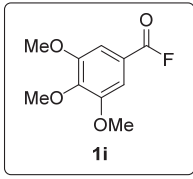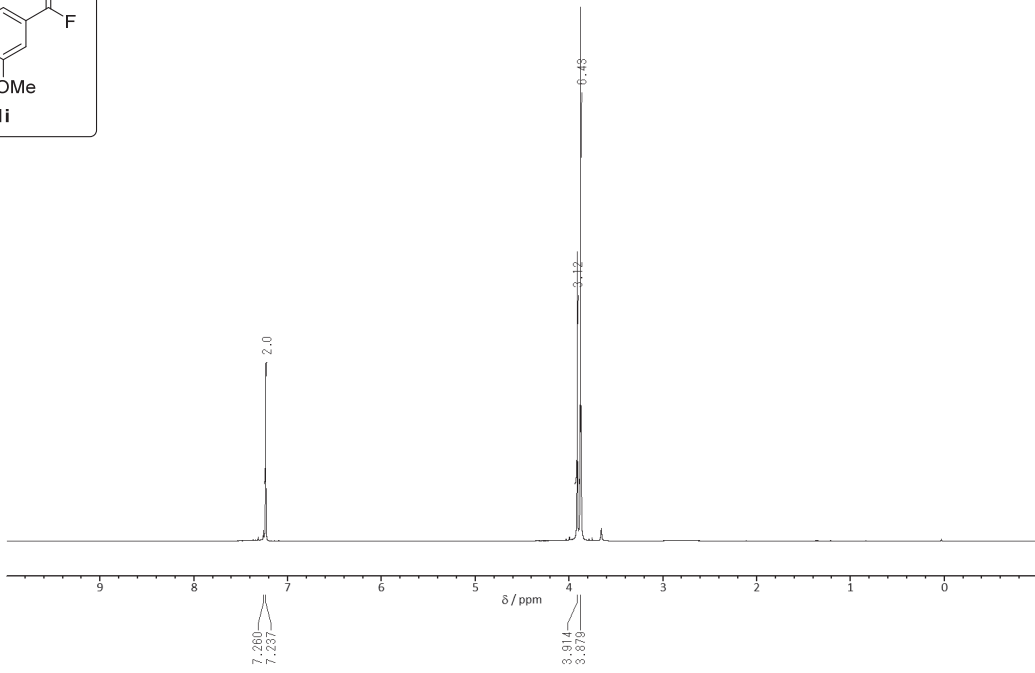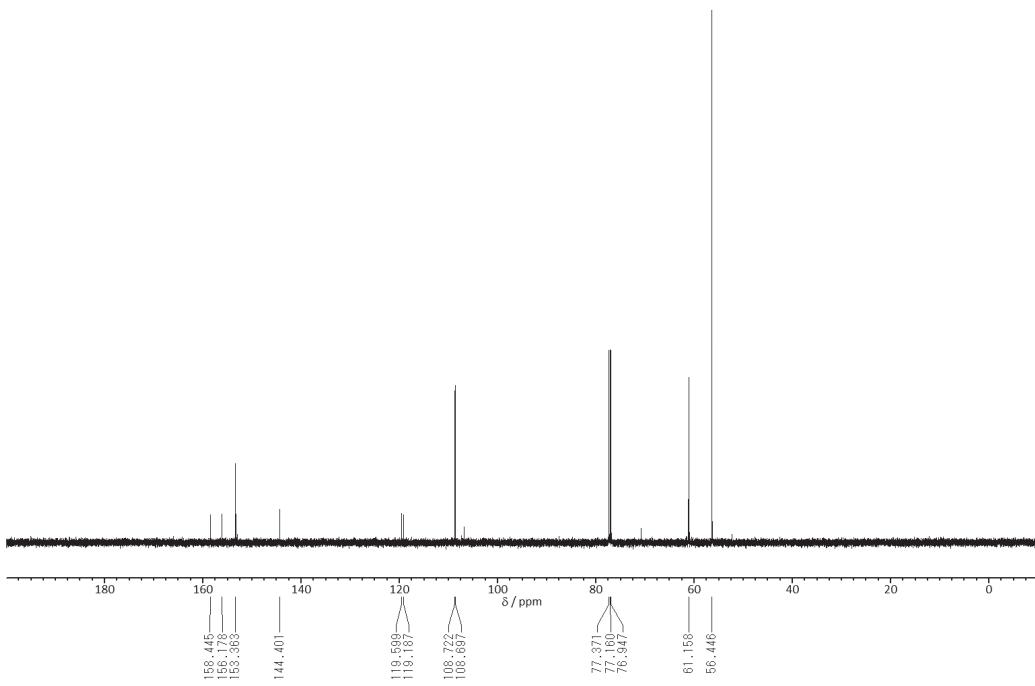

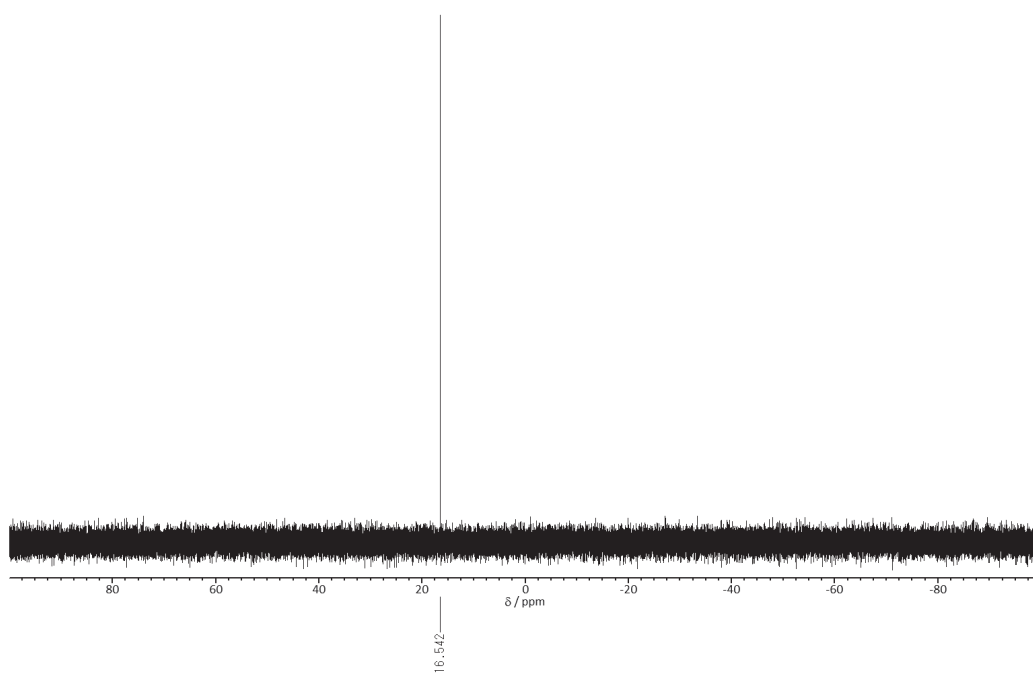

**Figure S7.**  $^1\text{H}$ ,  $^{13}\text{C}\{^1\text{H}\}$  and  $^{19}\text{F}\{^1\text{H}\}$  NMR spectra of compound **1i** (in  $\text{CDCl}_3$ , rt)

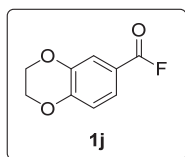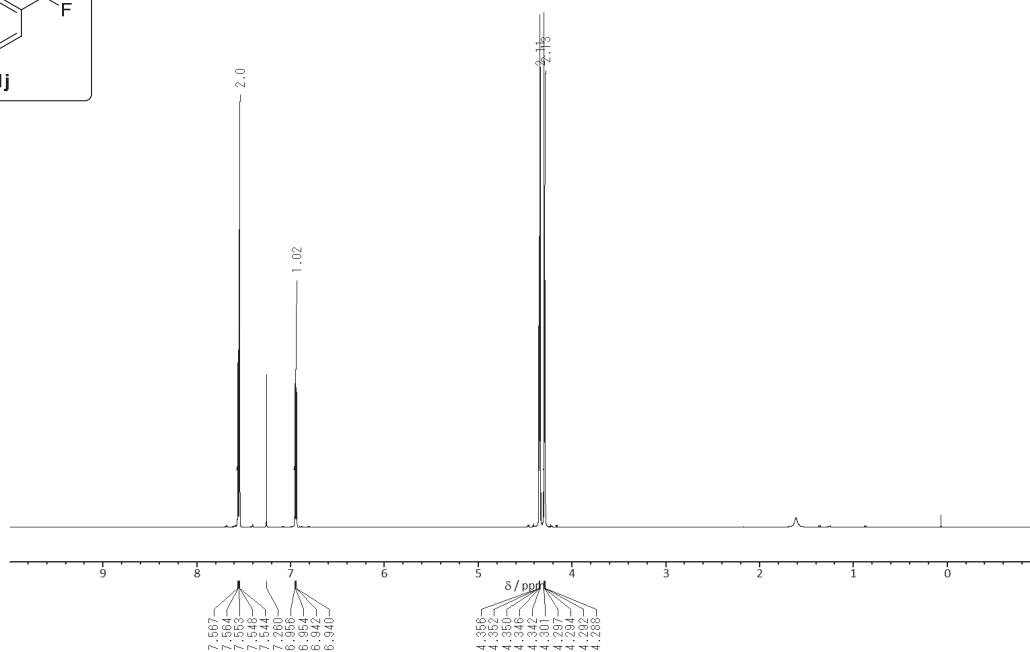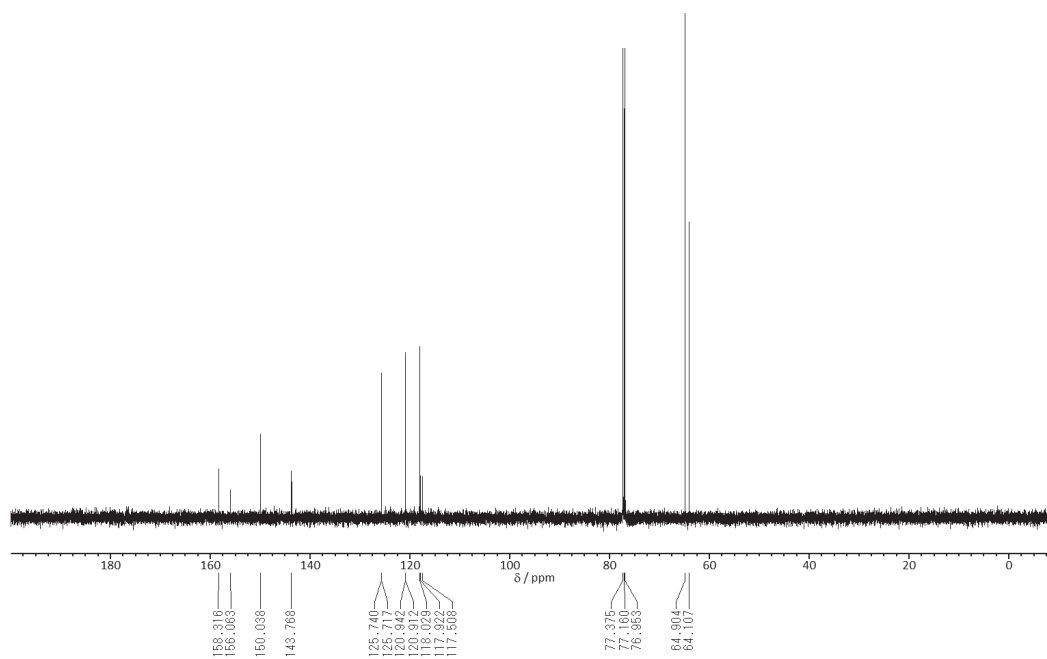

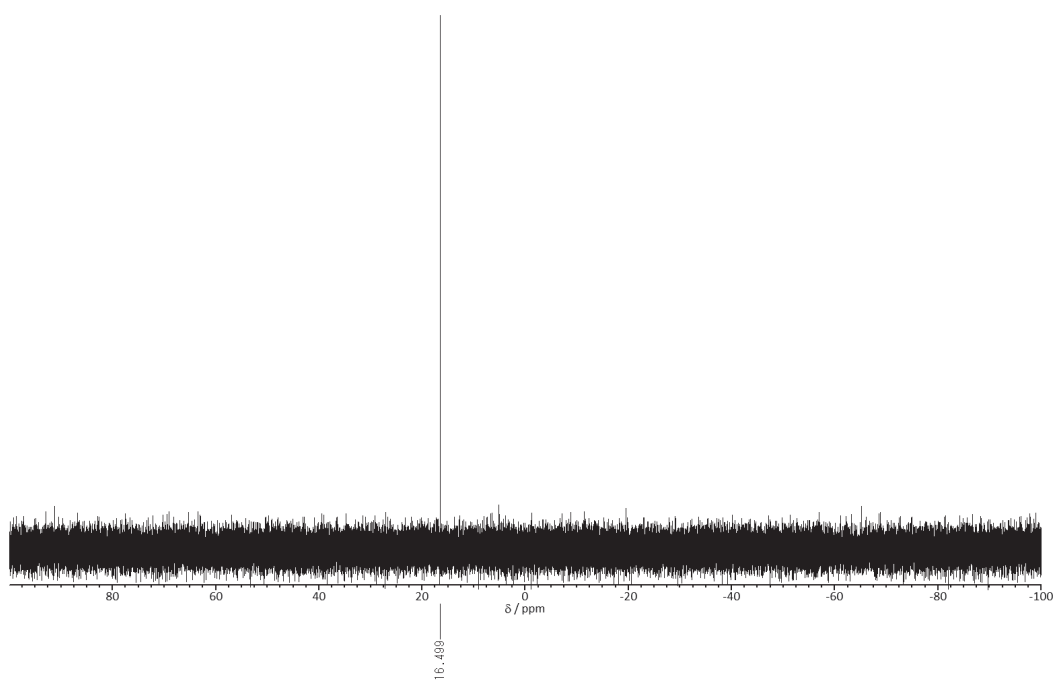

**Figure S8.**  $^1\text{H}$ ,  $^{13}\text{C}\{^1\text{H}\}$  and  $^{19}\text{F}\{^1\text{H}\}$  NMR spectra of compound **1j** (in  $\text{CDCl}_3$ , rt)

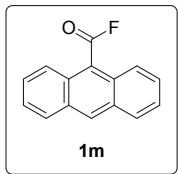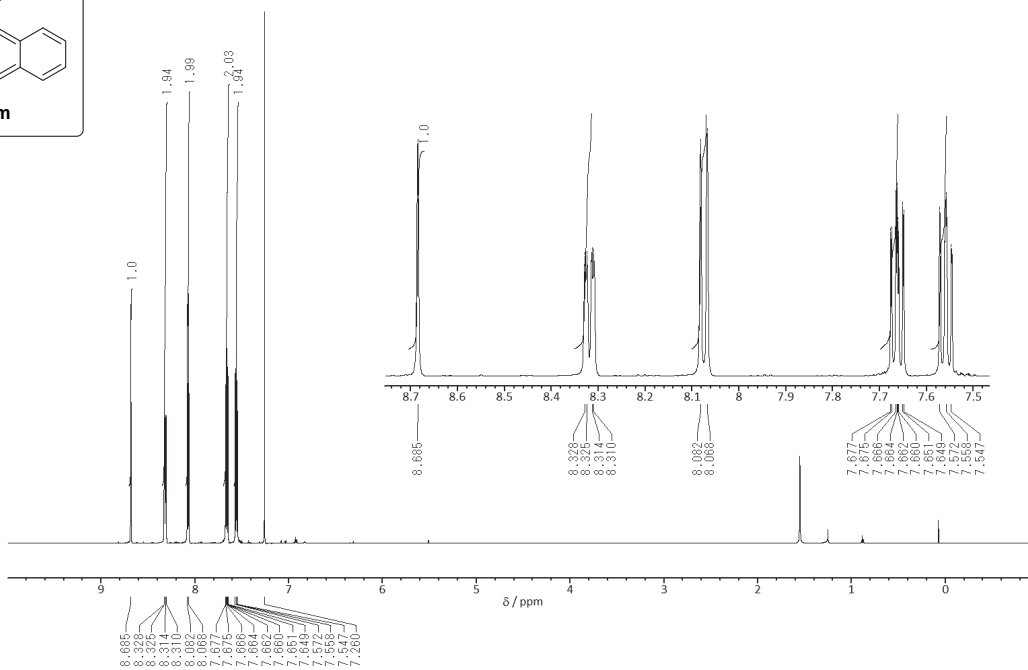

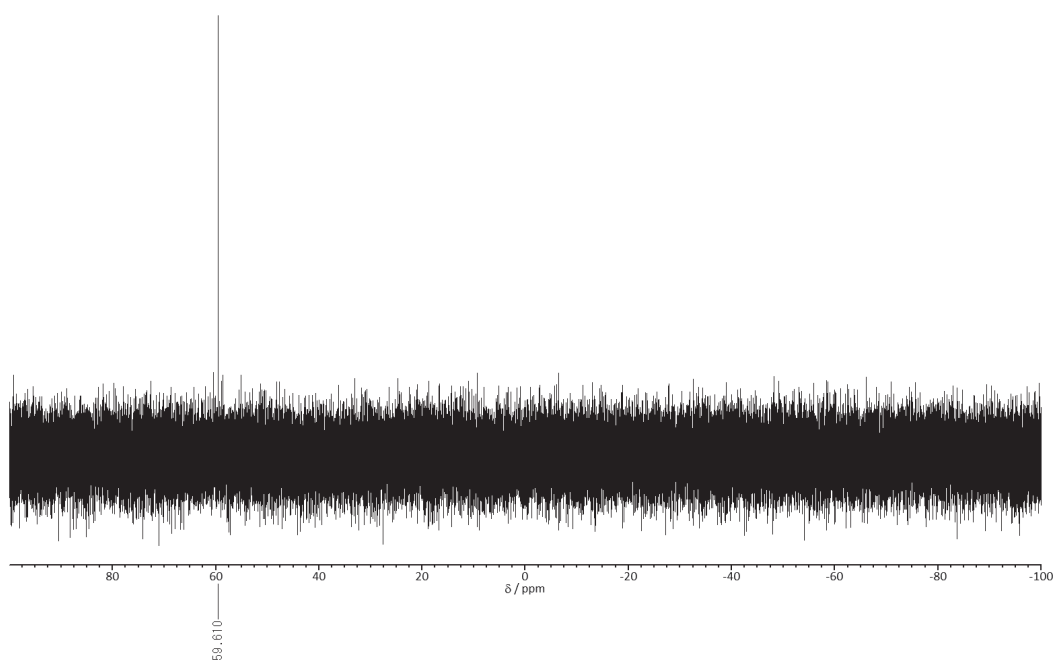

**Figure S9.**  $^1\text{H}$ ,  $^{13}\text{C}\{^1\text{H}\}$  and  $^{19}\text{F}\{^1\text{H}\}$  NMR spectra of compound **1m** (in  $\text{CDCl}_3$ , rt)

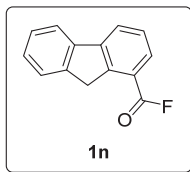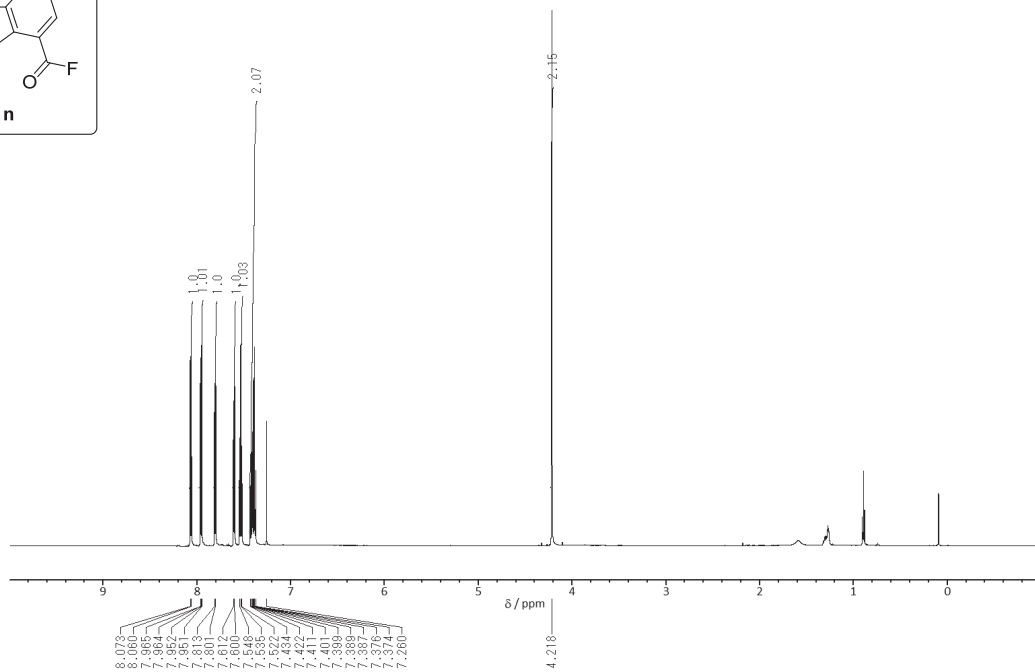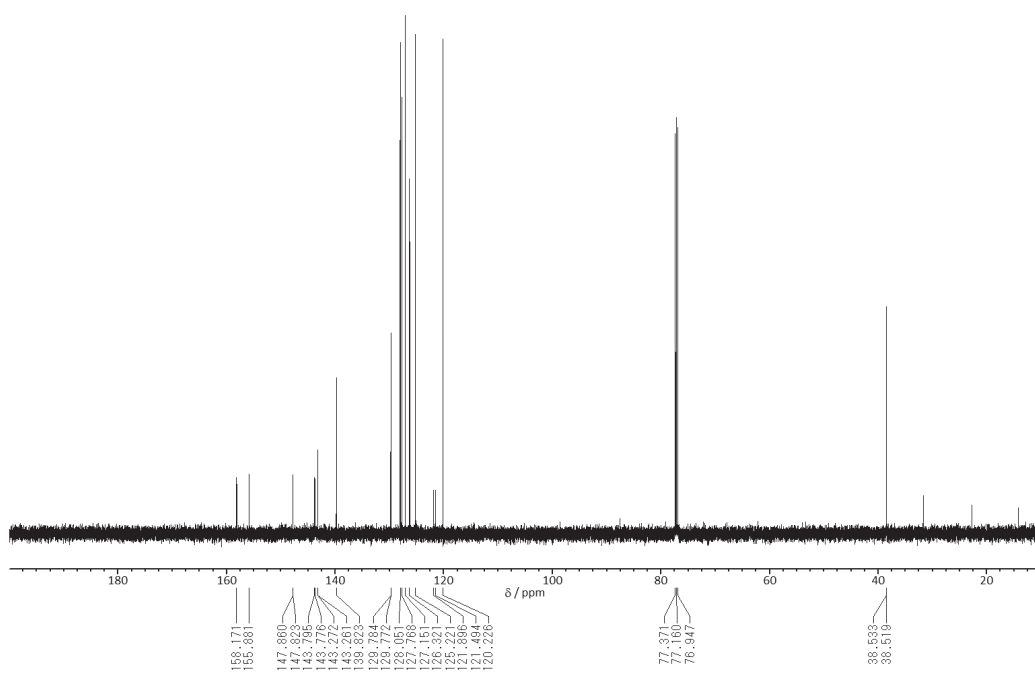

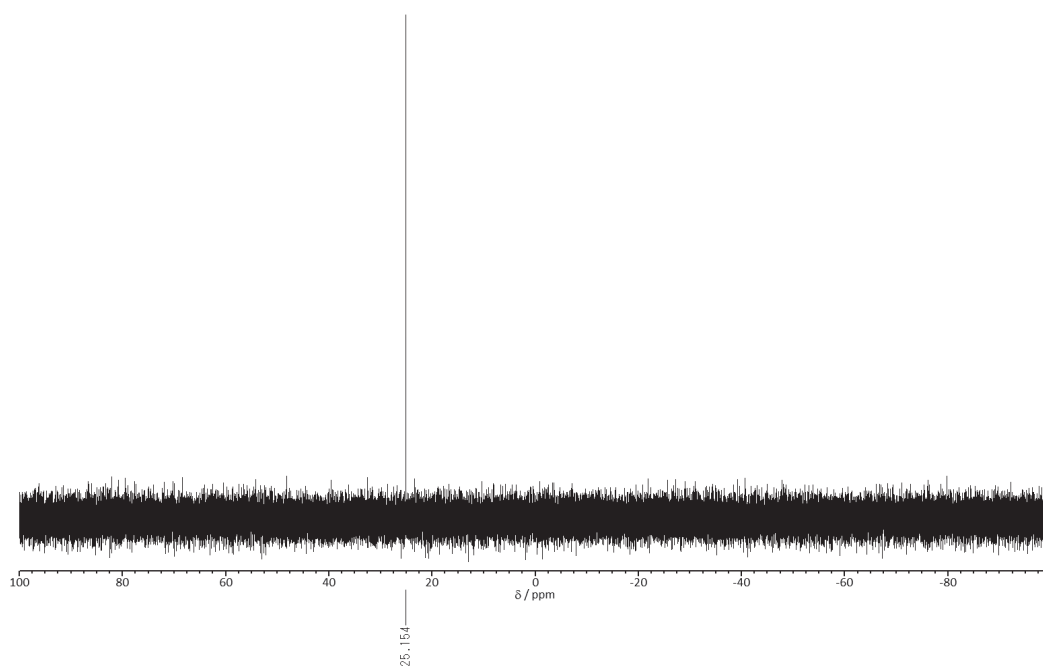

**Figure S10.**  $^1\text{H}$ ,  $^{13}\text{C}\{^1\text{H}\}$  and  $^{19}\text{F}\{^1\text{H}\}$  NMR spectra of compound **1n** (in  $\text{CDCl}_3$ , rt)





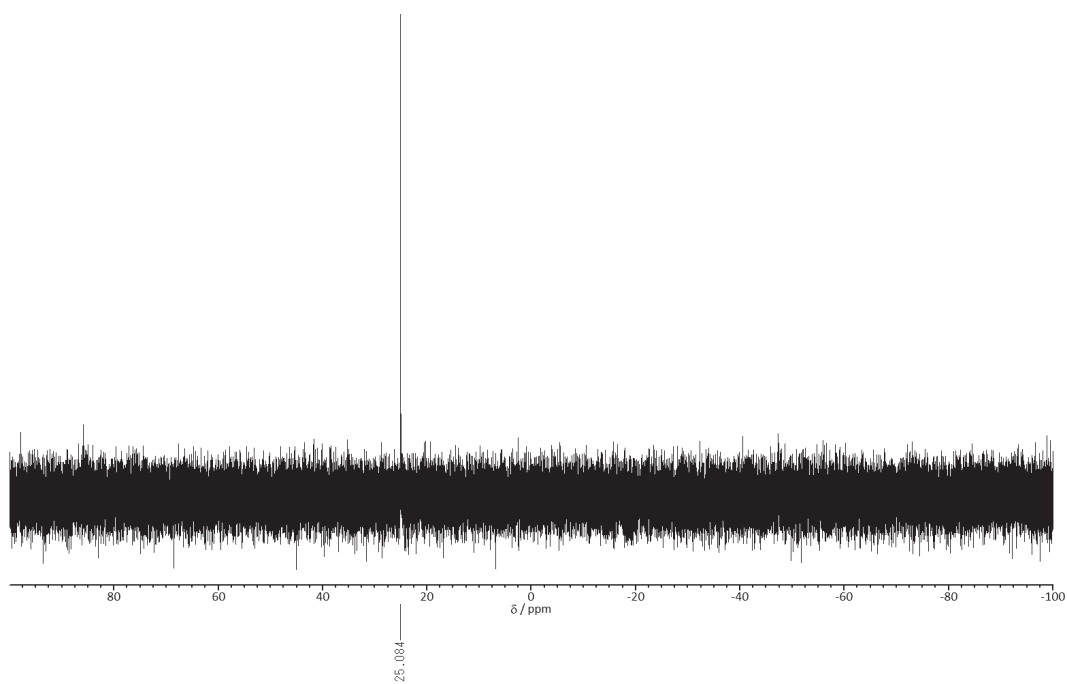

**Figure S11.**  $^1\text{H}$ ,  $^{13}\text{C}\{^1\text{H}\}$  and  $^{19}\text{F}\{^1\text{H}\}$  NMR spectra of compound **1p** (in  $\text{CDCl}_3$ )

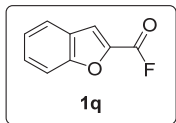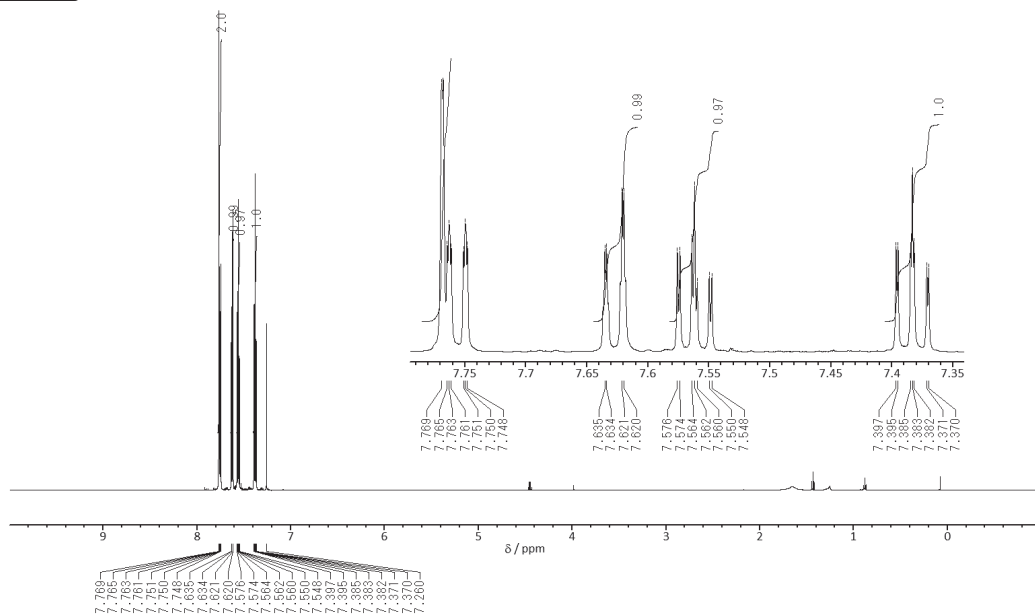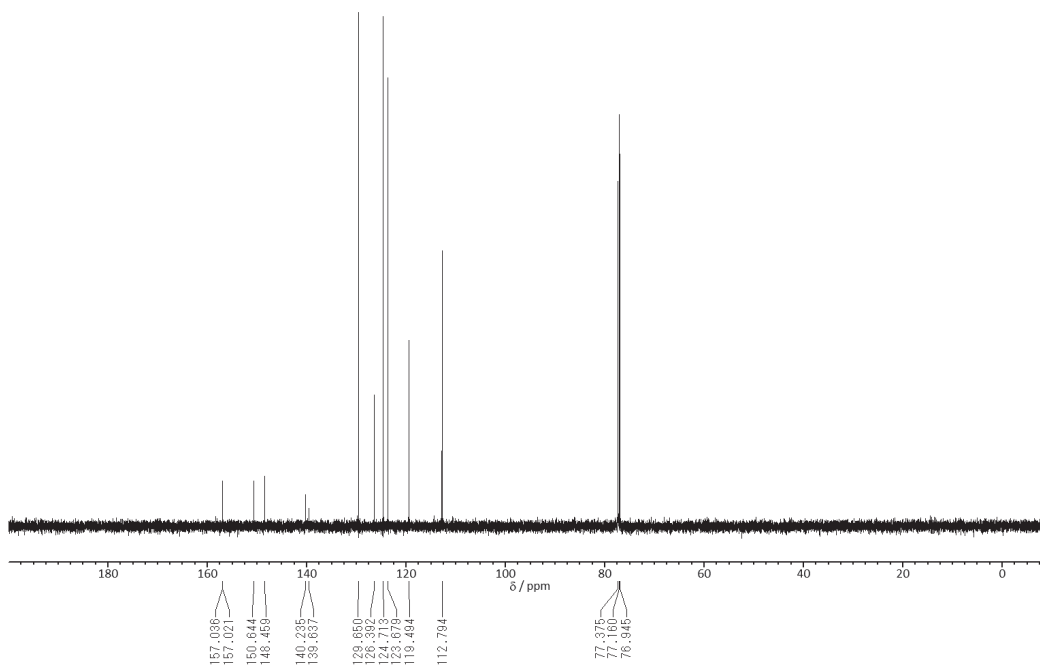

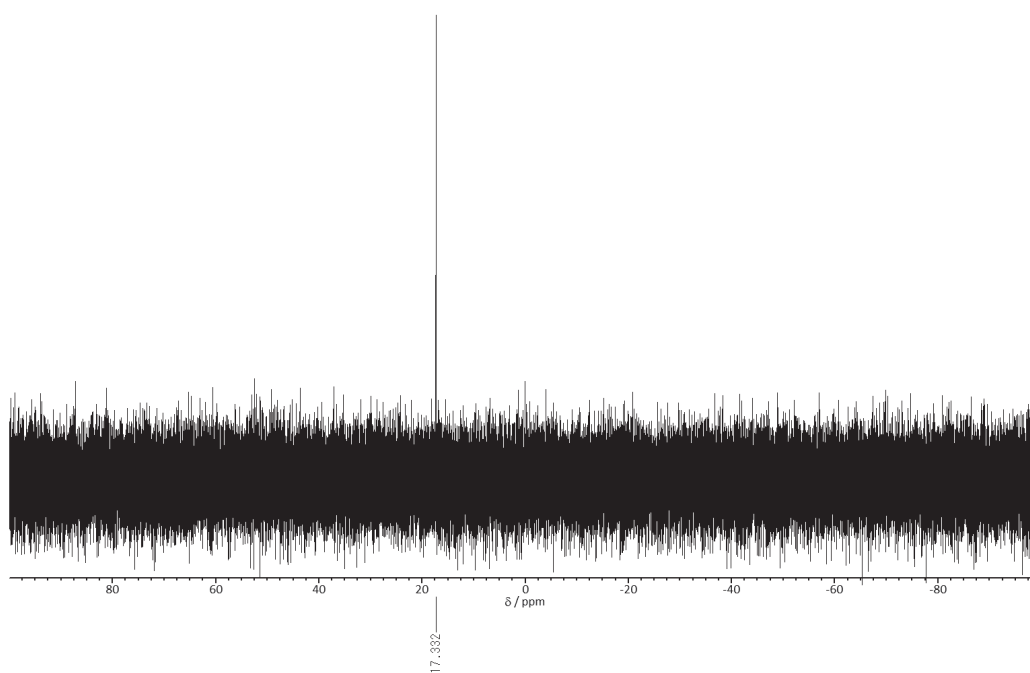

**Figure S12.**  $^1\text{H}$ ,  $^{13}\text{C}\{^1\text{H}\}$  and  $^{19}\text{F}\{^1\text{H}\}$  NMR spectra of compound **1q** (in  $\text{CDCl}_3$ )



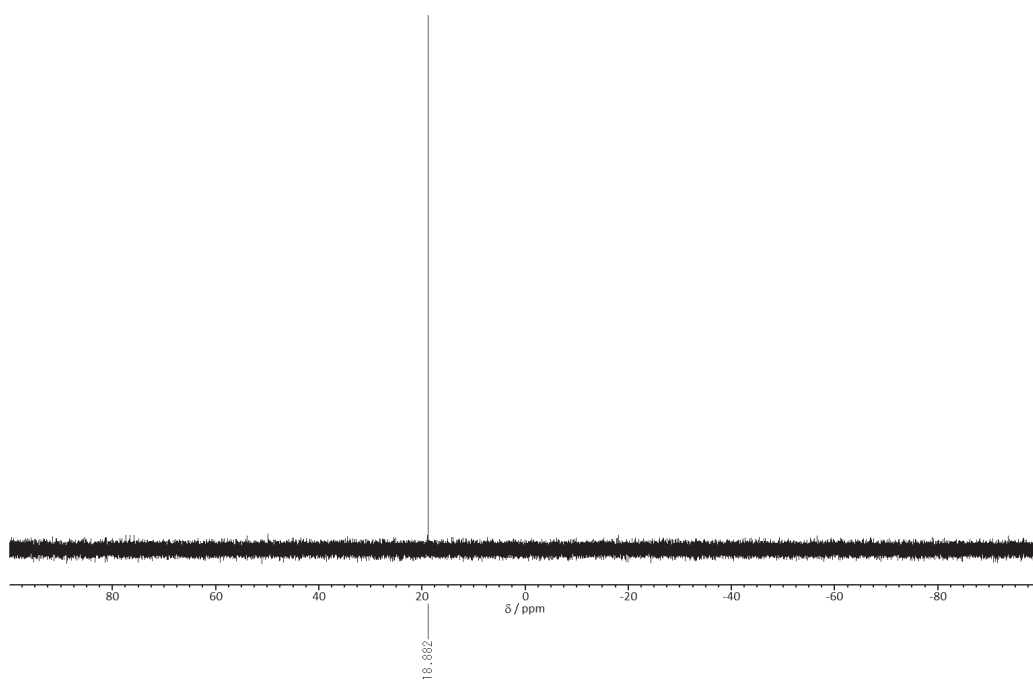

**Figure S13.**  $^1\text{H}$ ,  $^{13}\text{C}\{^1\text{H}\}$  and  $^{19}\text{F}\{^1\text{H}\}$  NMR spectra of compound **1r** (in  $\text{CDCl}_3$ )

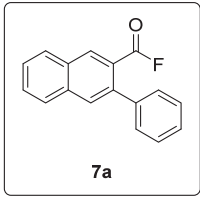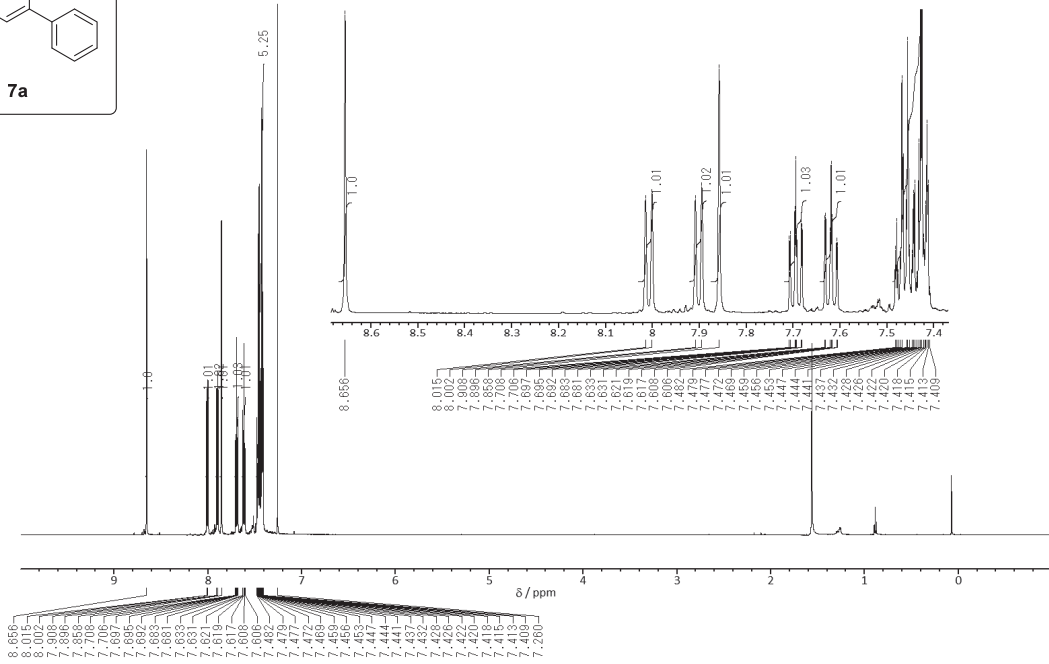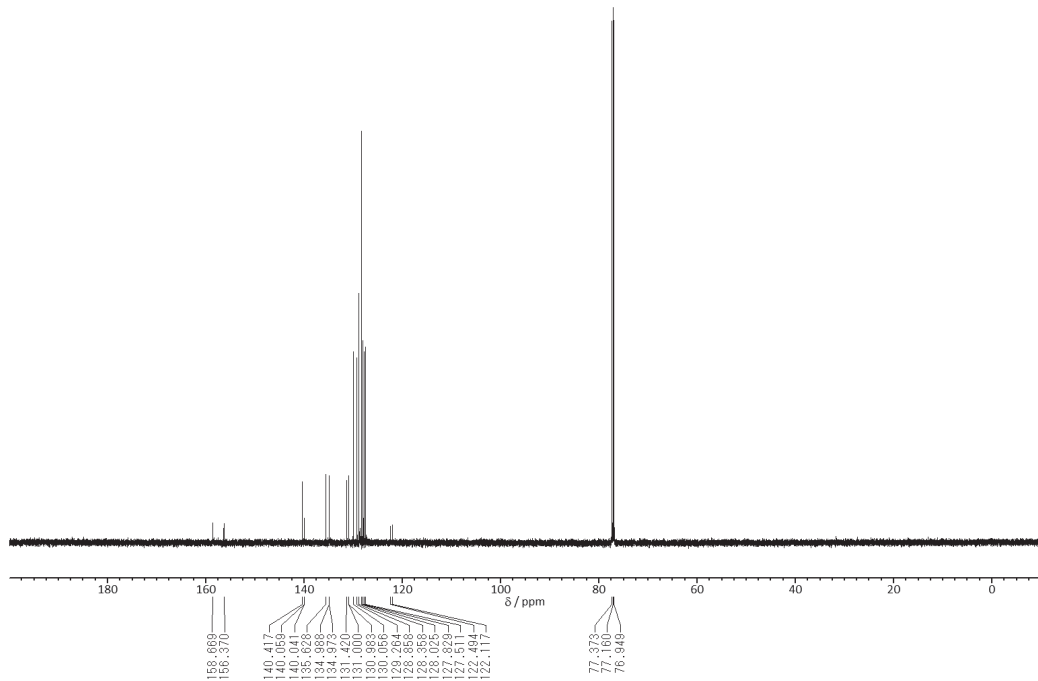

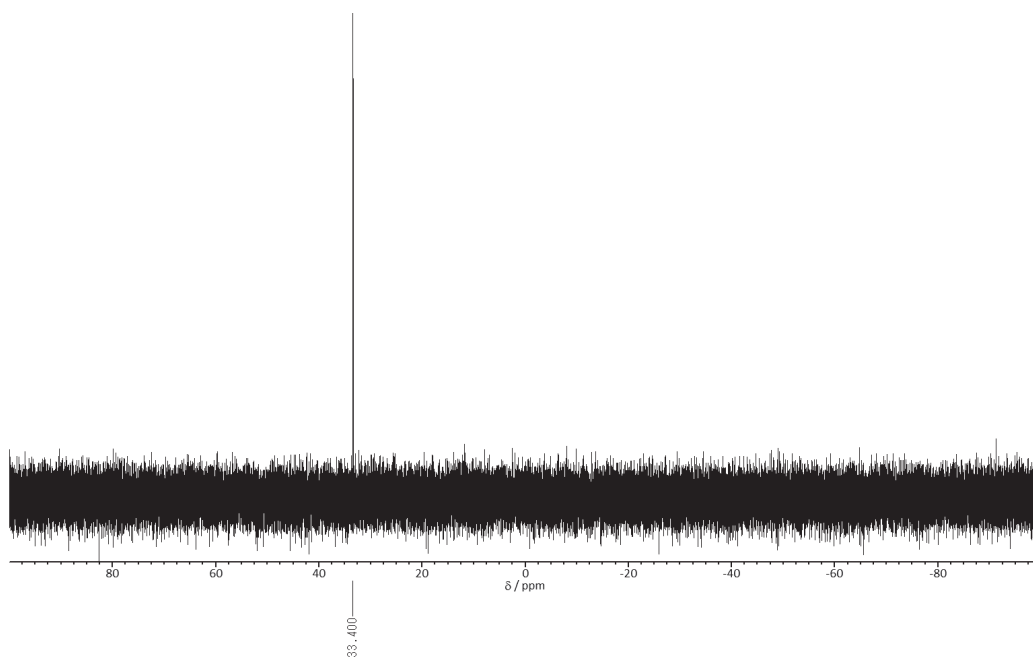

**Figure S14.**  $^1\text{H}$ ,  $^{13}\text{C}\{^1\text{H}\}$  and  $^{19}\text{F}\{^1\text{H}\}$  NMR spectra of compound **7a** (in  $\text{CDCl}_3$ )



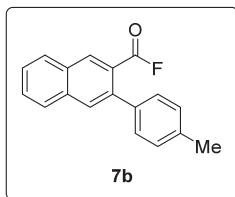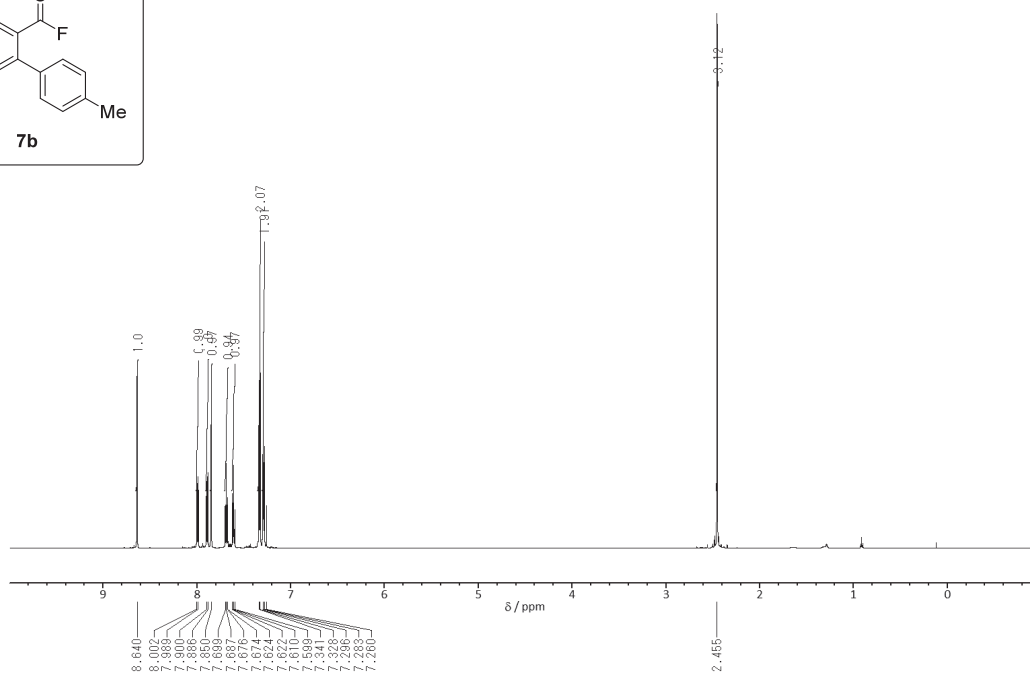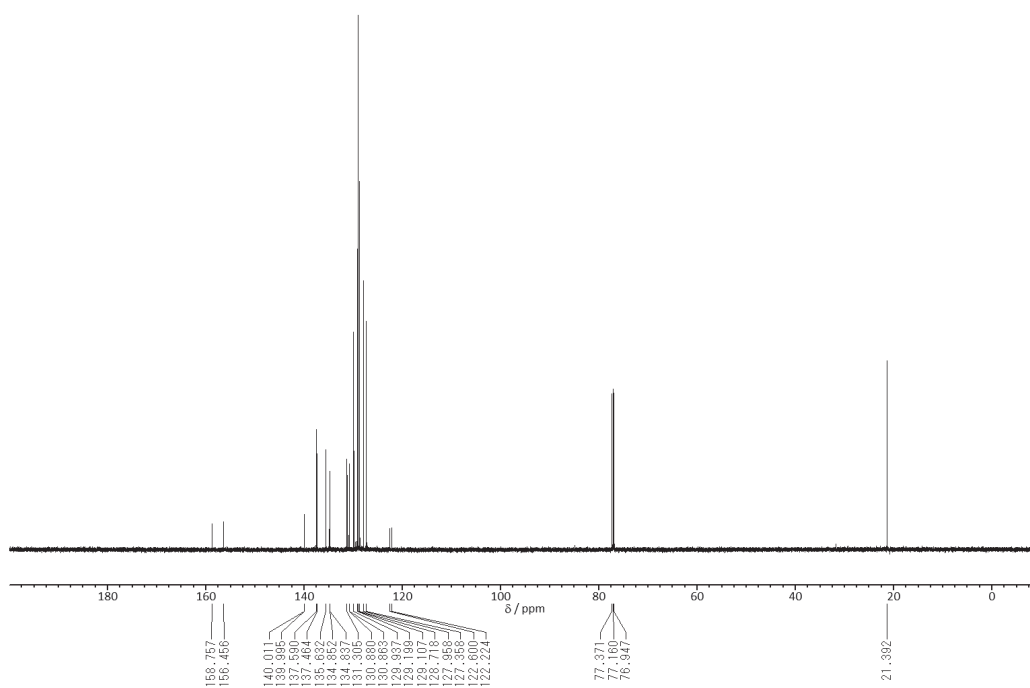

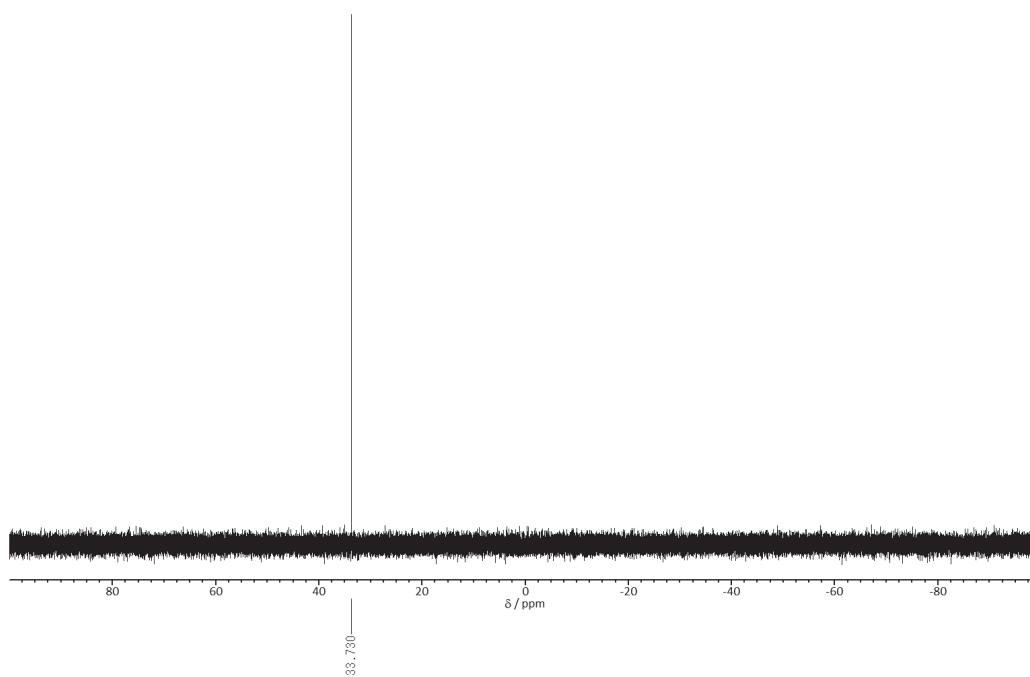

**Figure S15.**  $^1\text{H}$ ,  $^{13}\text{C}\{^1\text{H}\}$  and  $^{19}\text{F}\{^1\text{H}\}$  NMR spectra of compound **7b** (in  $\text{CDCl}_3$ )

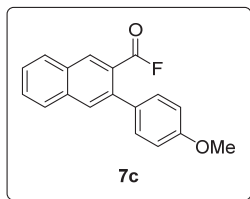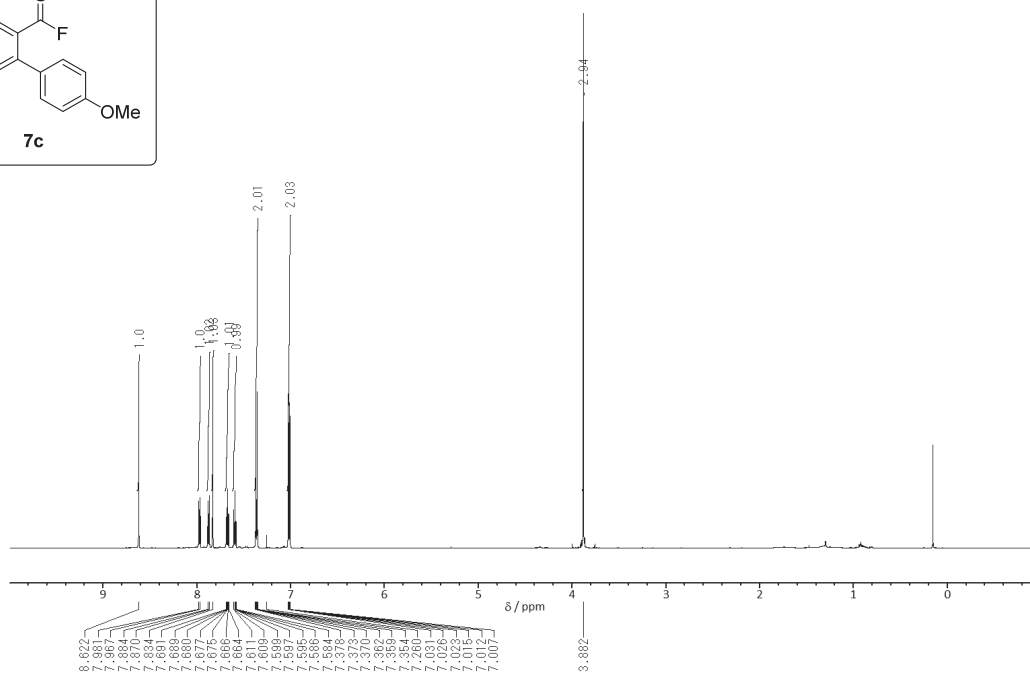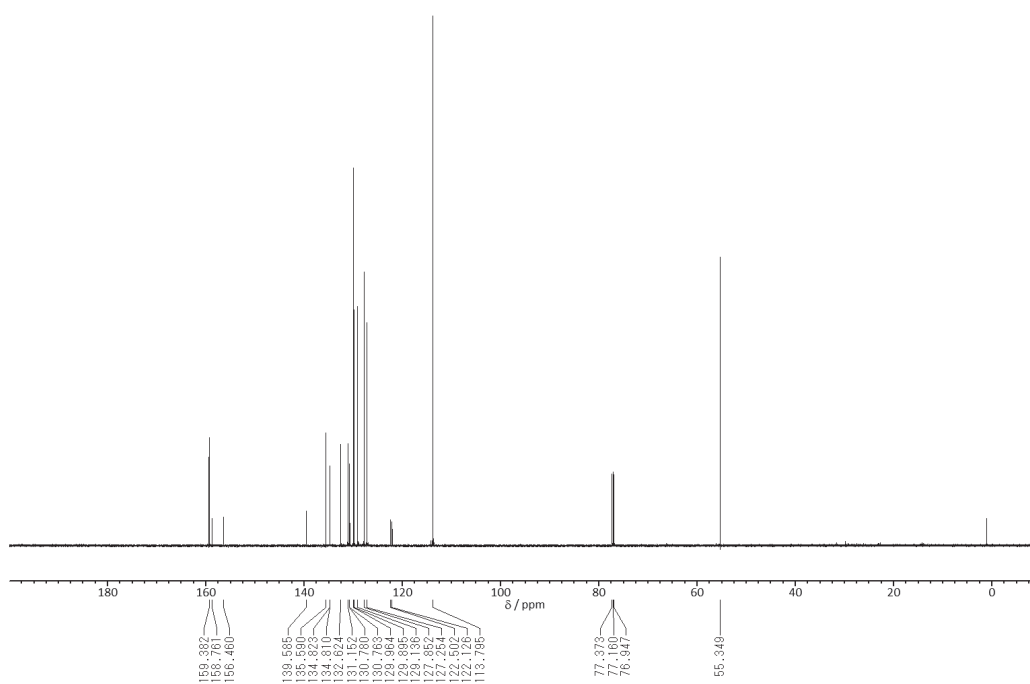

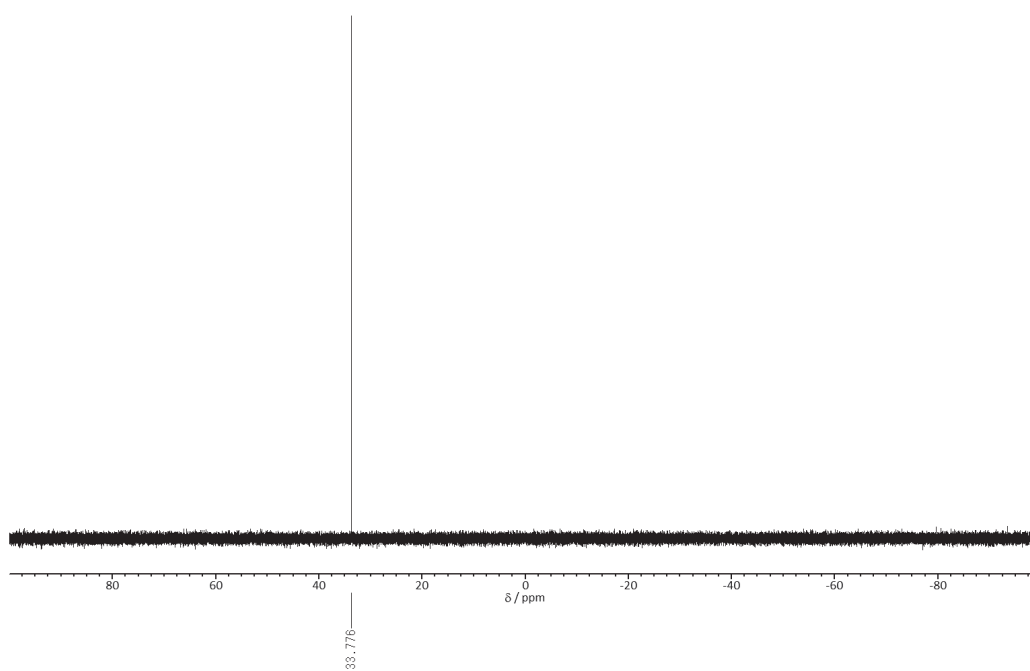

**Figure S16.**  $^1\text{H}$ ,  $^{13}\text{C}\{^1\text{H}\}$  and  $^{19}\text{F}\{^1\text{H}\}$  NMR spectra of compound **7c** (in  $\text{CDCl}_3$ )

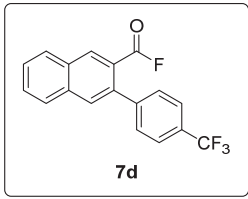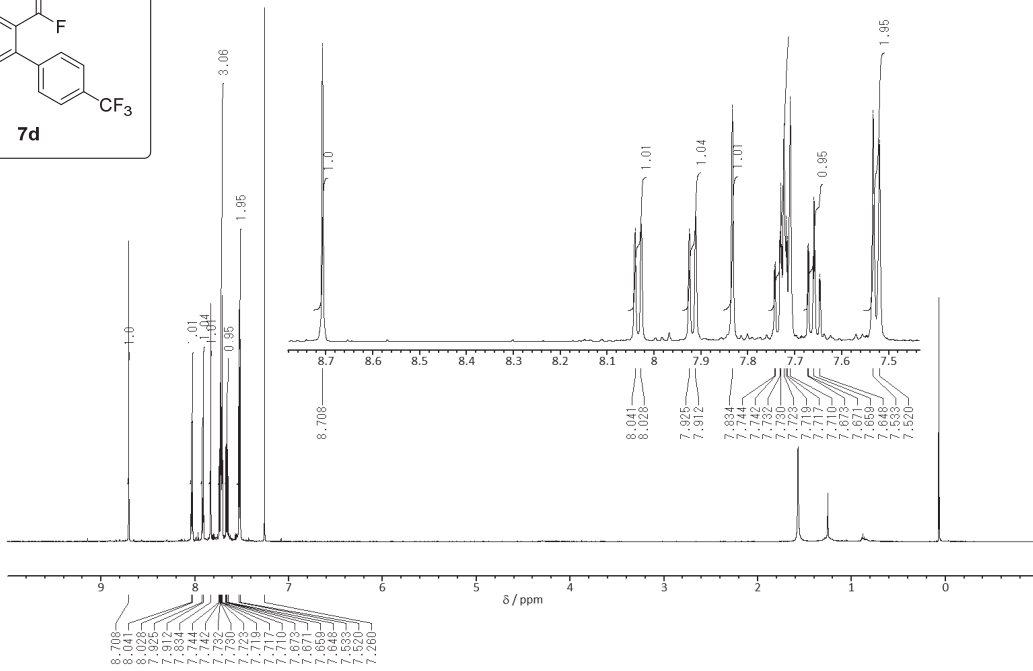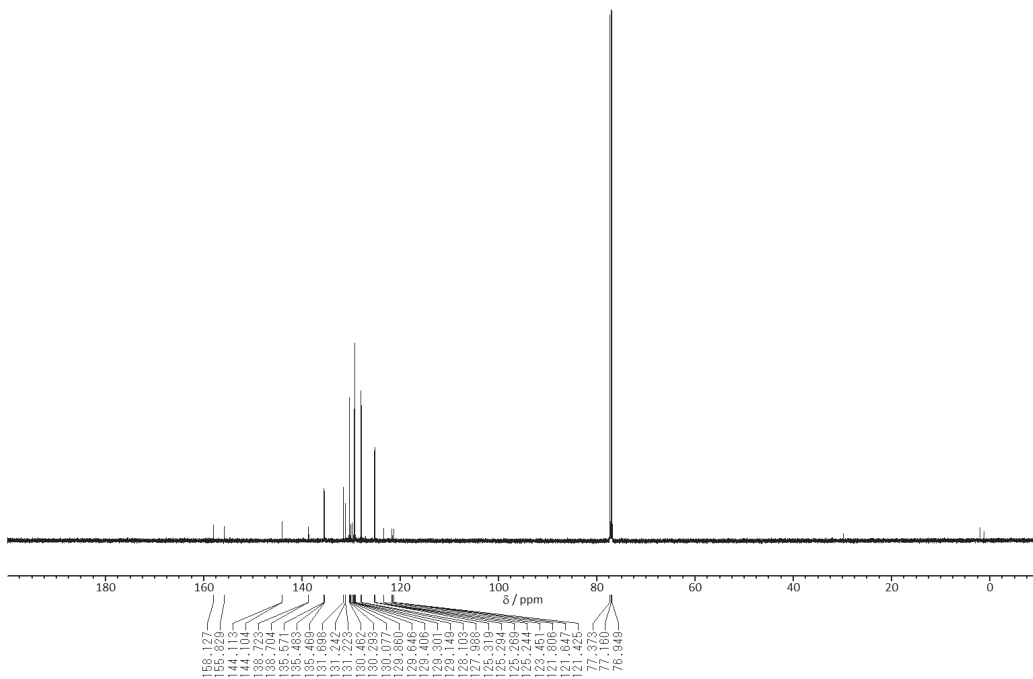

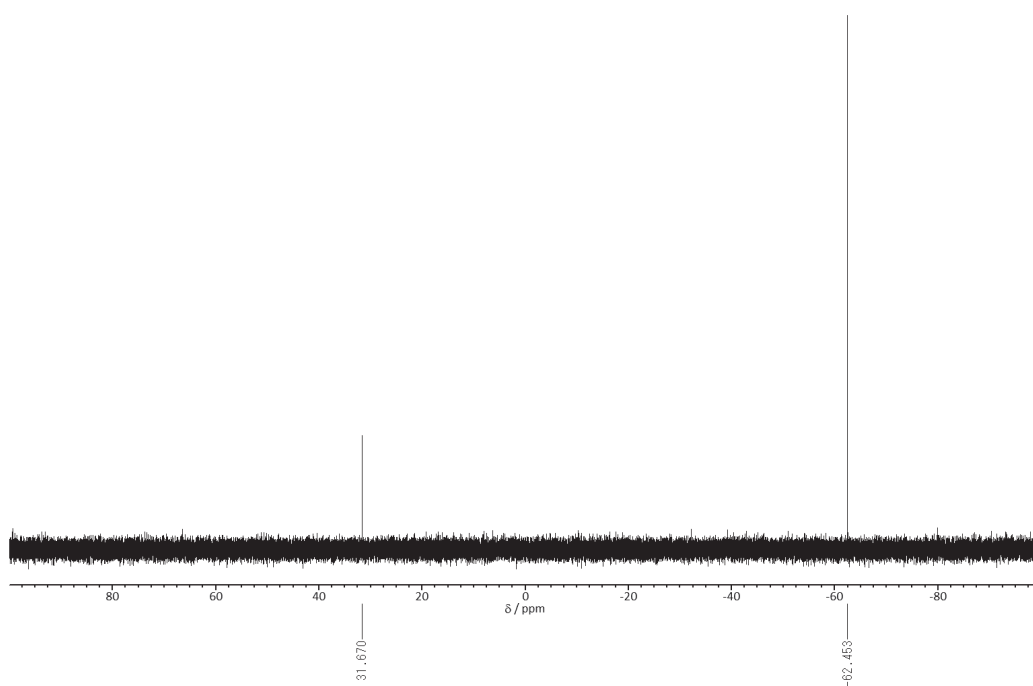

**Figure S17.**  $^1\text{H}$ ,  $^{13}\text{C}\{^1\text{H}\}$  and  $^{19}\text{F}\{^1\text{H}\}$  NMR spectra of compound **7d** (in  $\text{CDCl}_3$ )

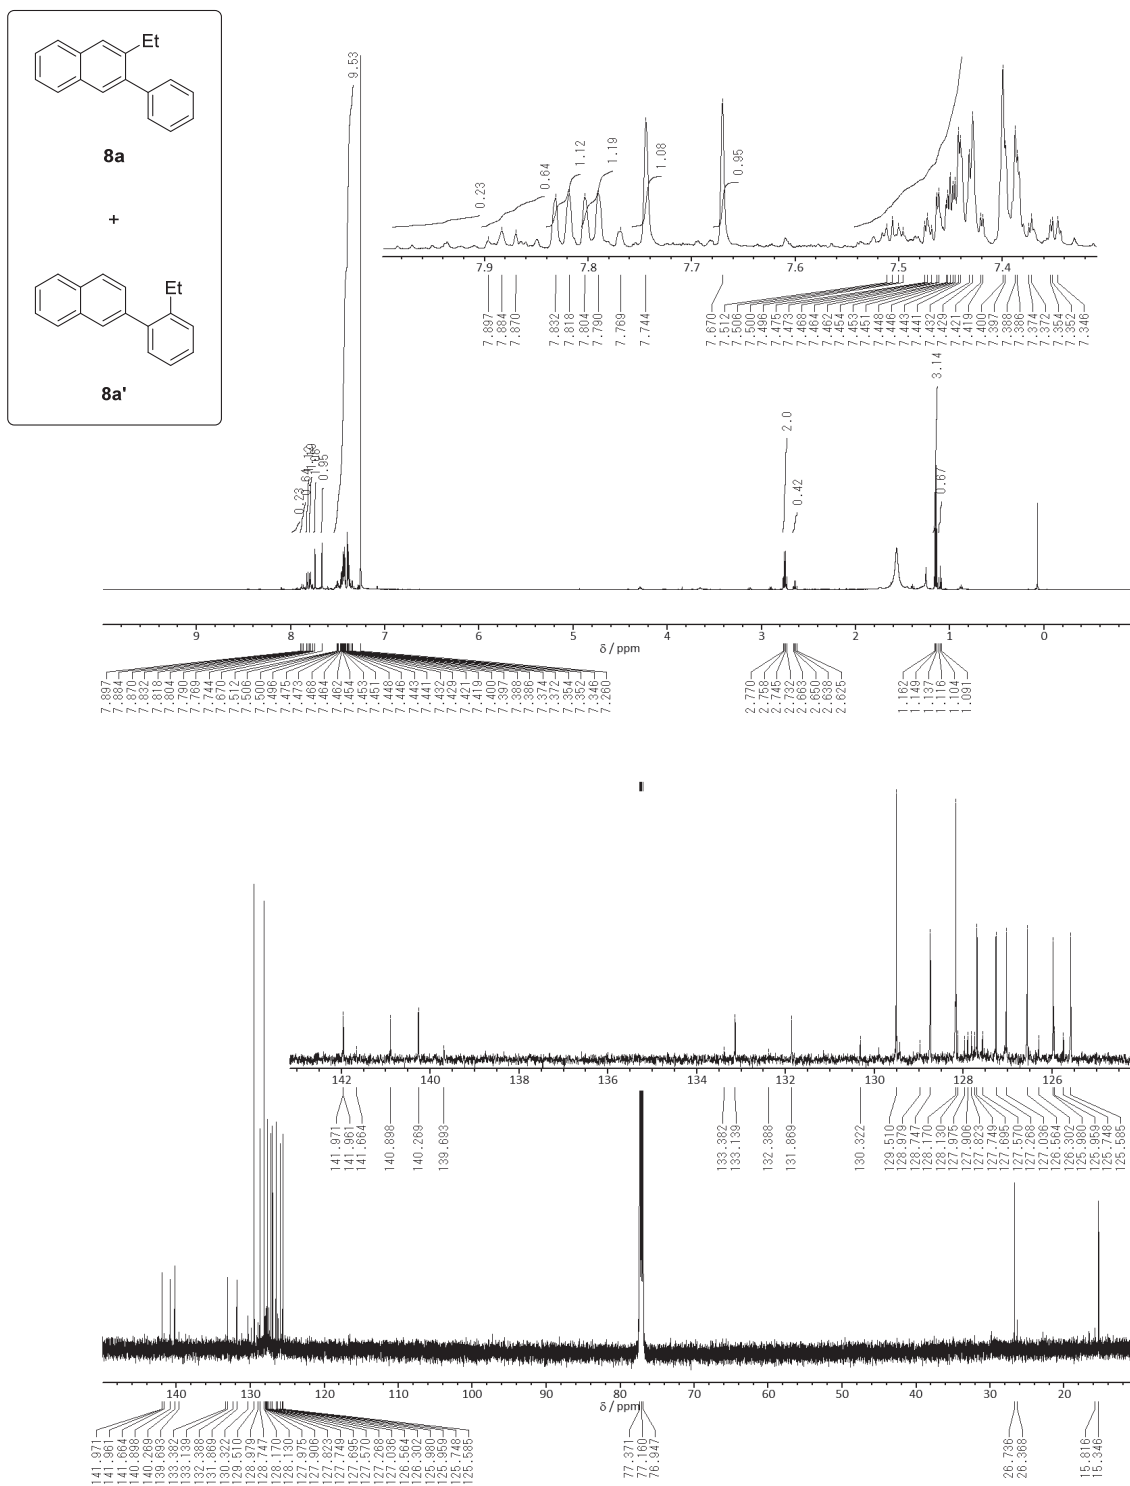

Figure S18.  $^1\text{H}$  and  $^{13}\text{C}\{^1\text{H}\}$  NMR spectra of mixture of **8a** and **8a'** (in  $\text{CDCl}_3$ )

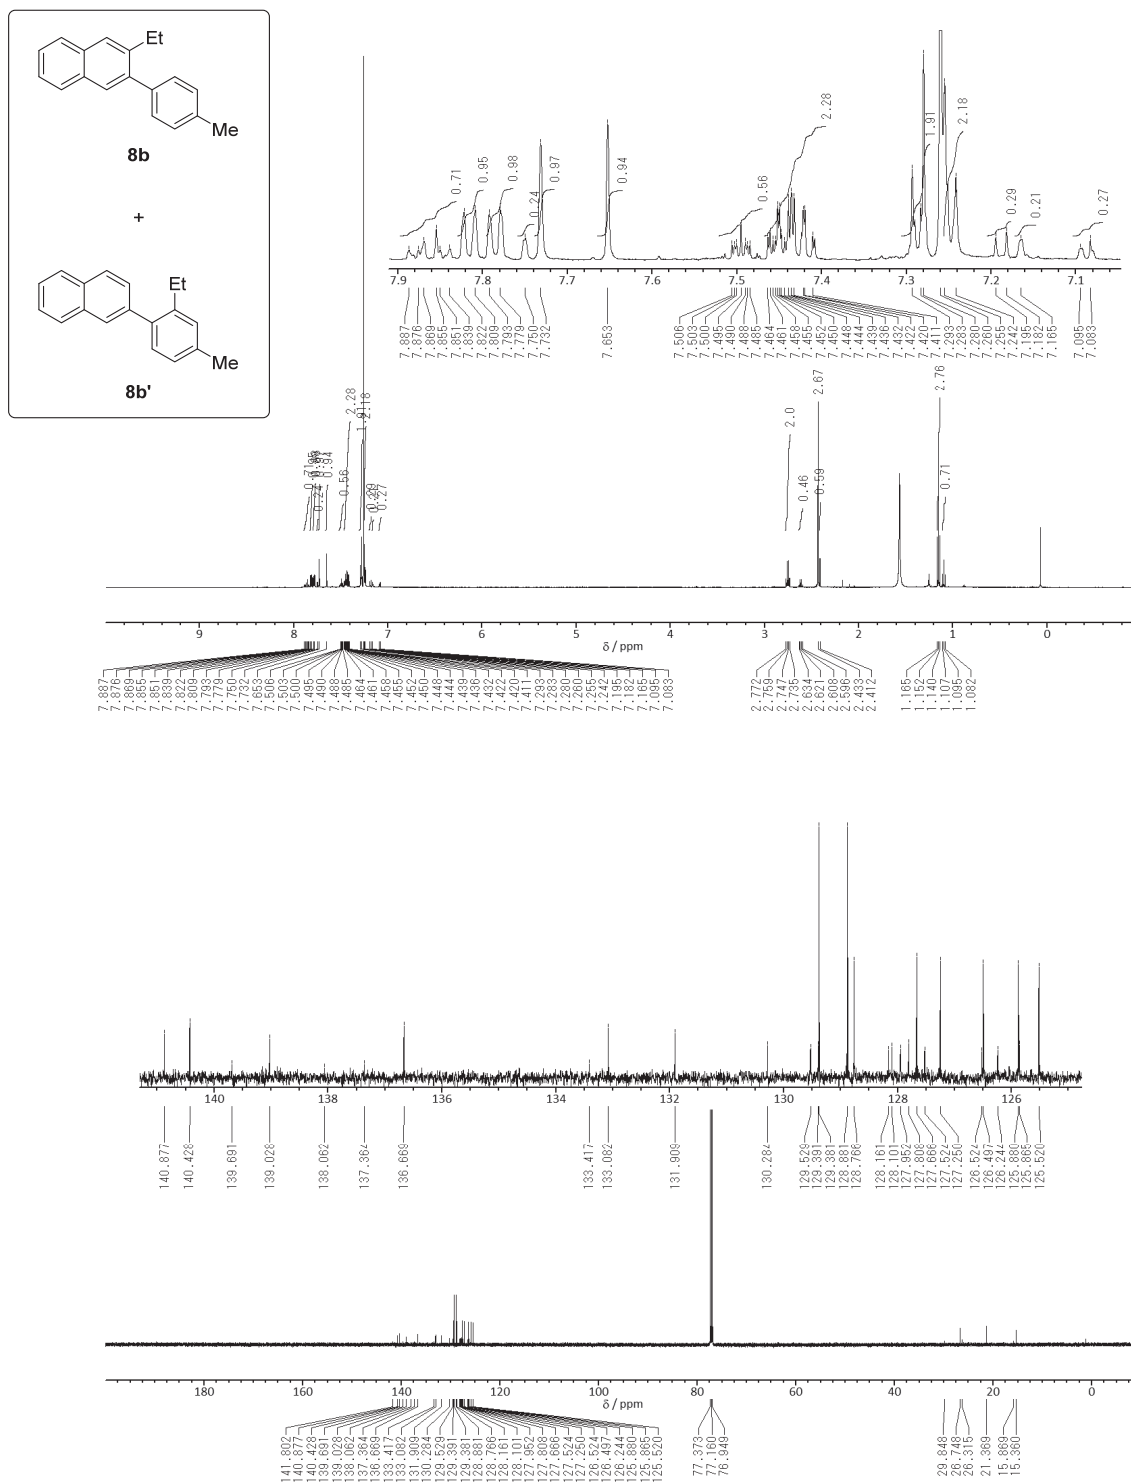

Figure S19. <sup>1</sup>H and <sup>13</sup>C{<sup>1</sup>H} NMR spectra of mixture of **8b** and **8b'** (in CDCl<sub>3</sub>)





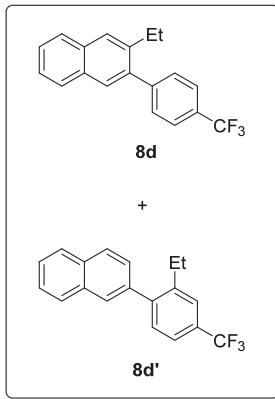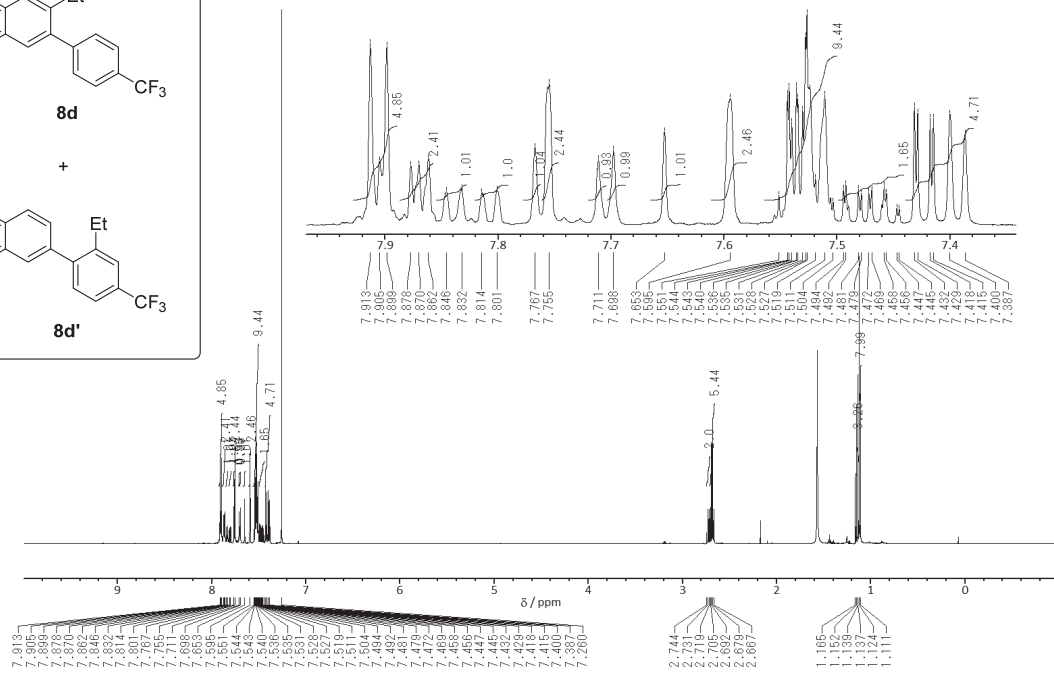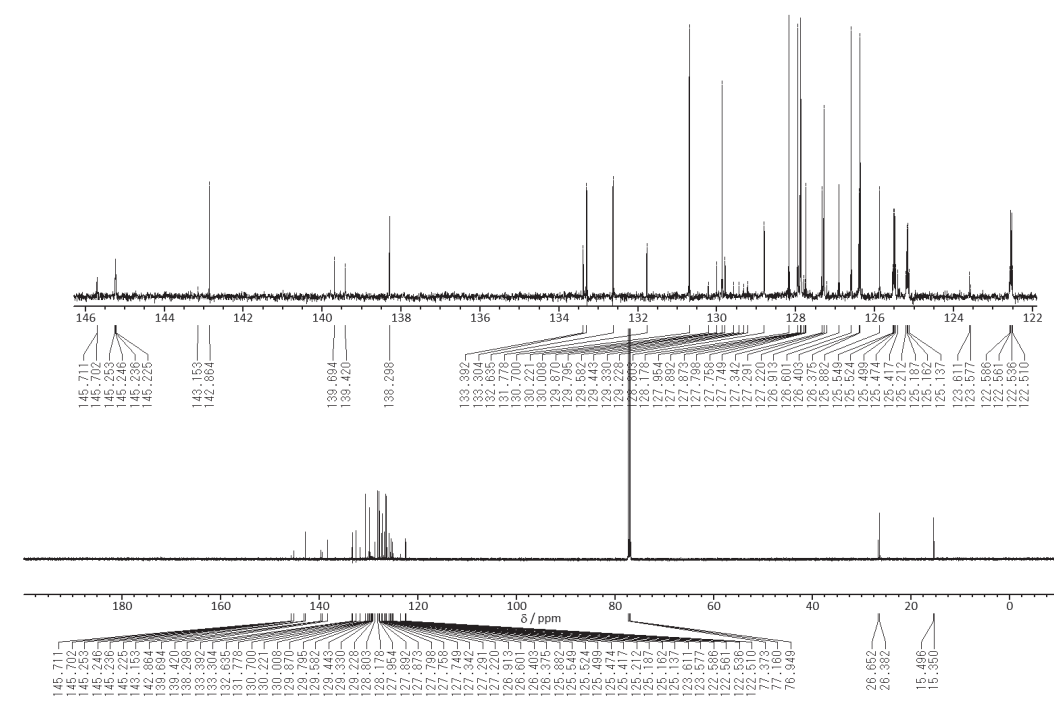

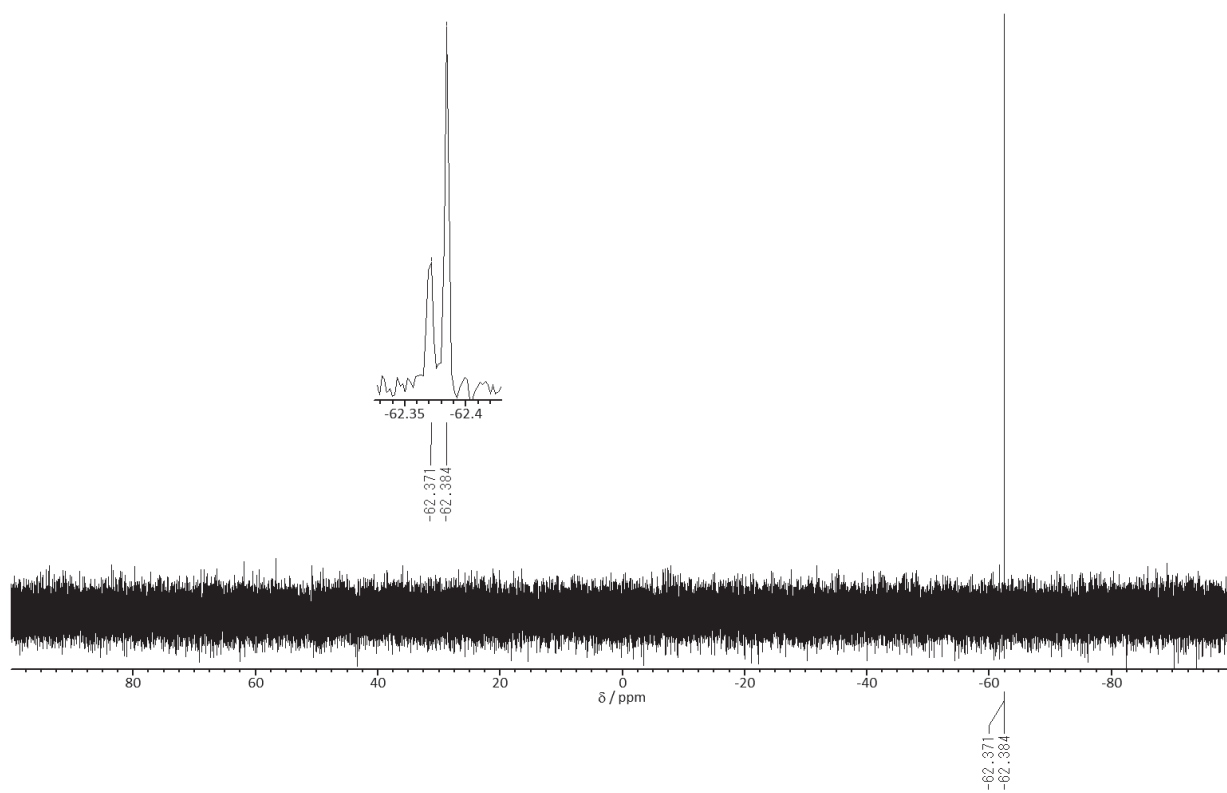

**Figure S21.**  $^1\text{H}$ ,  $^{13}\text{C}\{^1\text{H}\}$  and  $^{19}\text{F}\{^1\text{H}\}$  NMR spectra of mixture of **8d** and **8d'** (in  $\text{CDCl}_3$ )

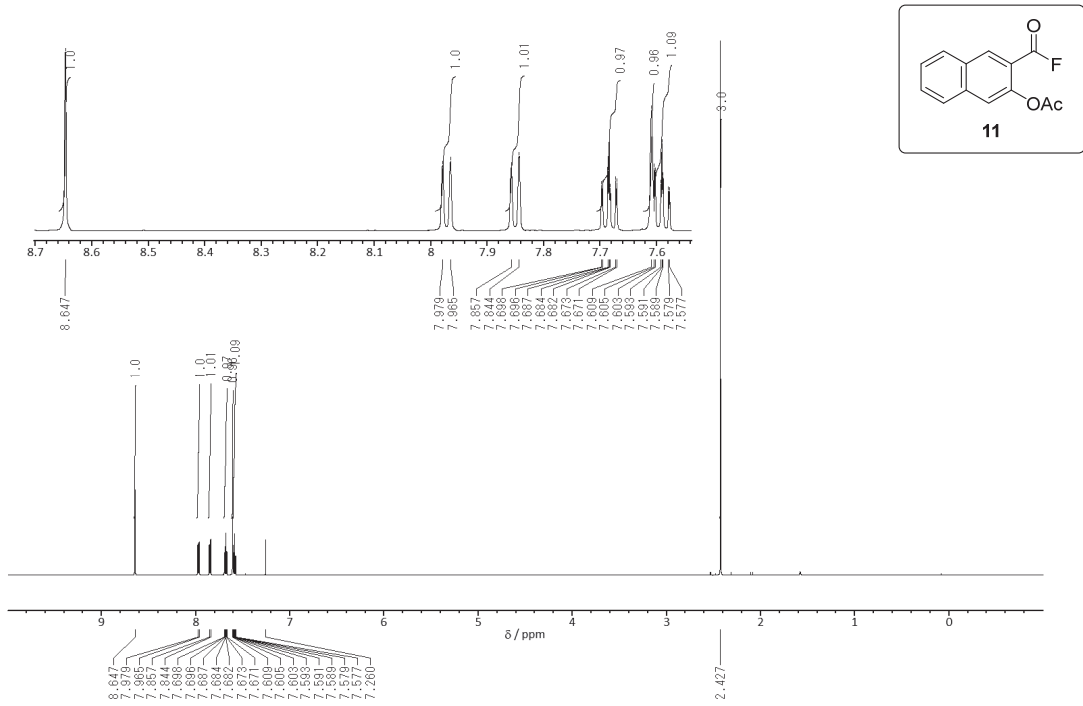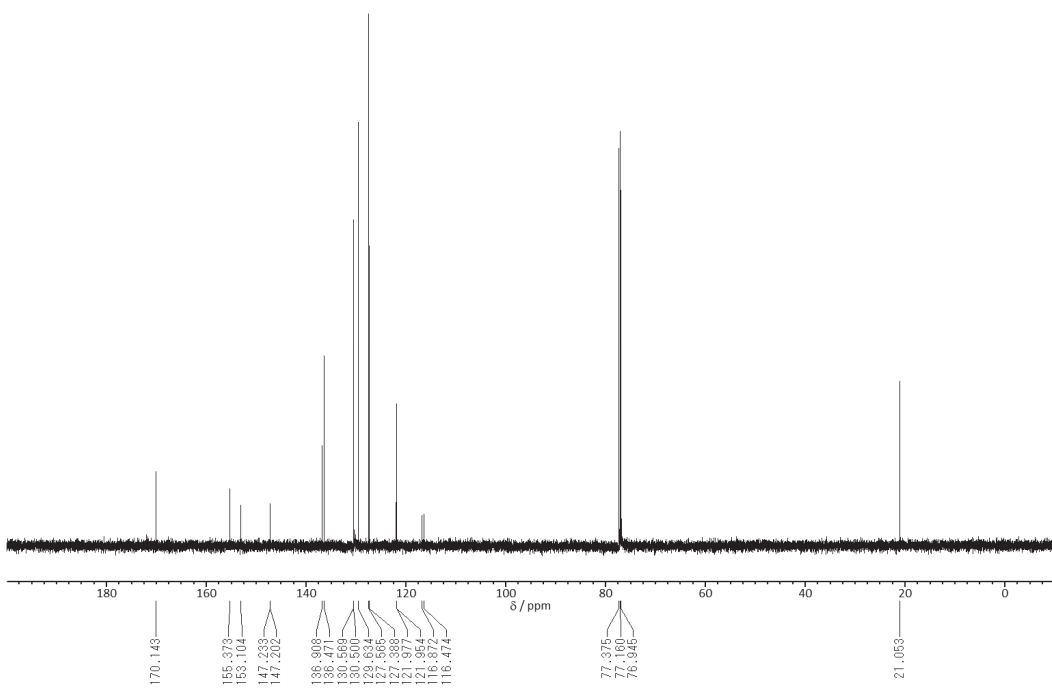

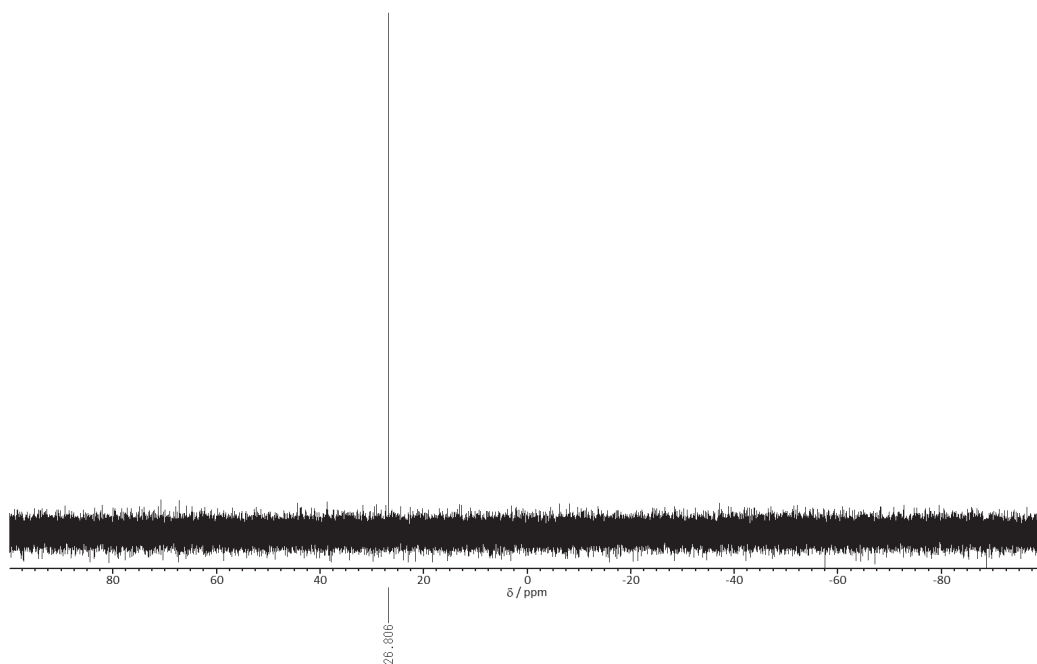

**Figure S22.**  $^1\text{H}$ ,  $^{13}\text{C}\{^1\text{H}\}$  and  $^{19}\text{F}\{^1\text{H}\}$  NMR spectra of **11** (in  $\text{CDCl}_3$ )

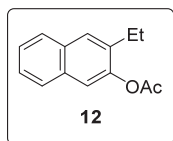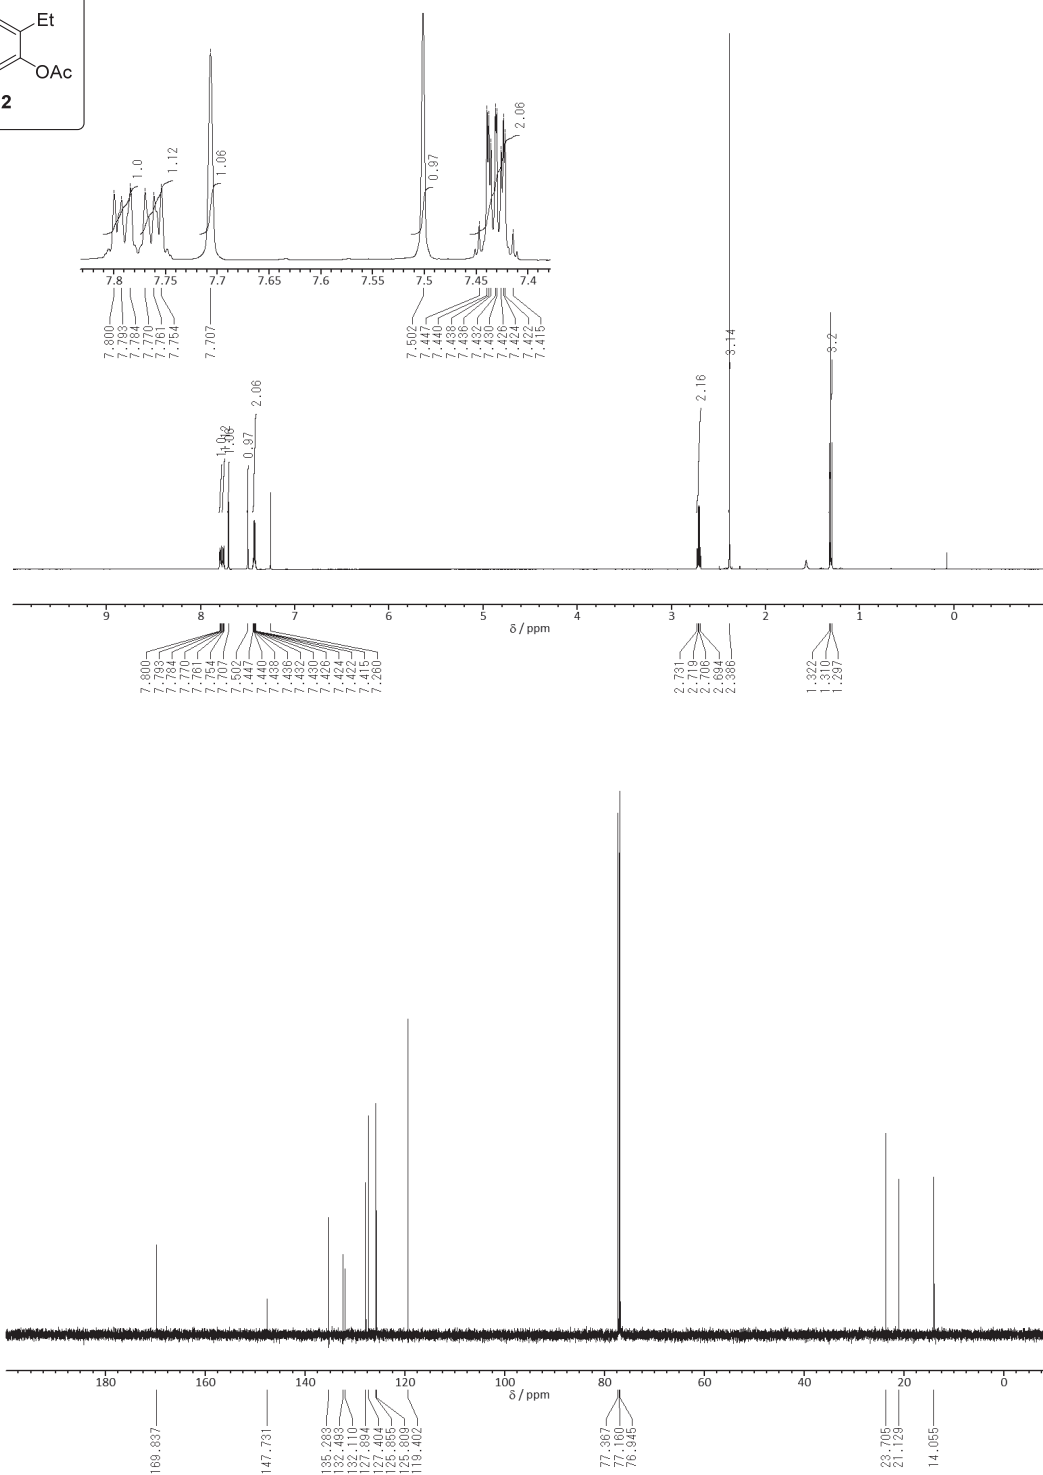

**Figure S23.**  $^1\text{H}$  and  $^{13}\text{C}\{^1\text{H}\}$  NMR spectra of **12** (in  $\text{CDCl}_3$ )



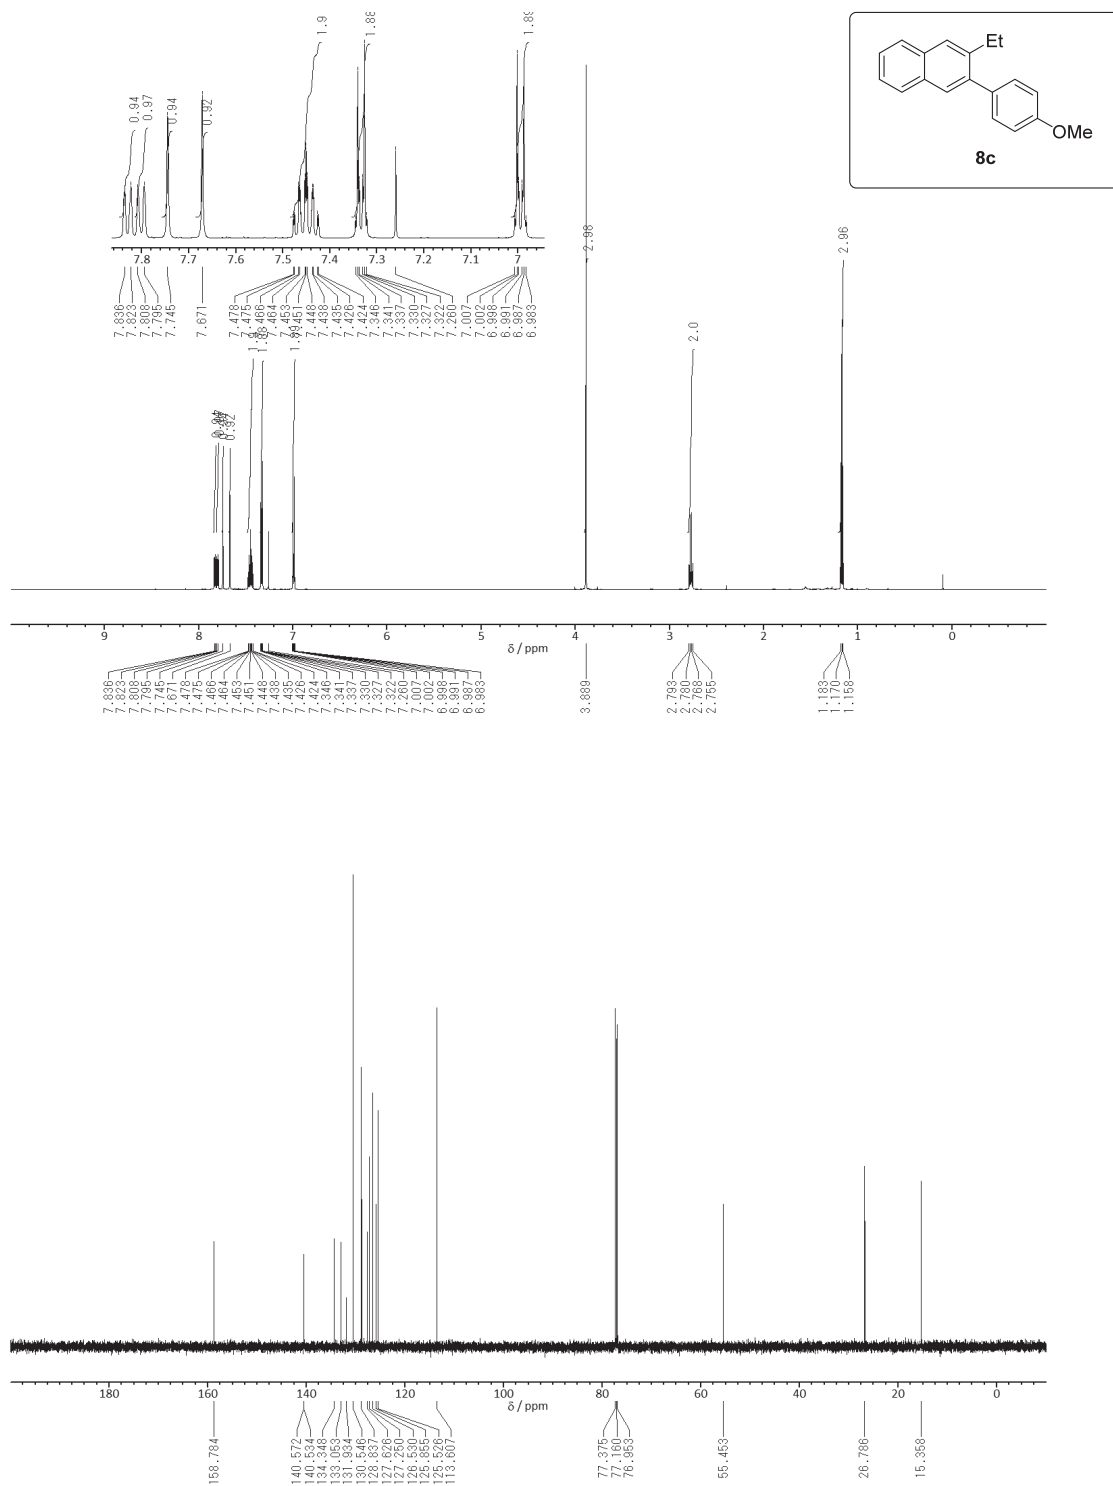

**Figure S25.** <sup>1</sup>H and <sup>13</sup>C{<sup>1</sup>H} NMR spectra of **8c** (in CDCl<sub>3</sub>)



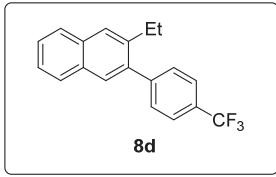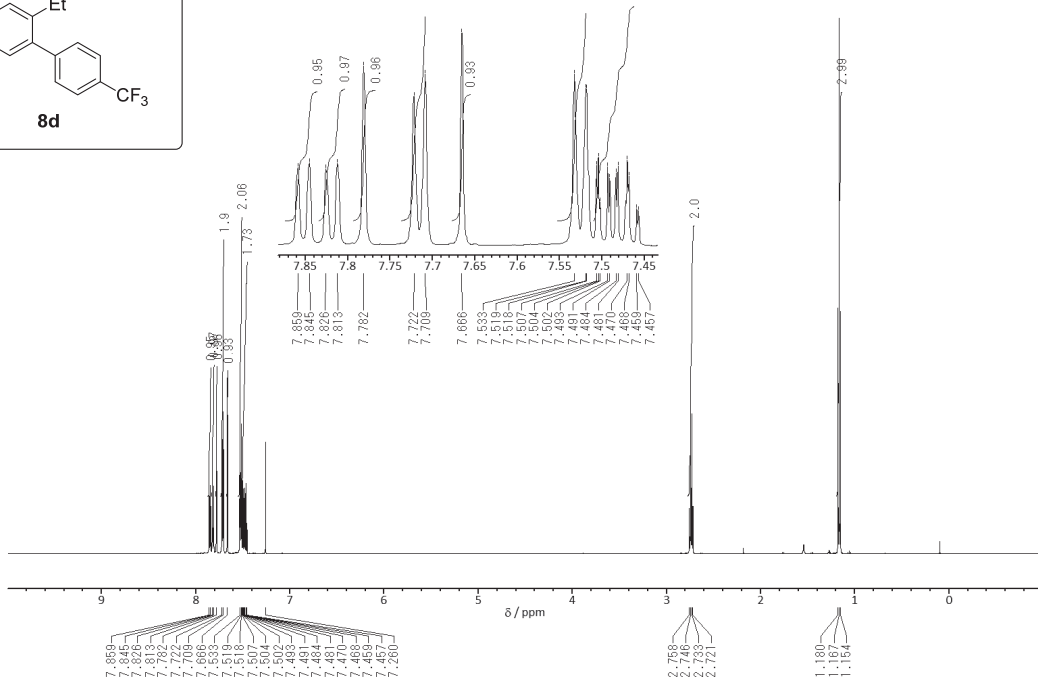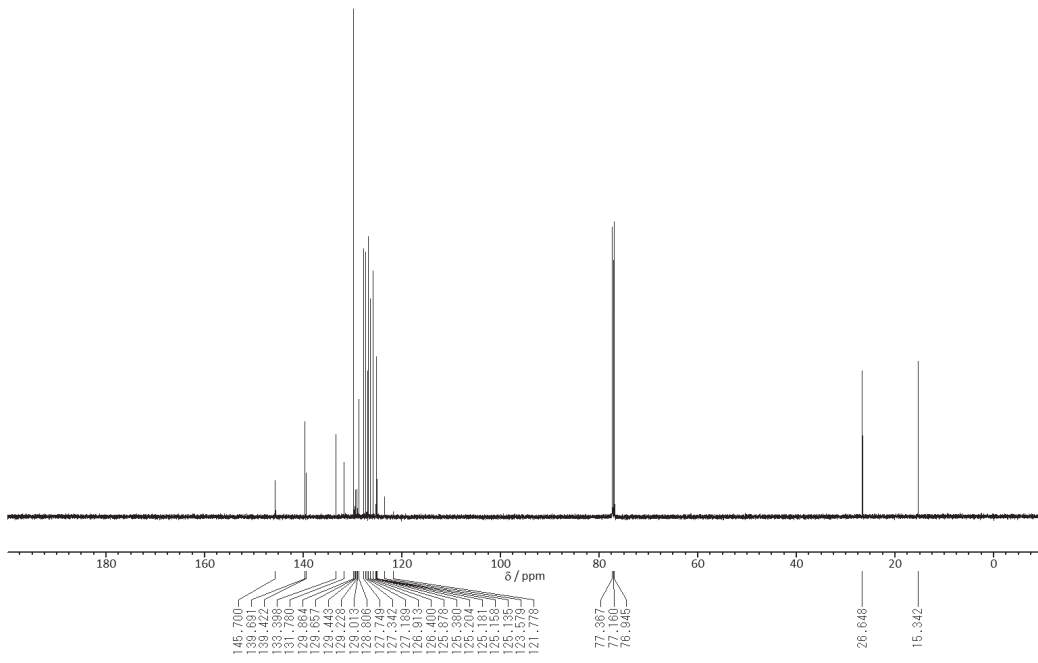

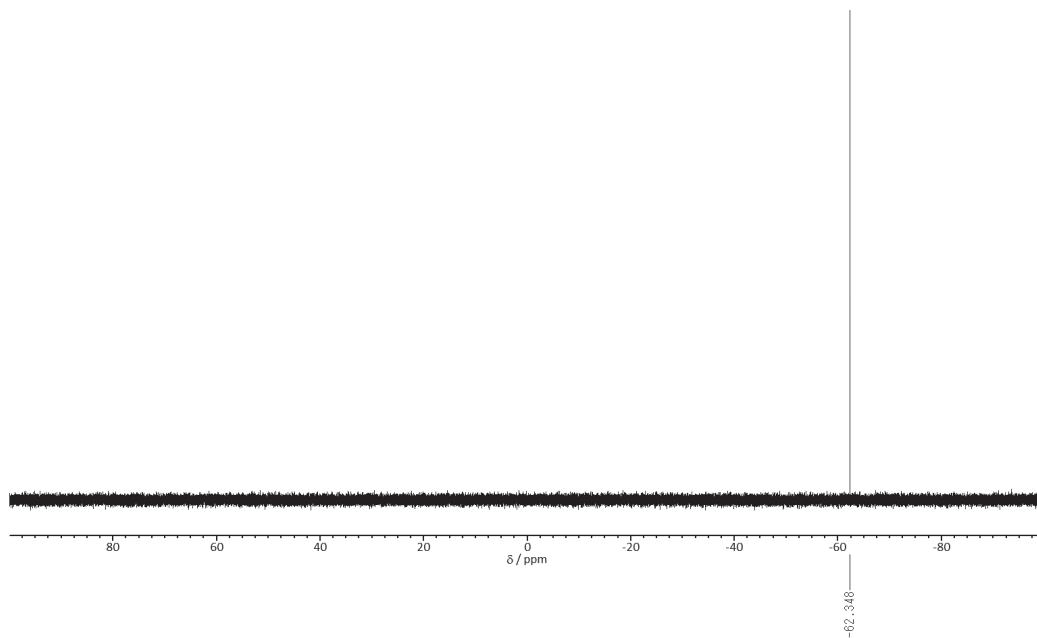

**Figure S26.**  $^1\text{H}$ ,  $^{13}\text{C}\{^1\text{H}\}$  and  $^{19}\text{F}\{^1\text{H}\}$  NMR spectra of **8d** (in  $\text{CDCl}_3$ )

#### 4. Copies of $^1\text{H}$ NMR Charts for the Known Compounds

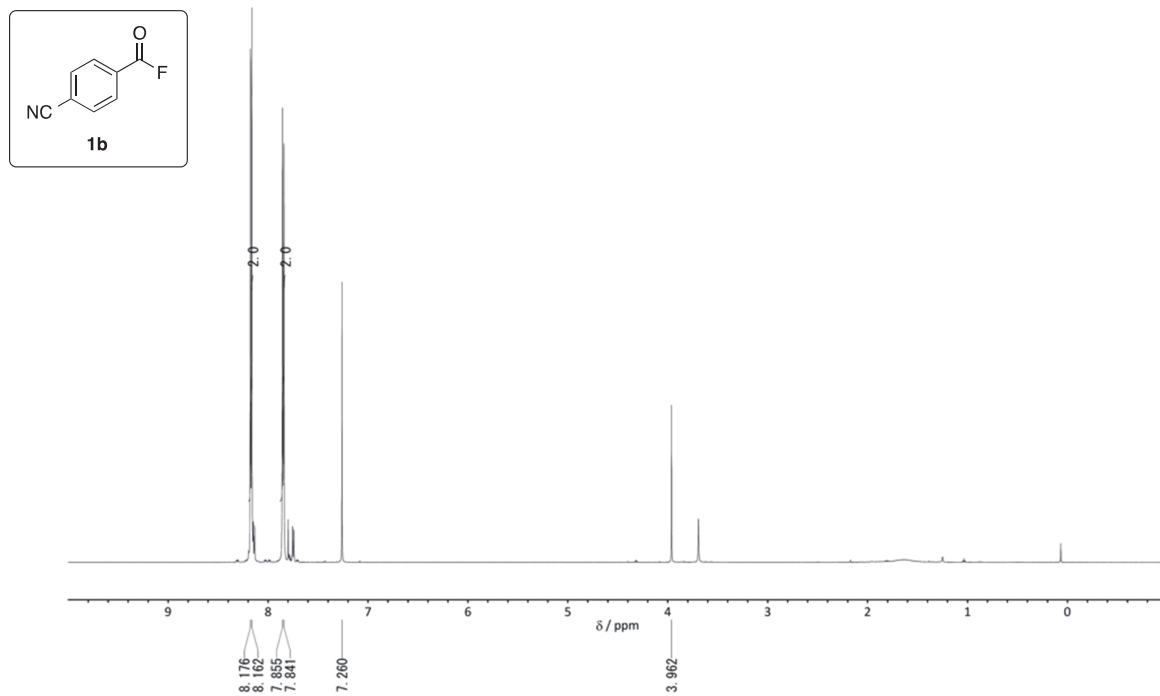

**Figure S27.**  $^1\text{H}$  NMR spectra of **1b** (in  $\text{CDCl}_3$ )

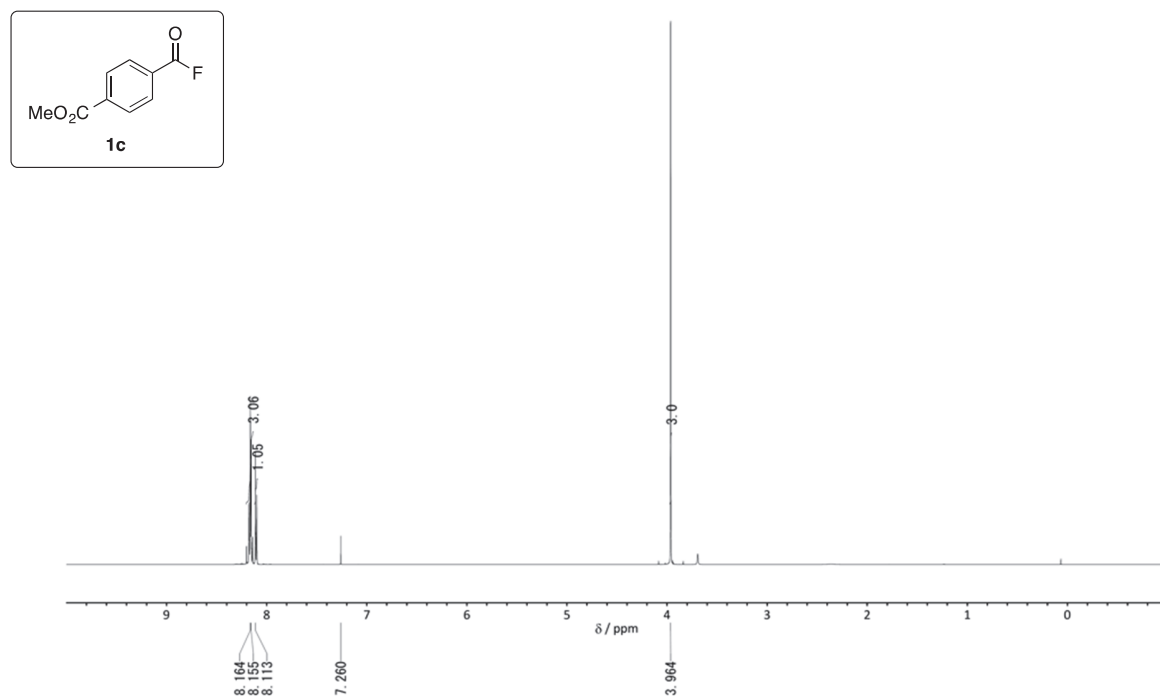

**Figure S28.**  $^1\text{H}$  NMR spectra of **1c** (in  $\text{CDCl}_3$ )

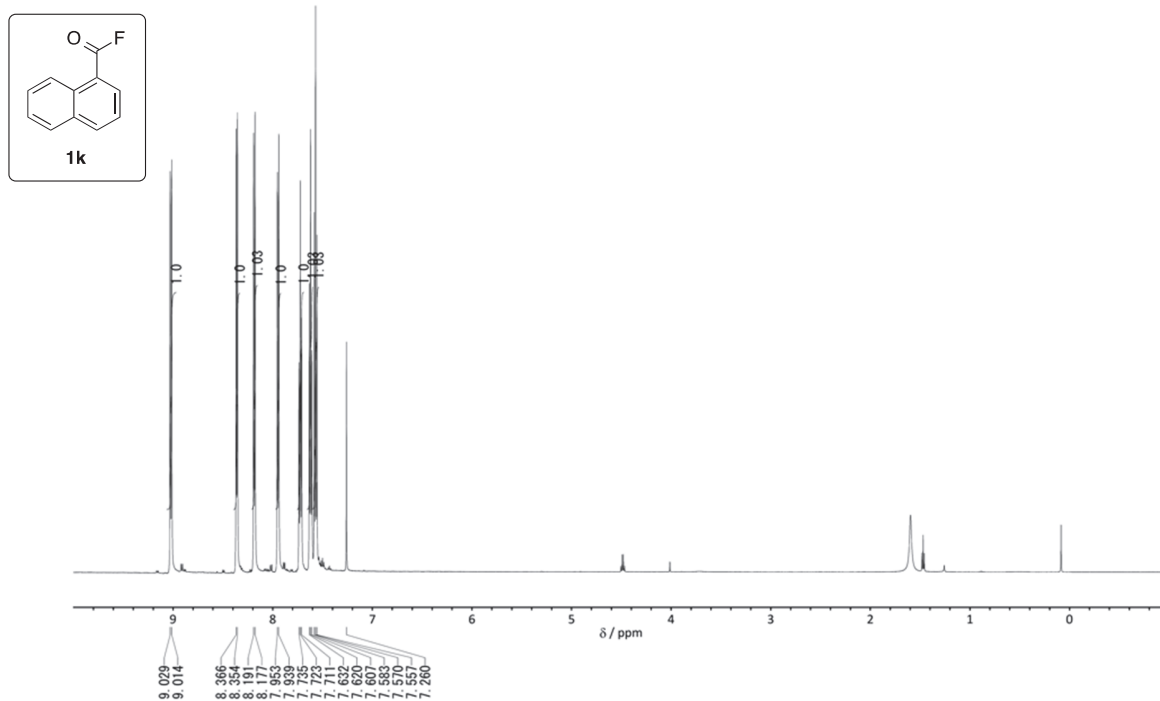

**Figure S29.** <sup>1</sup>H NMR spectra of **1k** (in CDCl<sub>3</sub>)

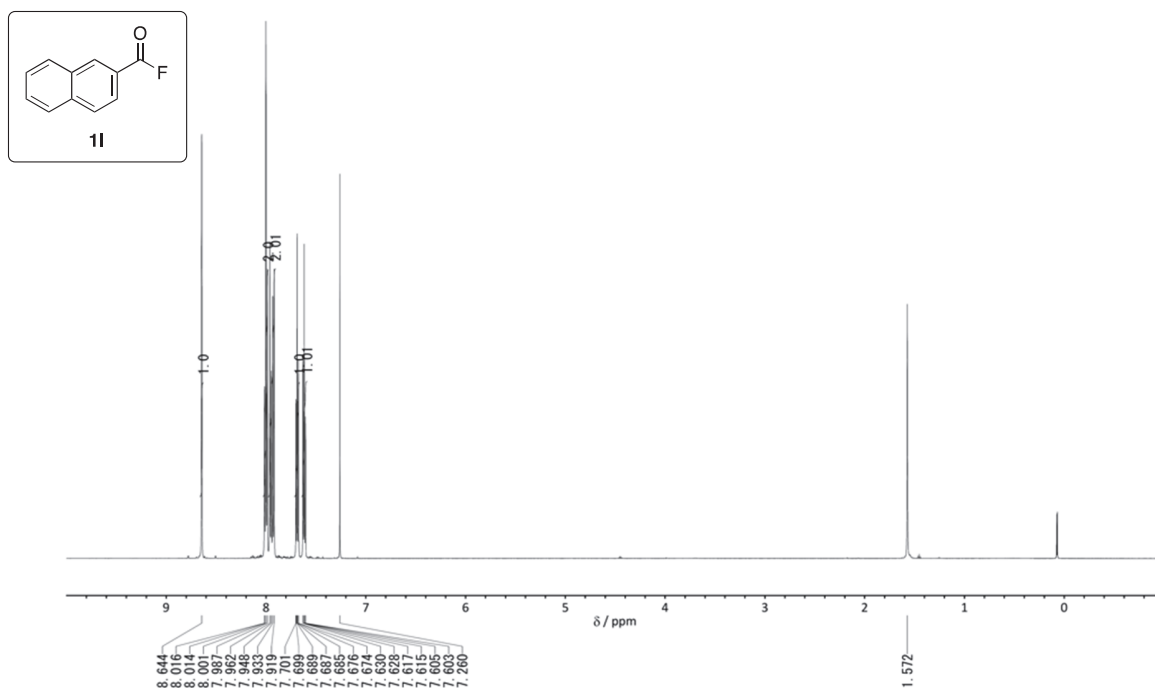

**Figure S30.** <sup>1</sup>H NMR spectra of **1l** (in CDCl<sub>3</sub>)

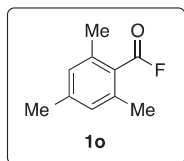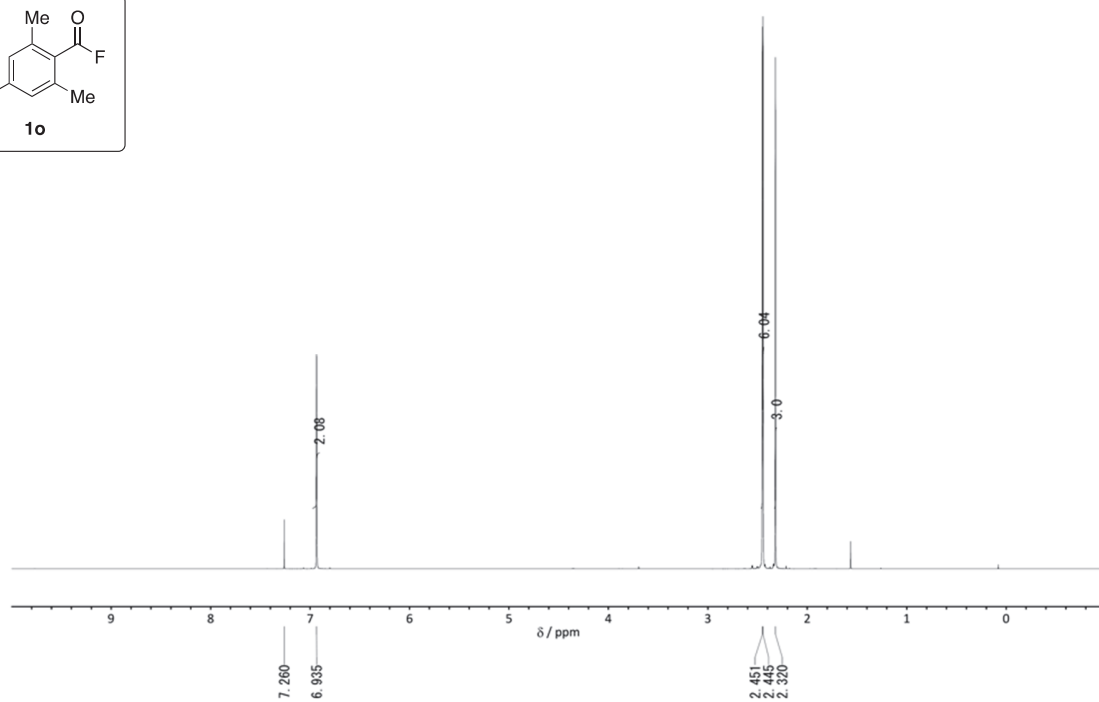

**Figure S31.**  $^1\text{H}$  NMR spectra of **1o** (in  $\text{CDCl}_3$ )

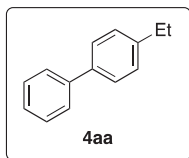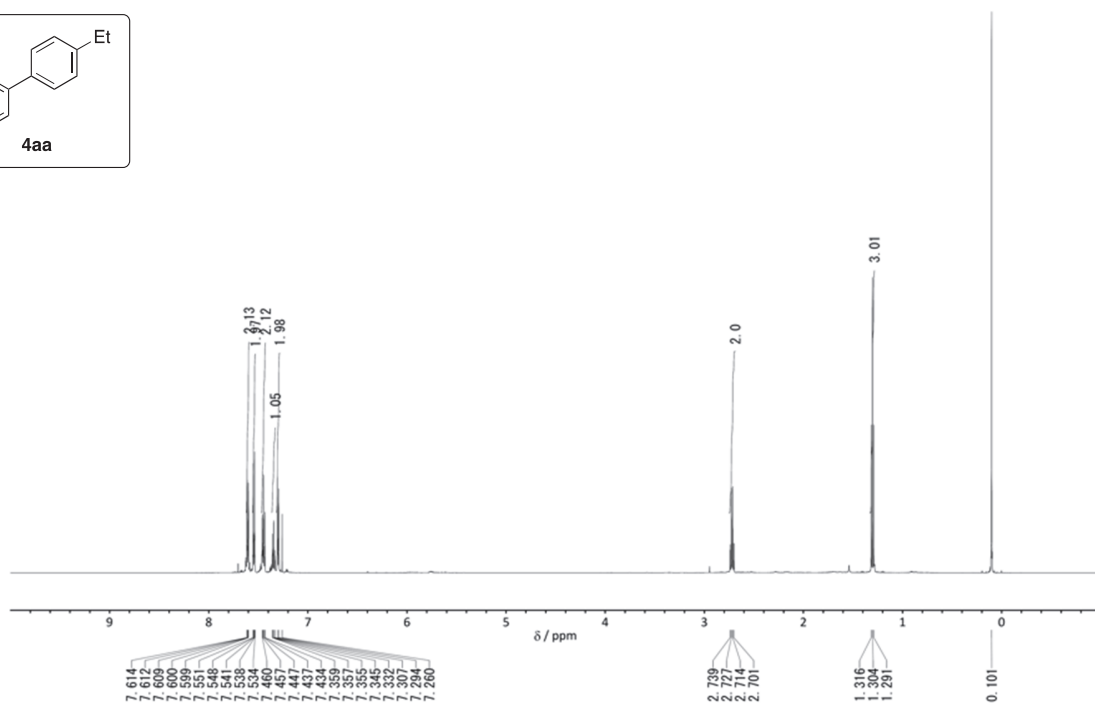

**Figure S32.**  $^1\text{H}$  NMR spectra of **4aa** (in  $\text{CDCl}_3$ )

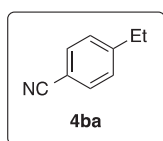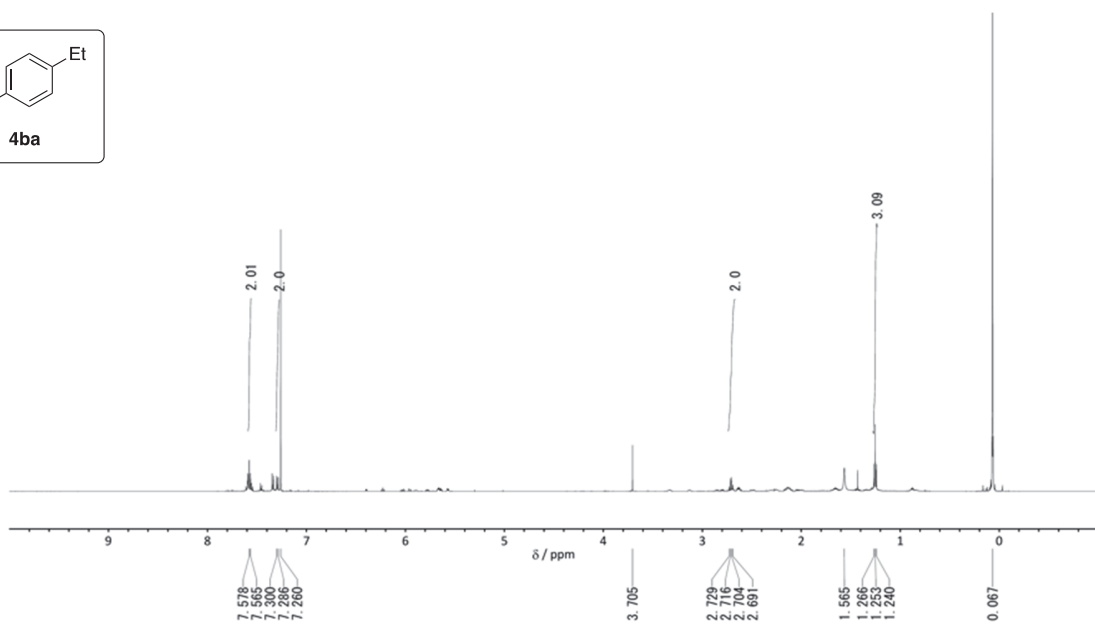

**Figure S33.**  $^1\text{H}$  NMR spectra of **4ba** (in  $\text{CDCl}_3$ )

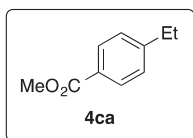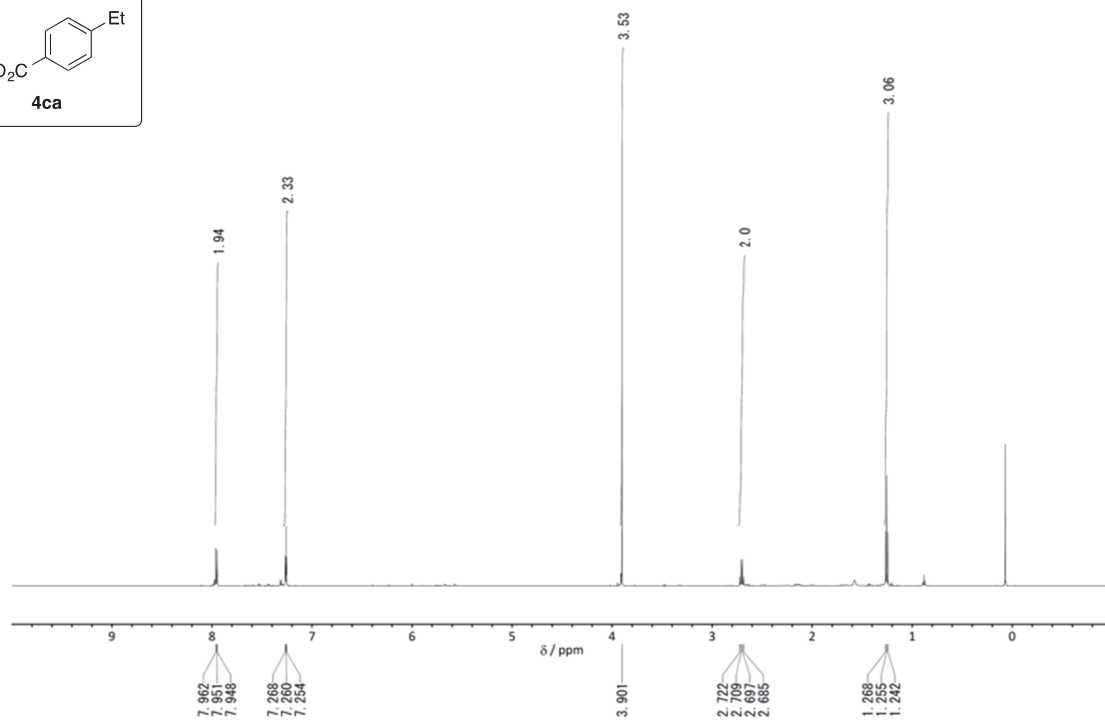

**Figure S34.**  $^1\text{H}$  NMR spectra of **4ca** (in  $\text{CDCl}_3$ )

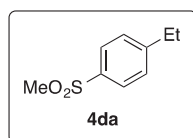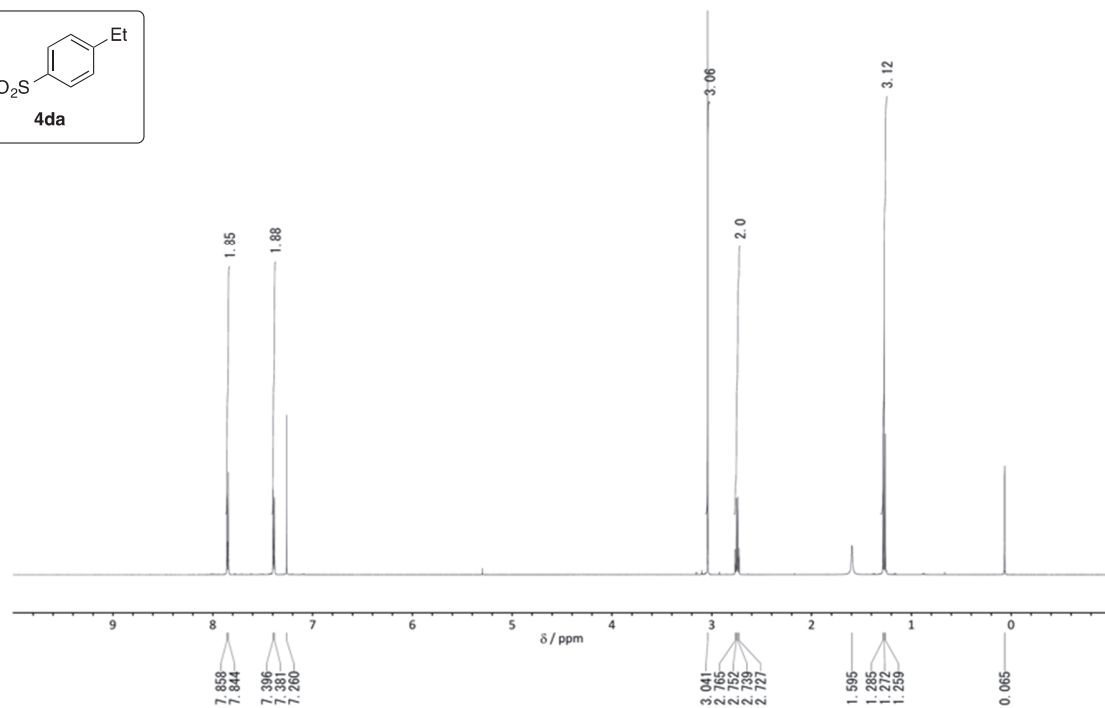

**Figure S35.**  $^1\text{H}$  NMR spectra of **4da** (in  $\text{CDCl}_3$ )

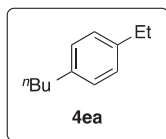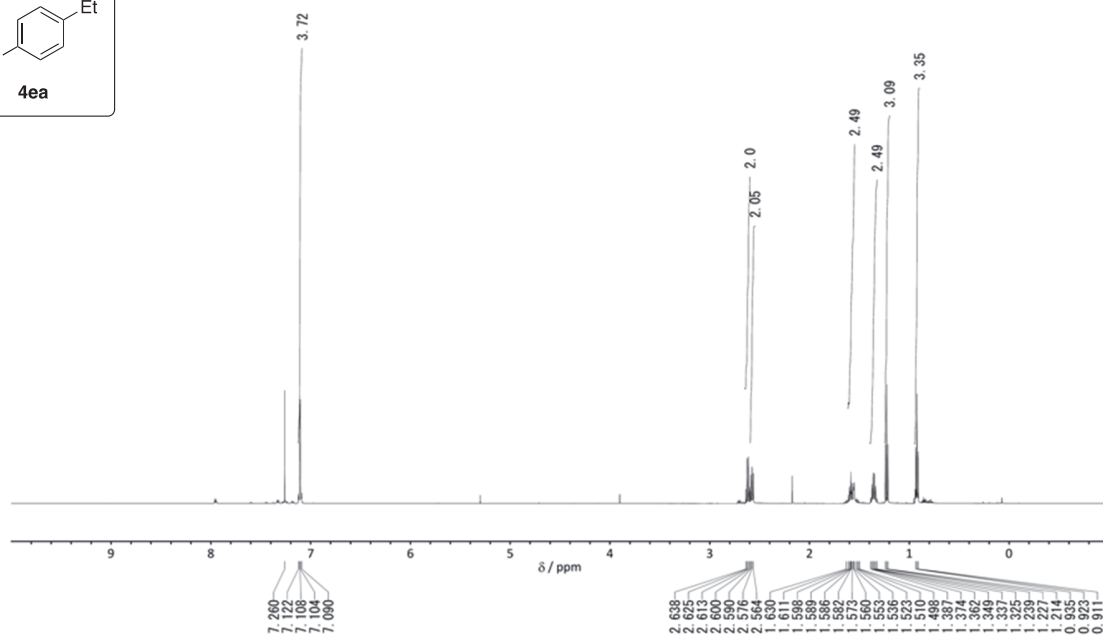

**Figure S36.**  $^1\text{H}$  NMR spectra of **4ea** (in  $\text{CDCl}_3$ )

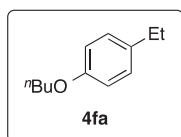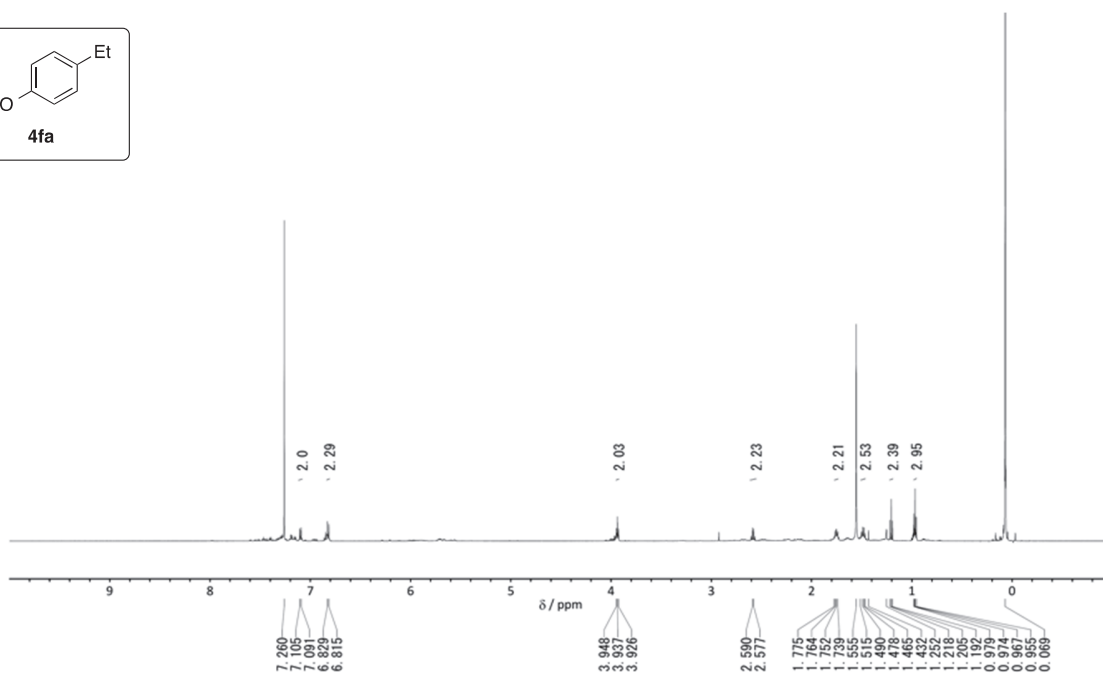

**Figure S37.**  $^1\text{H}$  NMR spectra of **4fa** (in  $\text{CDCl}_3$ )



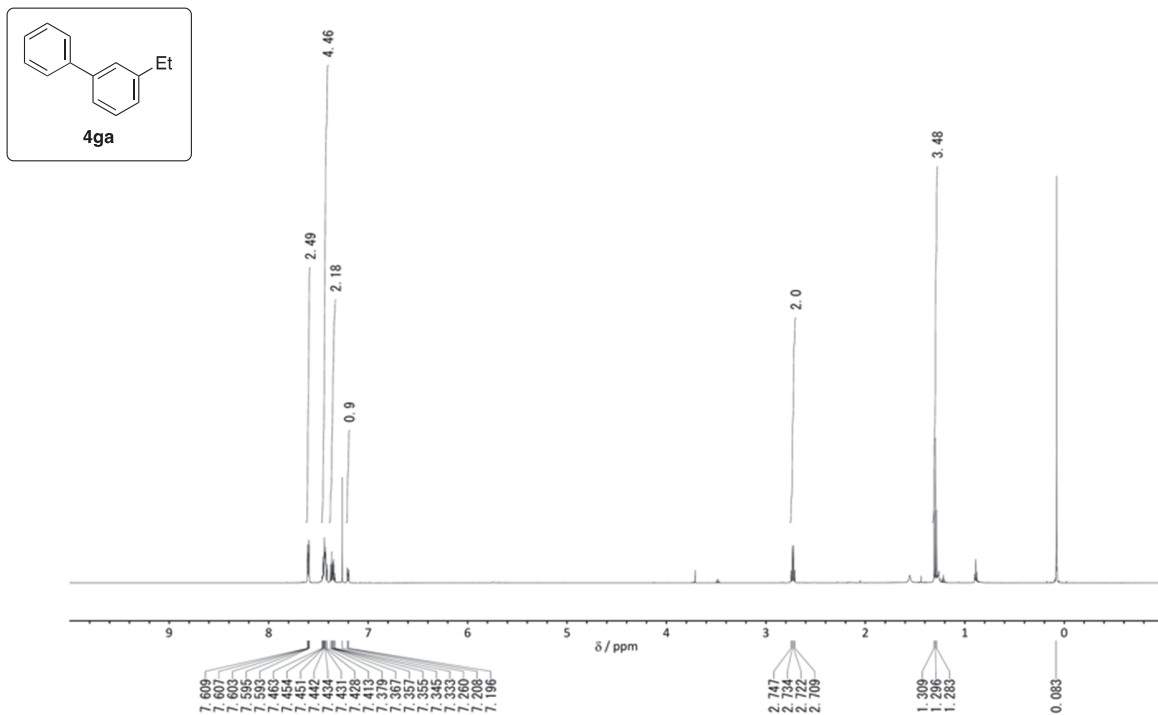

**Figure S38.** <sup>1</sup>H NMR spectra of **4ga** (in CDCl<sub>3</sub>)

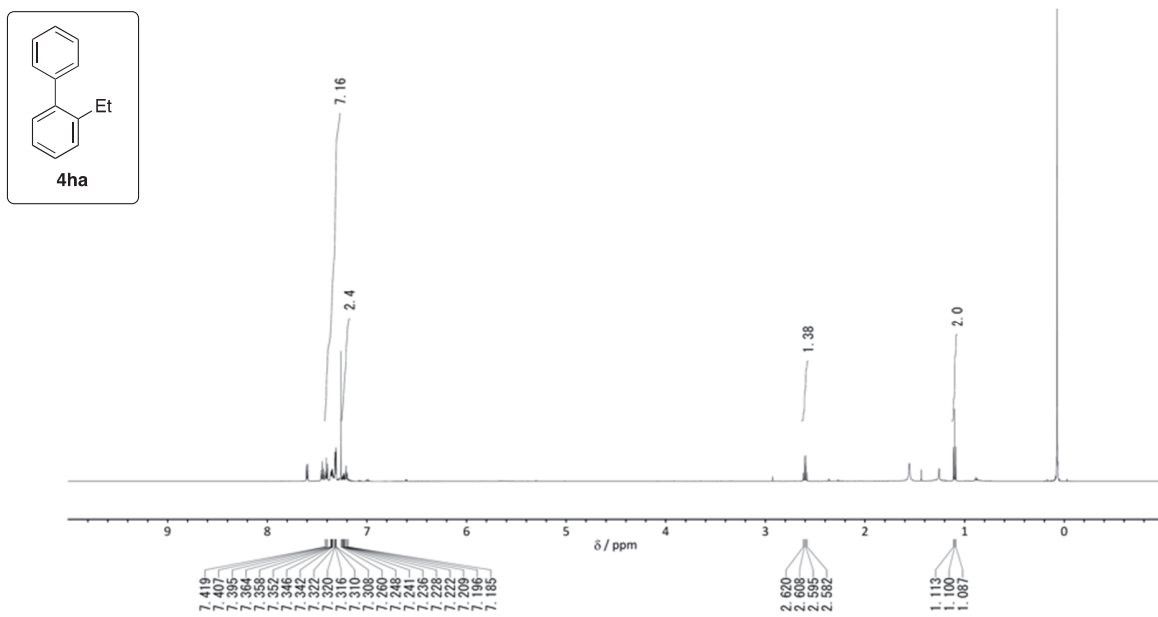

**Figure S39.** <sup>1</sup>H NMR spectra of **4ha** (in CDCl<sub>3</sub>)

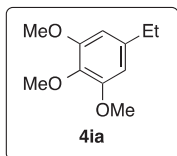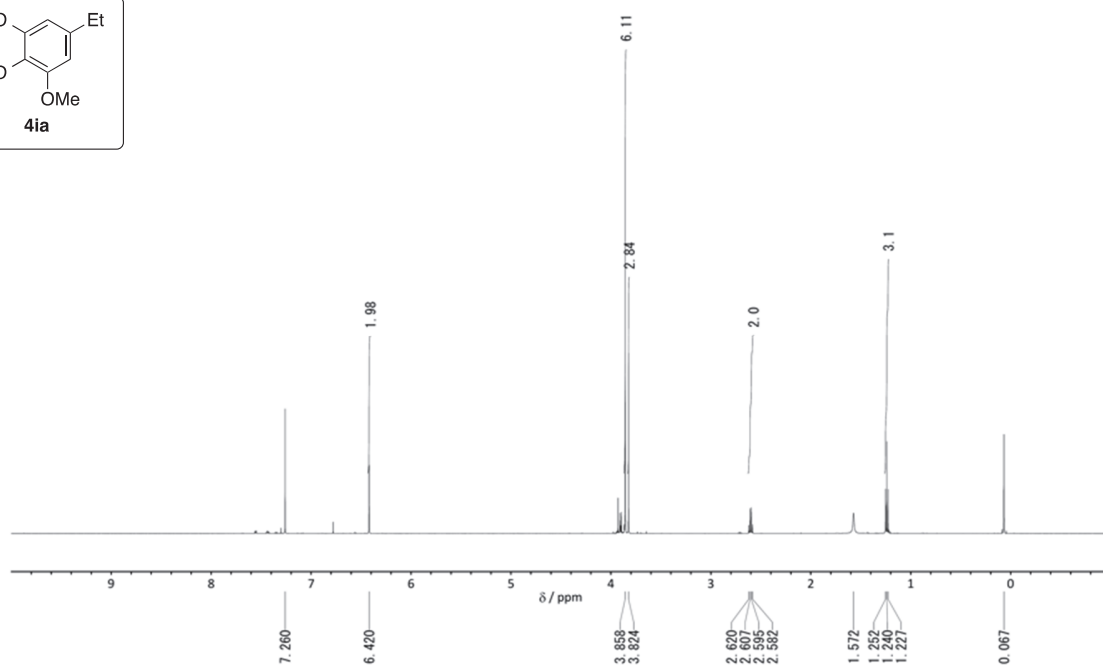

**Figure S40.**  $^1\text{H}$  NMR spectra of **4ia** (in  $\text{CDCl}_3$ )

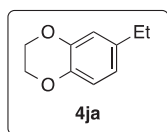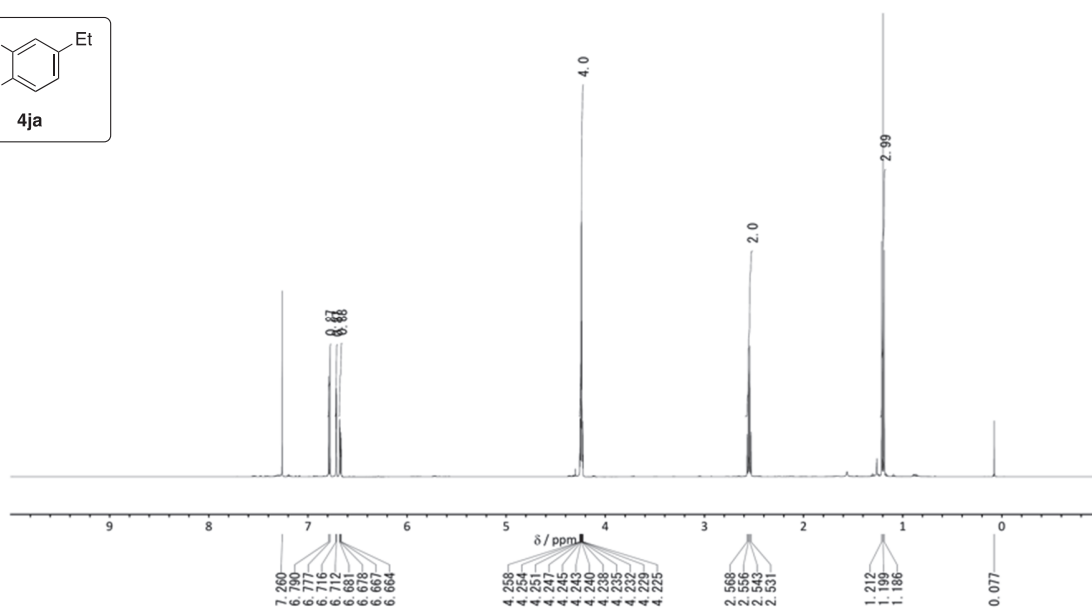

**Figure S41.**  $^1\text{H}$  NMR spectra of **4ja** (in  $\text{CDCl}_3$ )

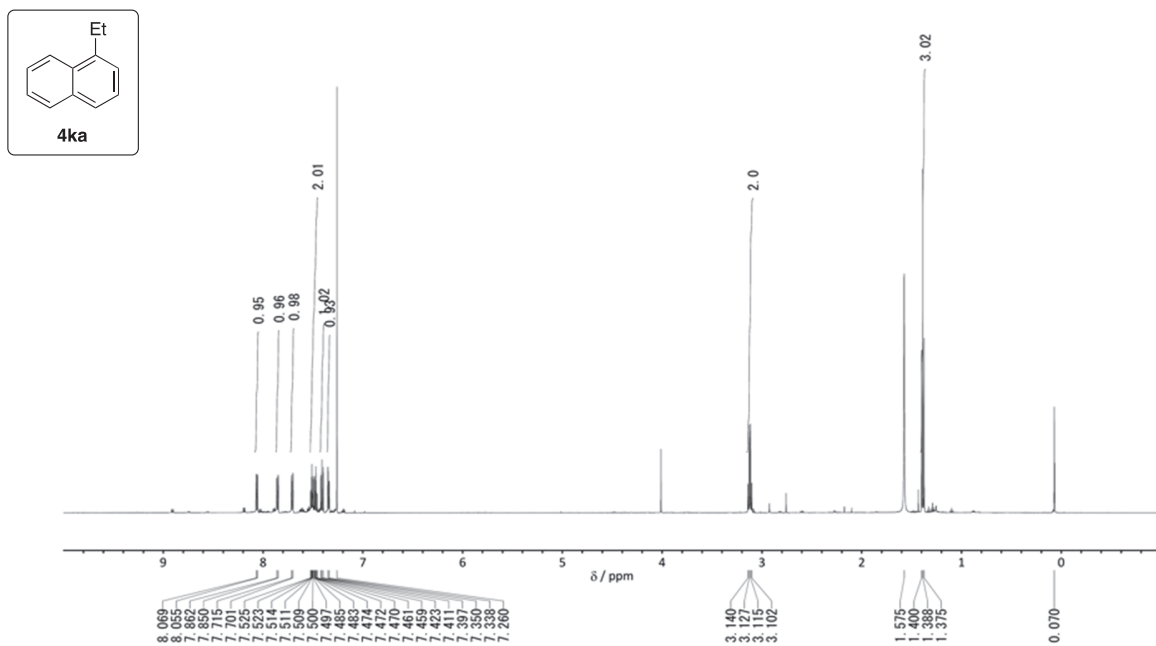

**Figure S42.**  $^1\text{H}$  NMR spectra of **4ka** (in  $\text{CDCl}_3$ )

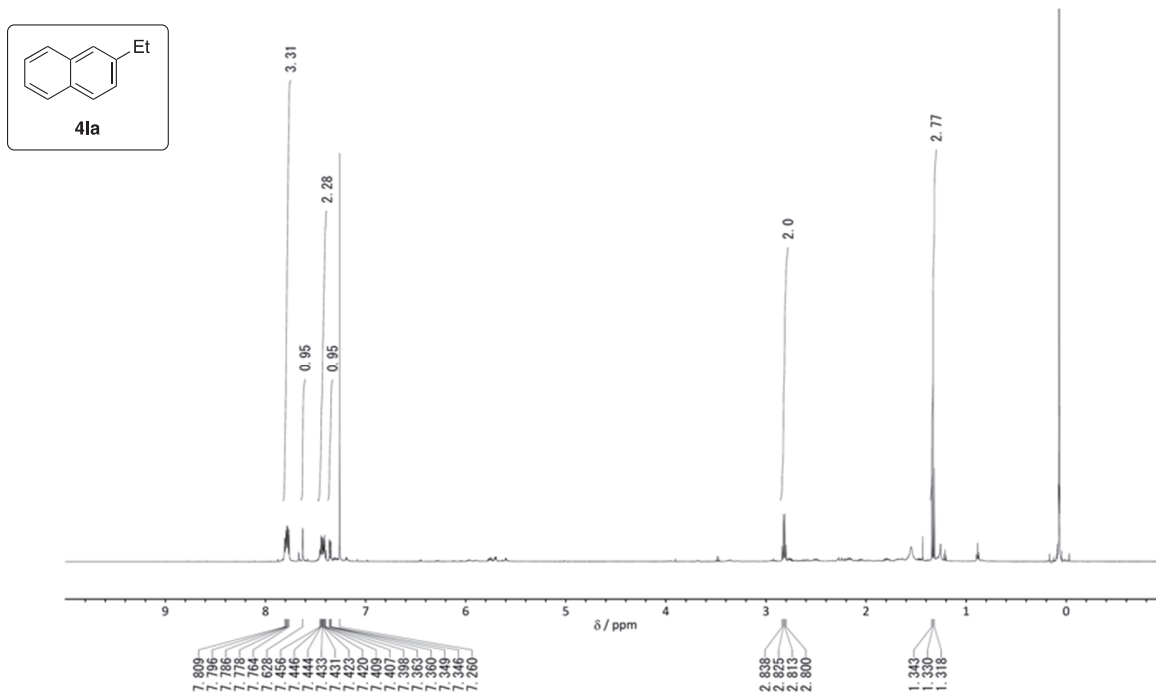

**Figure S43.**  $^1\text{H}$  NMR spectra of **4la** (in  $\text{CDCl}_3$ )

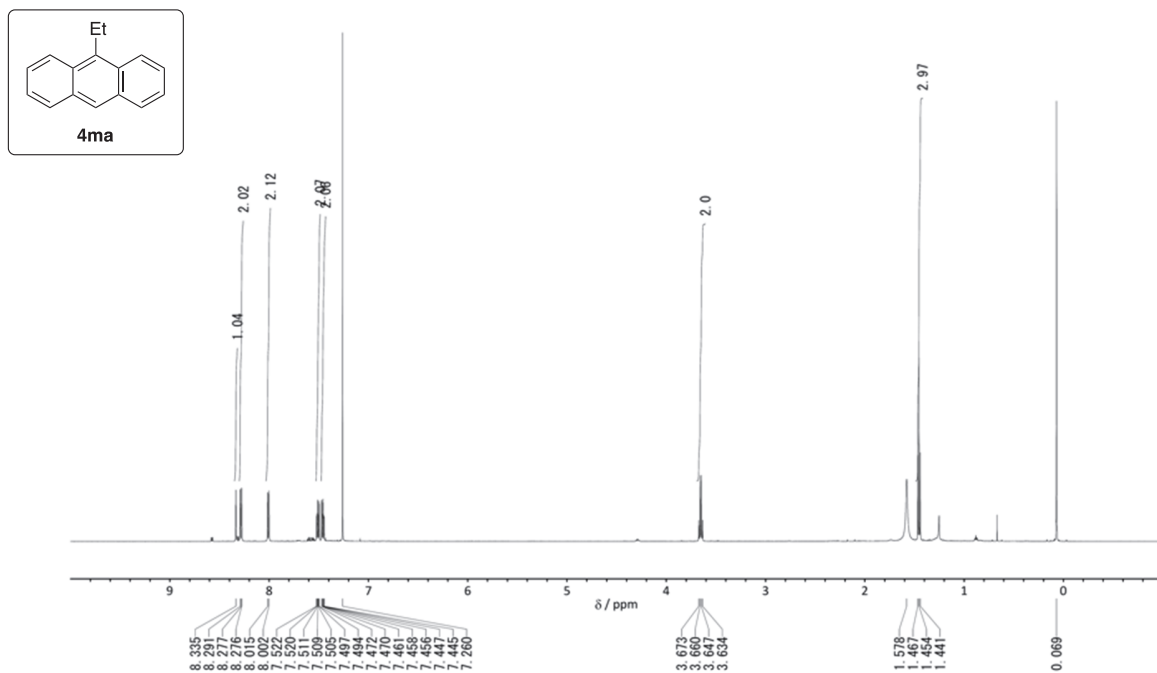

**Figure S44.**  $^1\text{H}$  NMR spectra of **4ma** (in  $\text{CDCl}_3$ )

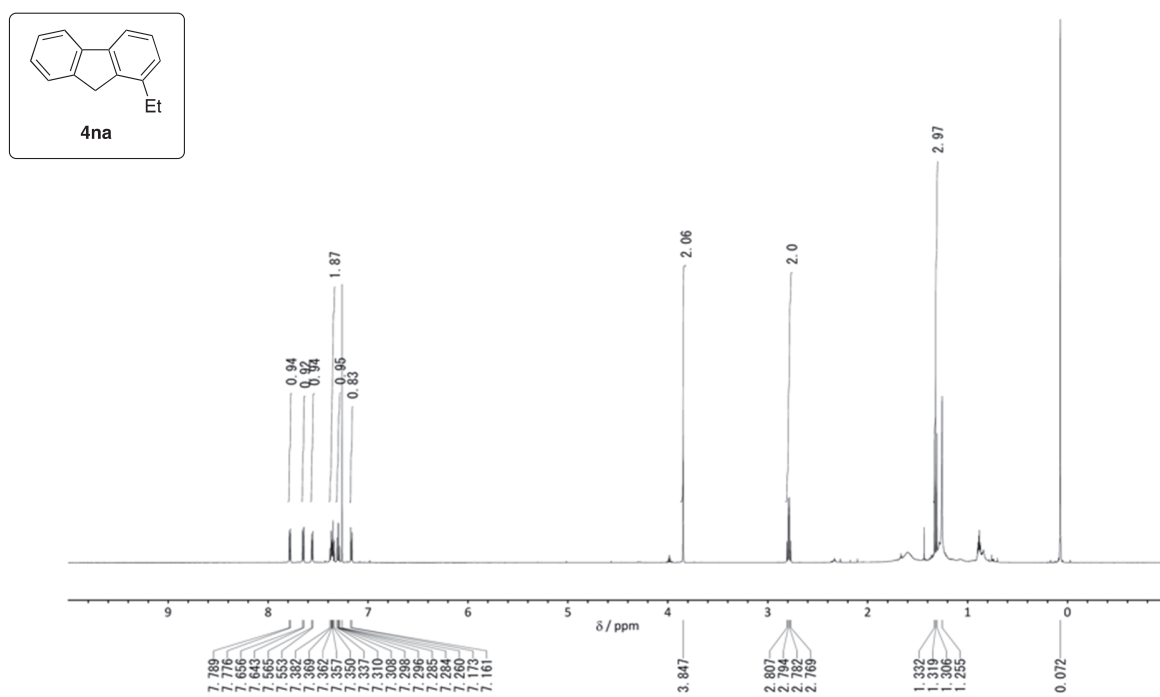

**Figure S45.**  $^1\text{H}$  NMR spectra of **4na** (in  $\text{CDCl}_3$ )

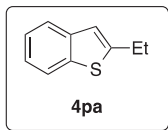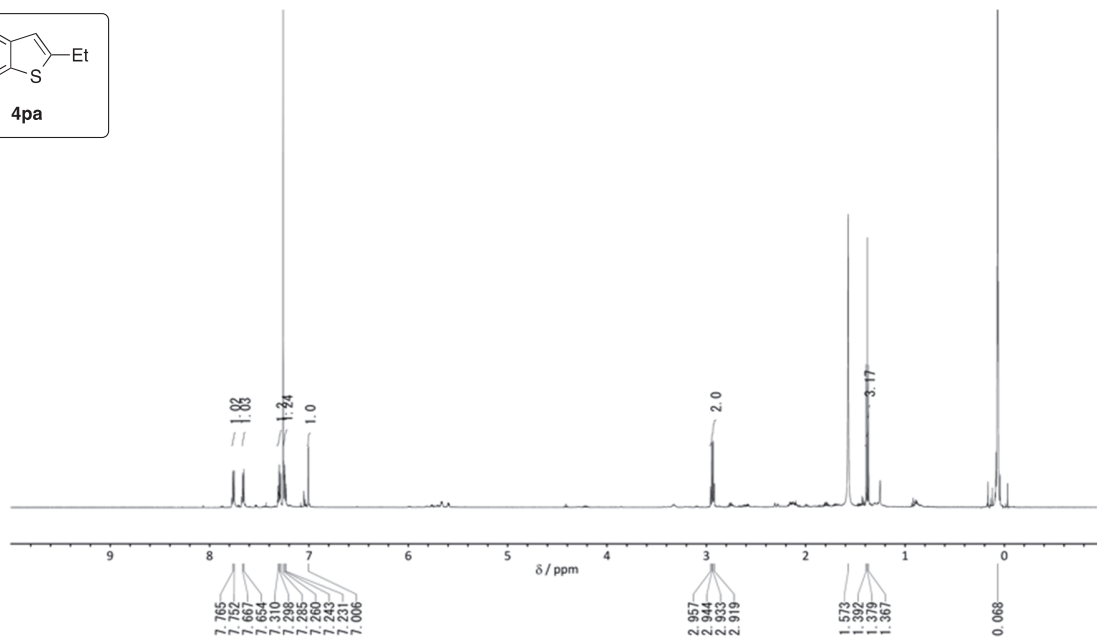

**Figure S46.**  $^1\text{H}$  NMR spectra of **4pa** (in  $\text{CDCl}_3$ )

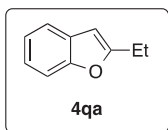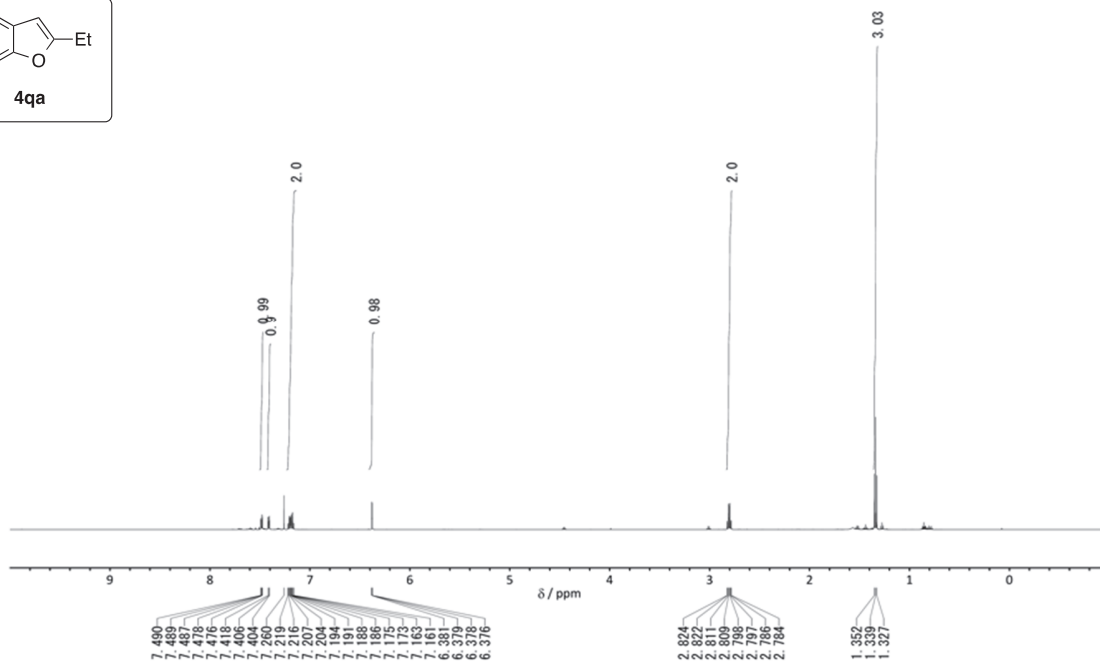

**Figure S47.**  $^1\text{H}$  NMR spectra of **4qa** (in  $\text{CDCl}_3$ )

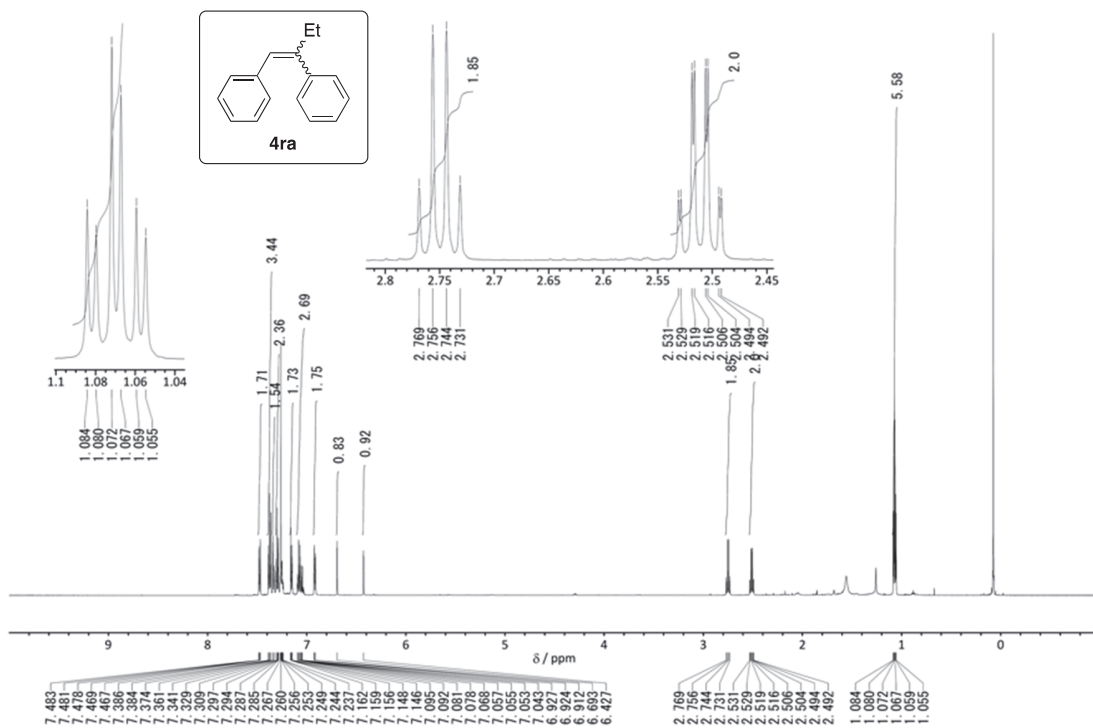

Figure S48. <sup>1</sup>H NMR spectra of **4ra** (in CDCl<sub>3</sub>)

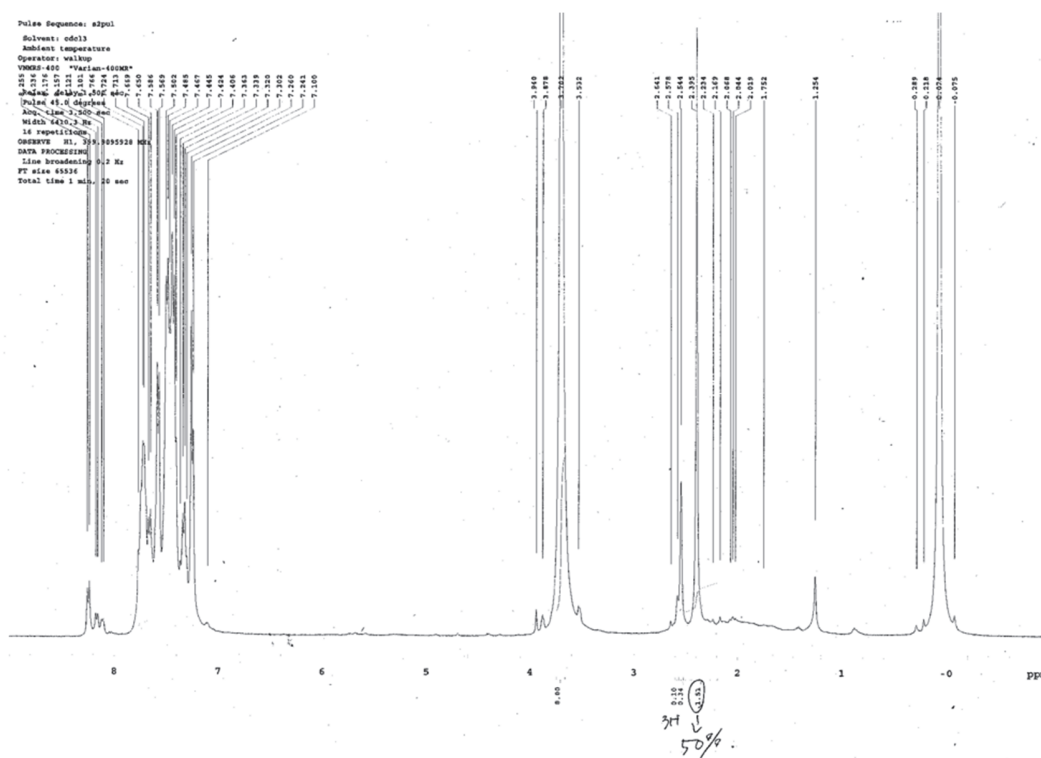

Figure S49. Calculation of NMR yield for the crude mixture of **4ab** (in CDCl<sub>3</sub>)



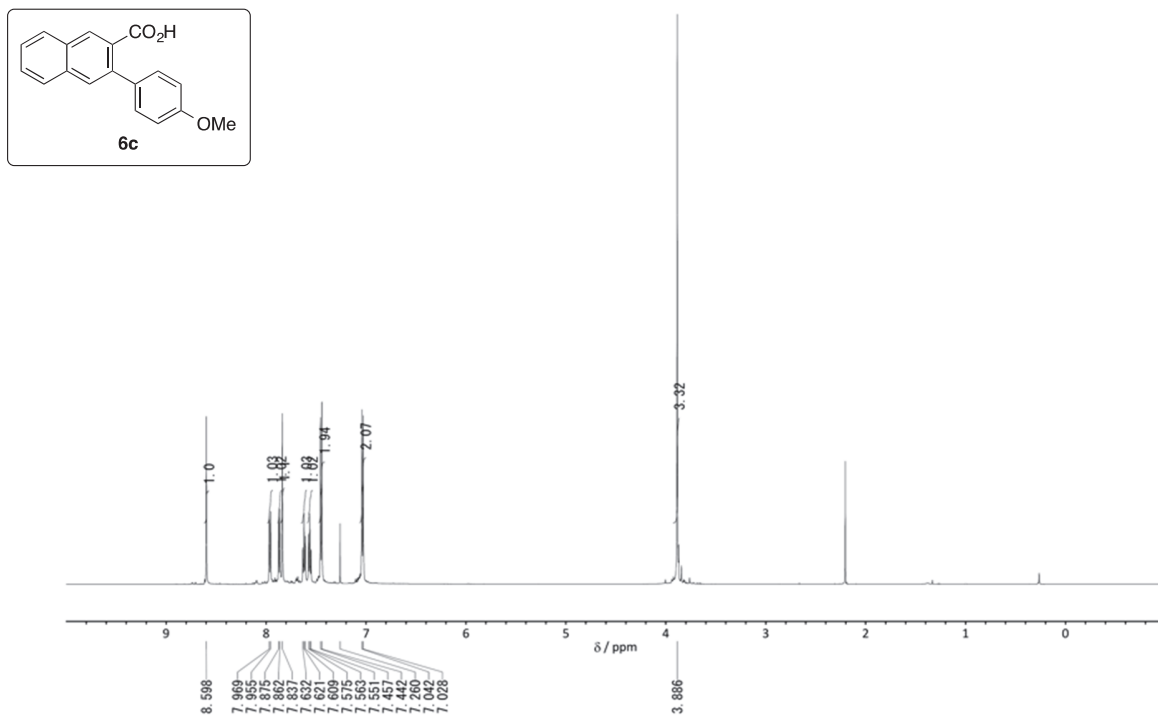

**Figure S52.** <sup>1</sup>H NMR spectra of **6c** (in CDCl<sub>3</sub>)

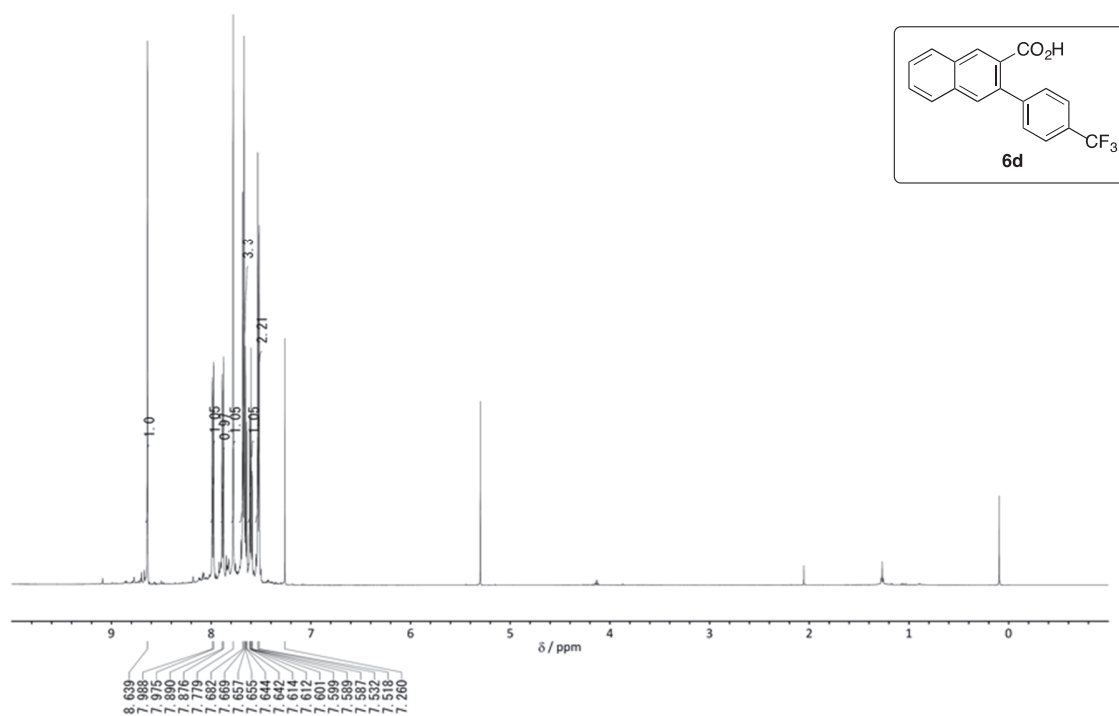

**Figure S53.** <sup>1</sup>H NMR spectra of **6d** (in CDCl<sub>3</sub>)



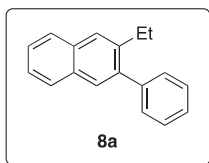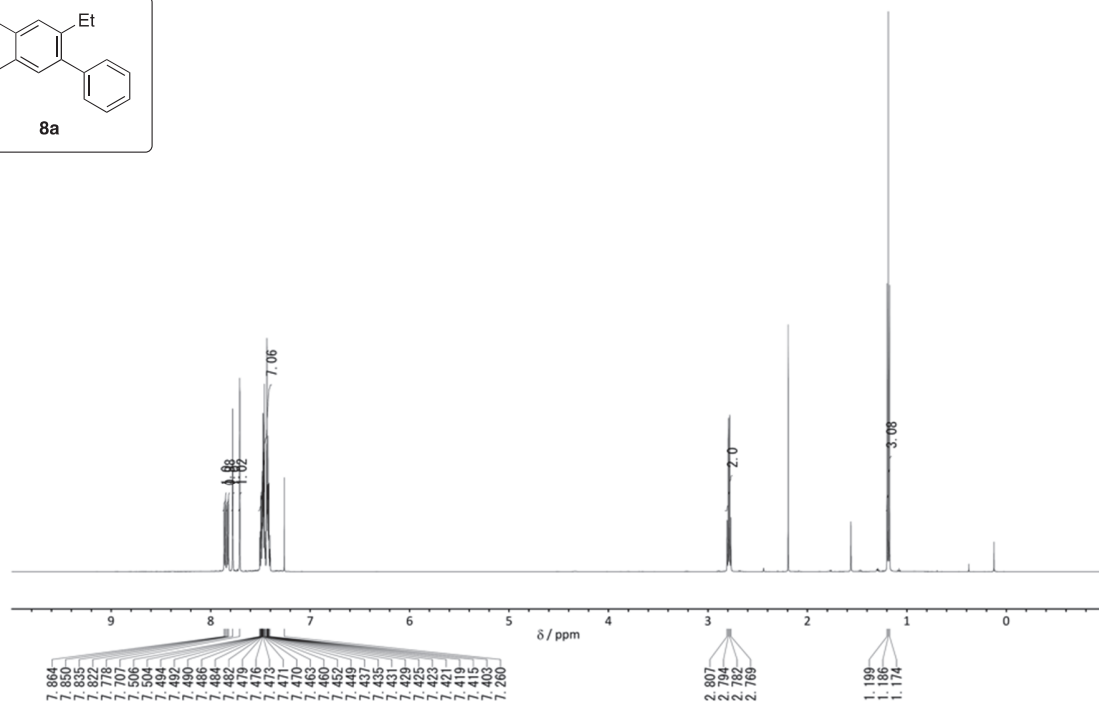

**Figure S54.**  $^1\text{H}$  NMR spectra of **8a** (in  $\text{CDCl}_3$ )

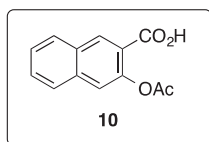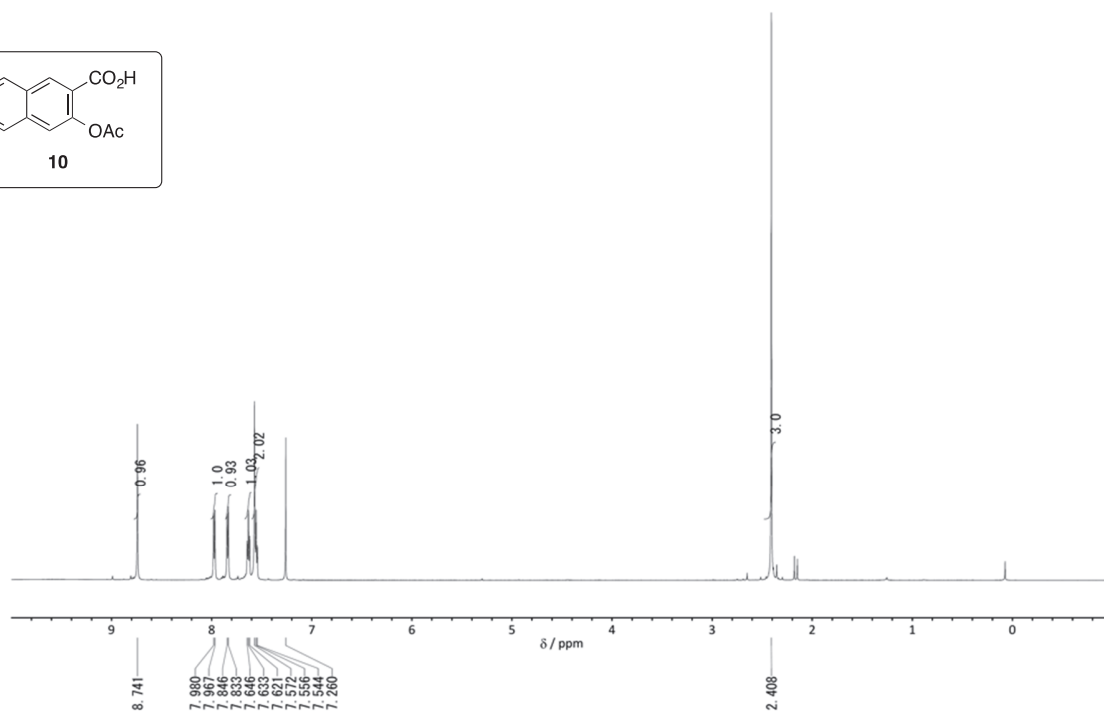

**Figure S55.**  $^1\text{H}$  NMR spectra of **10** (in  $\text{CDCl}_3$ )

- 
- 1) Guan, B.-T.; Xiang, S.-K.; Wang, B.-Q.; Sun, Z.-P.; Wang, Y.; Zhao, K.-Q.; Shi, Z.-J. *J. Am. Chem. Soc.* **2008**, *130*, 3268–3269.
  - 2) Kondolff, I.; Doucet, H.; Santelli, M. *Organometallics* **2006**, *25*, 5219–5222.
  - 3) Yuan, G.; Zheng, J.; Gao, X.; Li, X.; Huang, L.; Chen, H.; Jiang H. *Chem. Commun.* **2012**, *48*, 7513–7515.
  - 4) Alonso, N.; Miller, L. Z.; Muñoz, J. de M.; Alcazar, J.; McQuade, D. T. *Adv. Synth. Catal.* **2014**, *356*, 3737–3741.
  - 5) NMR data of this product has not been reported,; CAS Registry Number [1338999-54-4]
  - 6) Olsen, E. P. K.; Madsen, R. *Chem. Eur. J.* **2012**, *18*, 16023–16029.
  - 7) Kalutharage N.; Yi, C. S. *J. Am. Chem. Soc.* **2015**, *137*, 11105–11114.
  - 8) Chauhan, B. P. S.; Rathore, J. S.; Bando, T. *J. Am. Chem. Soc.* **2004**, *126*, 8493–8500.
  - 9) NMR data of this product has not been reported, but synthesis was reported; Cairns, J. F.; Hickinbottom, W. J. *J. Chem. Soc.* **1962**, 867–870.
  - 10) Bryan, C. S.; Braunger, J. A.; Lautens, M. *Angew. Chem. Int. Ed.* **2009**, *48*, 7064–7068.
  - 11) McKinley, N. F.; O'Shea, D. F. *J. Org. Chem.* **2006**, *71*, 9552–9555.
  - 12) Tanaka, R.; Sanjiki, H.; Urabe, H. *J. Am. Chem. Soc.* **2008**, *130*, 2904–2905.
  - 13) Bandari, R.; Höche, T.; Prager, A.; Dirnberger, K.; Buchmeiser, M. R. *Chem. Eur. J.* **2010**, *16*, 4650–4658.
  - 14) Chiong, H. A.; Pham, Q.-N.; Daugulis, O. *J. Am. Chem. Soc.* **2007**, *129*, 9879–9884.
  - 15) Xu, Z.; Yang, T.; Lin, X.; Elliott, J. D.; Ren, F. *Tetrahedron Lett.* **2015**, *56*, 475–477.
